# Supplementary material for: Genes Identified by Visible Mutant Phenotypes Show Increased Bias toward One of Two Subgenomes of Maize
Source: PLoS One. 2011 Mar 10;6(3):e17855. doi: 10.1371/journal.pone.0017855 (PMC3053395; doi:10.1371/journal.pone.0017855)
Supplement: Supplemental Information S1 — (XLS) [file pone.0017855.s003.xls]

## Sheet: Sheet1
An up to date version of this list is maintained on Cogepedia (http://synteny.cnr.berkeley.edu/wiki/index.php/Classical_Maize_Genes). If you discover any errors or omissions in this list contact James Schnable (jschnable@berkeley.edu)
Symbol	Citation	Gene Name	Identified by Phenotype	MaizeGDB Link	GenBank ID	Chromosome	Strand	B73 refgen2 Gene	Subgenome	Comments	Proofing Link	Local duplicates	Homeolog	Sorghum Ortholog	Setaria Ortholog	Rice Ortholog	Brachy Ortholog	Pan-grass panel Link	Gene Model IDed by MaizeSequence.org	UC-Berkeley vs. Maizesequence.org	Link to compare genes where our assignments differed	Analysis of disagreements between maizesequence.org and UC-Berkeley
wx1	176	waxy1	Y	http://www.maizegdb.org/cgi-bin/displaylocusrecord.cgi?id=12768	X03935	chr9	-1	GRMZM2G024993	1	Good	http://genomevolution.org/r/25fq		too big a gap	Sb10g002140	PAC:18197948	Os06g04200	Bradi1g50090	http://genomevolution.org/r/25fr	GRMZM2G024993	Identical Assignment
adh1	173	alcohol dehydrogenase1		http://www.maizegdb.org/cgi-bin/displaylocusrecord.cgi?id=12021	X00580	chr1	-1	GRMZM2G442658	1	Good	http://genomevolution.org/r/25yz		chr5:7934557-8053554	Sb01g008730	chr1:5664436-6129105	chr3:30154185-30678637	chr1:6207197-6768216	http://genomevolution.org/r/26iy	GRMZM2G442658	Identical Assignment
o2	152	opaque endosperm2	Y	http://www.maizegdb.org/cgi-bin/displaylocusrecord.cgi?id=12495	X15544	chr7	1	GRMZM2G015534	1	Good	http://genomevolution.org/r/25ek		chr2:233375937-233479855	Sb02g004590	PAC:18183040	Os07g08420	Bradi1g55450	http://genomevolution.org/r/26fa	GRMZM2G015534	Identical Assignment
p1	127	pericarp color1	Y	http://www.maizegdb.org/cgi-bin/displaylocusrecord.cgi?id=12517	U57002	chr1	-1	GRMZM2G084799	1	3' UTR missing	http://genomevolution.org/r/25l8		GRMZM2G022686	Sb01g037670	PAC:18191887	Os03g19120	Bradi1g64690	http://genomevolution.org/r/25l9	No Gene Identified by Maizesequence.org	NA
bz1	122	bronze1	Y	http://www.maizegdb.org/cgi-bin/displaylocusrecord.cgi?id=12098	X07937	chr9	-1	GRMZM2G165390	1	Good	http://genomevolution.org/r/25u7		chr6:107102688-107370412	Sb10g006140	PAC:18199108	Os06g09240	Bradi1g46850	http://genomevolution.org/r/25u8	GRMZM2G165390	Identical Assignment
sh1	122	shrunken1	Y	http://www.maizegdb.org/cgi-bin/displaylocusrecord.cgi?id=12634	X02400	chr9	1	GRMZM2G089713	1	Extra 5' UTR in maizesequence.org	http://genomevolution.org/r/25m8	GRMZM2G090962||GRMZM2G090974	chr6:107334200-107521484	Sb10g006330	PAC:18198292	Os06g09450	Bradi1g46670	http://genomevolution.org/r/26gn	No Gene Identified by Maizesequence.org	NA
a1	112	anthocyaninless1	Y	http://www.maizegdb.org/cgi-bin/displaylocusrecord.cgi?id=12000	X05068	chr3	-1	GRMZM2G026930	1	Good	http://genomevolution.org/r/25g6		GRMZM2G013726	Sb03g028890	PAC:18178383	Os01g44260	Bradi2g44480	http://genomevolution.org/r/25g7	GRMZM2G472869	Different Assignment	http://genomevolution.org/r/26jl	Two independent GenBank records for a1 hit the gene we identified. Noncoding sequence upstream of the annotated CDS in one genbank record also hits maizesequence.org gene model. Our gene is located on the correct chromosome per maizegdb locus page	maizesequence.org gene is not.
sh2	112	shrunken2	Y	http://www.maizegdb.org/cgi-bin/displaylocusrecord.cgi?id=12635	M81603	chr3	-1	GRMZM2G429899	1	extra (coding)exons in maizesequence.org	http://genomevolution.org/r/25yt		chr8:146010807-146161590	Sb03g028850	PAC:18179768	Os01g44220	chr2:44334929-45001469	http://genomevolution.org/r/26ix	GRMZM2G429899	Identical Assignment
c1	106	colored aleurone1	Y	http://www.maizegdb.org/cgi-bin/displaylocusrecord.cgi?id=12101	X52201	chr9	-1	GRMZM2G005066	1	Missing 3' UTR in maizesequence.org	http://genomevolution.org/r/25da		GRMZM2G701063	Sb10g006700	PAC:18198924	Os06g10350	chr1:44862834-45114808	http://genomevolution.org/r/26f5	No Gene Identified by Maizesequence.org	NA
r1	101	colored1	Y	http://www.maizegdb.org/cgi-bin/displaylocusrecord.cgi?id=12621	X15806	chr10	1	GRMZM5G822829	2	Good||lc1	http://genomevolution.org/r/2614		GRMZM2G172795	Sb06g025060	PAC:18202973	Os04g47059	chr5:20758637-21209681	http://genomevolution.org/r/26j2	No Gene Identified by Maizesequence.org	NA
kn1	100	knotted1	Y	http://www.maizegdb.org/cgi-bin/displaylocusrecord.cgi?id=12352	X61308	chr1	-1	GRMZM2G017087	1	Missing 5' UTR	http://genomevolution.org/r/25ey		chr5:9139999-9295991	Sb01g009480	PAC:18190710	Os03g51690	Bradi1g10050	http://genomevolution.org/r/26fe	GRMZM2G017087	Identical Assignment
su1	83	sugary1	Y	http://www.maizegdb.org/cgi-bin/displaylocusrecord.cgi?id=12664	U18908	chr4	1	GRMZM2G138060	2	Missing 5' coding region?	http://genomevolution.org/r/25ra		chr1:190092103-190239690	Sb07g027200	PAC:18187070	Os08g40930	Bradi3g40410	http://genomevolution.org/r/25rb	No Gene Identified by Maizesequence.org	NA
b1	78	colored plant1	Y	http://www.maizegdb.org/cgi-bin/displaylocusrecord.cgi?id=12065	X57276	chr2	1	GRMZM2G172795	1	Missing internal exon (gene model and pseudomolecule)	http://genomevolution.org/r/25v7		GRMZM5G822829	Sb06g025060	PAC:18202973	Os04g47059	chr5:20877277-21224959	http://genomevolution.org/r/26i8	No Gene Identified by Maizesequence.org	NA
bz2	72	bronze2	Y	http://www.maizegdb.org/cgi-bin/displaylocusrecord.cgi?id=12099	U14599	chr1	-1	GRMZM2G016241	1	Good	http://genomevolution.org/r/25eq		chr5:33995109-34132444	Sb01g022080	PAC:18193433	chr10:13445230-14195619	chr3:26596665-27487768	http://genomevolution.org/r/26fc	GRMZM2G016241	Identical Assignment
c2	69	colorless2	Y	http://www.maizegdb.org/cgi-bin/displaylocusrecord.cgi?id=12102	X60205	chr4	1	GRMZM2G422750	1	Good	http://genomevolution.org/r/25yp		GRMZM5G818346	Sb05g020150	PAC:18202072	Os11g32650	no synteny	http://genomevolution.org/r/25yq	GRMZM2G422750	Identical Assignment
pl1	65	purple plant1	Y	http://www.maizegdb.org/cgi-bin/displaylocusrecord.cgi?id=12553	AF015268	chr6	1	GRMZM2G701063	2	Good	http://genomevolution.org/r/25zn		GRMZM2G005066	Sb10g006700	PAC:18198924	Os06g10350	chr1:44356779-45000135	http://genomevolution.org/r/26j1	No Gene Identified by Maizesequence.org	NA
vp1	62	viviparous1	Y	http://www.maizegdb.org/cgi-bin/displaylocusrecord.cgi?id=12731	M60214	chr3	1	GRMZM2G133398	1	Good	http://genomevolution.org/r/25qy		chr8:162794487-162905105	Sb03g043480	PAC:18176590	Os01g68370	Bradi2g58390	http://genomevolution.org/r/26hh	GRMZM2G133398	Identical Assignment
adh2	57	alcohol dehydrogenase2		http://www.maizegdb.org/cgi-bin/displaylocusrecord.cgi?id=12022	X02915	chr4	-1	GRMZM2G098346	1	Good	http://genomevolution.org/r/25nc		too big a gap	Sb05g009360	PAC:18200336	Os11g10480	Bradi4g22610	http://genomevolution.org/r/26gv	GRMZM2G098346	Identical Assignment
ae1	55	amylose extender1		http://www.maizegdb.org/cgi-bin/displaylocusrecord.cgi?id=12028	L08065	chr5		GRMZM2G032628	1	Good	http://genomevolution.org/r/25gk		GRMZM2G073054	Sb04g021540	PAC:18174084	Os02g32660	Bradi3g44760	http://genomevolution.org/r/25gl	GRMZM2G039942	Different Assignment	http://genomevolution.org/r/26jn	Two independent GenBank records for ae1 hit the gene we identified. 3' non-coding sequence from one GenBank record hits near but not on the maizesequence.org. The location of our gene agrees with the genetic location of ae1 on its maizegdb locus page	maizesequence.org gene does not.
bt2	49	brittle endosperm2	Y	http://www.maizegdb.org/cgi-bin/displaylocusrecord.cgi?id=12092	AF544167	chr4	-1	GRMZM2G068506	2	Good|potentially missing upstream exons	http://genomevolution.org/r/25jm		no synteny	too big a gap	no synteny	no synteny	no synteny	http://genomevolution.org/r/25jn	No Gene Identified by Maizesequence.org	NA
fl2	44	floury2	Y	http://www.maizegdb.org/cgi-bin/displaylocusrecord.cgi?id=12225	L34340	chr4	-1	GRMZM2G397687	1	Good	http://genomevolution.org/r/25y3	GRMZM2G397678	no synteny	too big a gap	too big a gap	too big a gap	too big a gap	http://genomevolution.org/r/25y4	No Gene Identified by Maizesequence.org	NA
sus1	44	sucrose synthase1		http://www.maizegdb.org/cgi-bin/displaylocusrecord.cgi?id=41166	L33244	chr9	-1	GRMZM2G152908	2	Good	http://genomevolution.org/r/25sp		chr1:69537905-69750049	Sb01g033060	PAC:18195129	Os03g28330	Bradi1g60320	http://genomevolution.org/r/25sq	GRMZM2G152908	Identical Assignment
bt1	43	brittle endosperm1	Y	http://www.maizegdb.org/cgi-bin/displaylocusrecord.cgi?id=12091	M79333	chr5	-1	GRMZM2G144081	1	Good	http://genomevolution.org/r/25rv		chr4:231949546-232075734	Sb04g007010	no synteny	no synteny	no synteny	http://genomevolution.org/r/25rw	No Gene Identified by Maizesequence.org	NA
pep1	42	phosphoenolpyruvate carboxylase1		http://www.maizegdb.org/cgi-bin/displaylocusrecord.cgi?id=12531	X15238	chr9	1	GRMZM2G083841	1	Good	http://genomevolution.org/r/25l4		chr6:105702922-105892894	Sb10g021330	PAC:18197862	chr6:19969223-20504683	no synteny	http://genomevolution.org/r/26gf	No Gene Identified by Maizesequence.org	NA
vp5	42	viviparous5	Y	http://www.maizegdb.org/cgi-bin/displaylocusrecord.cgi?id=12733	AF039585	chr1	1	GRMZM2G410515	1	Can't proof	http://genomevolution.org/r/25yh		chr9:149941484-150053631	Sb01g044990	PAC:18194286	Os03g08570	Bradi1g72400	http://genomevolution.org/r/26iu	No Gene Identified by Maizesequence.org	NA
an1	40	anther ear1	Y	http://www.maizegdb.org/cgi-bin/displaylocusrecord.cgi?id=12048	L37750	chr1	1	GRMZM2G081554	1	Good	http://genomevolution.org/r/25kq		chr5:33845722-34017985	Sb01g021990	PAC:18194042	chr10:13517249-14258420	too big a gap	http://genomevolution.org/r/26ga	No Gene Identified by Maizesequence.org	NA
cat1	38	catalase1		http://www.maizegdb.org/cgi-bin/displaylocusrecord.cgi?id=12108	X60135	chr5	1	GRMZM2G088212	1	Good	http://genomevolution.org/r/25m4		AC187409.4_FG008	Sb10g030840	PAC:18197582	Os06g51150	Bradi1g29800	http://genomevolution.org/r/25m5	No Gene Identified by Maizesequence.org	NA
cat3	37	catalase3		http://www.maizegdb.org/cgi-bin/displaylocusrecord.cgi?id=12110	L05934	chr4	1	GRMZM2G079348	2	Good	http://genomevolution.org/r/25ki		chr5:69273834-69377324	Sb04g001130	PAC:18174069	Os02g02400	Bradi3g01470	http://genomevolution.org/r/25kj	No Gene Identified by Maizesequence.org	NA
glu1	37	beta glucosidase1		http://www.maizegdb.org/cgi-bin/displaylocusrecord.cgi?id=12268	U33816	chr10	1	GRMZM2G016890	1	Good	http://genomevolution.org/r/25eu	GRMZM2G014844||GRMZM2G119460	GRMZM2G120962	Sb08g007586	no synteny	no synteny	no synteny	http://genomevolution.org/r/25ev	GRMZM2G016890	Identical Assignment
tb1	37	teosinte branched1	Y	http://www.maizegdb.org/cgi-bin/displaylocusrecord.cgi?id=12671	U94494	chr1	1	AC233950.1_FG002	1	Good	http://genomevolution.org/r/25ce		GRMZM2G324986	Sb01g010690	PAC:18193228	Os03g49880	Bradi1g11060	http://genomevolution.org/r/26f1	AC233950.1_FG002	Identical Assignment
gl1	36	glossy1	Y	http://www.maizegdb.org/cgi-bin/displaylocusrecord.cgi?id=12242	U37428	chr7	1	GRMZM2G114642	1	Good	http://genomevolution.org/r/25p8		chr2:182572565-182683590	Sb02g025220	PAC:18181405	Os09g25850	Bradi4g30750	http://genomevolution.org/r/25p9	GRMZM2G114642	Identical Assignment
bm3	34	brown midrib3	Y	http://www.maizegdb.org/cgi-bin/displaylocusrecord.cgi?id=12081	M73235	chr4	-1	AC196475.3_FG004	2	Good	http://genomevolution.org/r/25bq		chr10:78080658-78371921	Sb07g003860	PAC:18186460	Os08g06100	Bradi3g16530	http://genomevolution.org/r/262i	No Gene Identified by Maizesequence.org	NA
rp1	34	resistance to Puccinia sorghi1		http://www.maizegdb.org/cgi-bin/displaylocusrecord.cgi?id=12609	AF107293	chr10	-1	AC152495.1_FG002	1	5' and 3' UTR exons missed by maizesequence.org	http://genomevolution.org/r/25bk	AC152495.1_FG003||GRMZM2G003625||GRMZM2G005134||GRMZM2G061742||GRMZM2G069382||GRMZM2G083246||GRMZM2G083258||GRMZM2G165720||GRMZM5G833046	chr3:231943289-232094903	Sb08g002410	no synteny	no synteny	no synteny	http://genomevolution.org/r/262f	No Gene Identified by Maizesequence.org	NA
rs1	34	rough sheath1	Y	http://www.maizegdb.org/cgi-bin/displaylocusrecord.cgi?id=12616	L44133	chr7	1	GRMZM2G028041	1	Good	http://genomevolution.org/r/25ga		GRMZM2G452178	Sb02g002200	PAC:18182870	Os07g03770	Bradi1g57610	http://genomevolution.org/r/26fl	GRMZM2G028041	Identical Assignment
abp1	33	auxin binding protein1		http://www.maizegdb.org/cgi-bin/displaylocusrecord.cgi?id=12008	L08425	chr3	1	GRMZM2G116204	2	Good	http://genomevolution.org/r/25pc		GRMZM2G078508	Sb08g016760	PAC:18189448	too big a gap	Bradi4g06030	http://genomevolution.org/r/25pd	GRMZM2G116204	Identical Assignment
cat2	32	catalase2		http://www.maizegdb.org/cgi-bin/displaylocusrecord.cgi?id=12109	X54819	chr1	-1	GRMZM2G090568	1	Good	http://genomevolution.org/r/25me		chr9:151513929-151692595	Sb01g048280	PAC:18191261	Os03g03910	Bradi1g76330	http://genomevolution.org/r/25mf	GRMZM2G090568	Identical Assignment
ts2	32	tassel seed2	Y	http://www.maizegdb.org/cgi-bin/displaylocusrecord.cgi?id=12691	L20621	chr1	1	GRMZM2G455809	1	Good	http://genomevolution.org/r/25z5		GRMZM2G308351	Sb01g038050	PAC:18190283	Os03g18740	Bradi1g64990	http://genomevolution.org/r/25z6	No Gene Identified by Maizesequence.org	NA
dek1	31	defective kernel1	Y	http://www.maizegdb.org/cgi-bin/displaylocusrecord.cgi?id=12148	AY061806	chr1	1	GRMZM2G321753	1	Good	http://genomevolution.org/r/25wd		chr9:136720786-136828257	Sb01g037910	PAC:18194992	chr3:10491680-10834228	chr1:63751534-64108197	http://genomevolution.org/r/26if	GRMZM2G321753	Identical Assignment
lg3	31	liguleless3	Y	http://www.maizegdb.org/cgi-bin/displaylocusrecord.cgi?id=12388	AF100455	chr3	1	GRMZM2G087741	1	Good	http://genomevolution.org/r/25ly		chr8:36499080-36776428	Sb03g012480	PAC:18178064	Os01g19694	Bradi2g11540	http://genomevolution.org/r/26gm	GRMZM2G087741	Identical Assignment
du1	30	dull endosperm1	Y	http://www.maizegdb.org/cgi-bin/displaylocusrecord.cgi?id=12197	AF023159	chr10	1	GRMZM2G141399	1	Good	http://genomevolution.org/r/25rn		chr4:28021699-28172114	Sb07g005400	PAC:18187605	Os08g09230	Bradi3g15030	http://genomevolution.org/r/26hm	No Gene Identified by Maizesequence.org	NA
a2	28	anthocyaninless2	Y	http://www.maizegdb.org/cgi-bin/displaylocusrecord.cgi?id=12006	X55314	chr5	1	GRMZM2G345717	1	Good	http://genomevolution.org/r/25x1		no synteny	Sb04g000260	PAC:18174388	chr2:0-600403	chr3:0-692326	http://genomevolution.org/r/26ij	No Gene Identified by Maizesequence.org	NA
oy1	28	oil yellow1	Y	http://www.maizegdb.org/cgi-bin/displaylocusrecord.cgi?id=12515	DQ084025	chr10	-1	GRMZM2G419806	1	Good	http://genomevolution.org/r/25yl		chr3:141438098-141616522	Sb08g004300	PAC:18189357	chr12:3388067-4083733	chr4:45277053-45732054	http://genomevolution.org/r/26iv	GRMZM2G419806	Identical Assignment
d8	27	dwarf plant8	Y	http://www.maizegdb.org/cgi-bin/displaylocusrecord.cgi?id=12143	AY103865	chr1	1	GRMZM2G144744	1	Good	http://genomevolution.org/r/25rx		GRMZM2G024973	Sb01g010660	PAC:18190750	Os03g49990	Bradi1g11090	http://genomevolution.org/r/25ry	No Gene Identified by Maizesequence.org	NA
glb1	27	globulin1		http://www.maizegdb.org/cgi-bin/displaylocusrecord.cgi?id=12265	U28017	chr1	1	GRMZM2G067919	1	Good	http://genomevolution.org/r/25jk		chr5:14559084-14701706	Sb01g012640	PAC:18193532	Os03g46100	Bradi1g13040	http://genomevolution.org/r/25jl	No Gene Identified by Maizesequence.org	NA
lc1	27	red leaf color1		http://www.maizegdb.org/cgi-bin/displaylocusrecord.cgi?id=12371	M26227	chr10	1	GRMZM5G822829	2	Good|lc1	http://genomevolution.org/r/25zv		GRMZM2G172795	Sb06g025060	PAC:18202973	Os04g47059	chr5:20758637-21209681	http://genomevolution.org/r/26j2	No Gene Identified by Maizesequence.org	NA
lg1	27	liguleless1	Y	http://www.maizegdb.org/cgi-bin/displaylocusrecord.cgi?id=12386	AF451895	chr2	-1	GRMZM2G036297	1	Good|upstream sequence on wrong contig	http://genomevolution.org/r/25gw		GRMZM2G058588	Sb06g031290	PAC:18205642	Os04g56170	Bradi5g24670	http://genomevolution.org/r/25gx	GRMZM2G036297	Identical Assignment
ps1	27	pink scutellum1	Y	http://www.maizegdb.org/cgi-bin/displaylocusrecord.cgi?id=12562	AY206862	chr5	-1	GRMZM5G849107	1	Good	http://genomevolution.org/r/260k	GRMZM2G403196	chr4:234355954-234475131	Sb04g006120	PAC:18174000	Os02g09750	Bradi3g06600	http://genomevolution.org/r/26j6	No Gene Identified by Maizesequence.org	NA
rf2	27	restorer of fertility2	Y	http://www.maizegdb.org/cgi-bin/displaylocusrecord.cgi?id=12595	U43082	chr9	1	GRMZM2G058675	1	Good	http://genomevolution.org/r/25is		chr6:116073729-116329671	Sb10g009790	too big a gap	Os06g15990	Bradi1g43770	http://genomevolution.org/r/25it	GRMZM2G058675	Identical Assignment
su2	27	sugary2	Y	http://www.maizegdb.org/cgi-bin/displaylocusrecord.cgi?id=12665	AY499410	chr6	1	GRMZM2G348551	2	5' UTR and upsteam sequence missing	http://genomevolution.org/r/25x3		GRMZM2G105791	Sb10g008200	PAC:18197830	Os06g12450	Bradi1g45130	http://genomevolution.org/r/25x4	No Gene Identified by Maizesequence.org	NA
zpl2b	27	zein polypeptidesL2b		http://www.maizegdb.org/cgi-bin/displaylocusrecord.cgi?id=12803	AF371270	chr4	1	GRMZM2G404459	1	Good	http://genomevolution.org/r/25yd	GRMZM2G018193||GRMZM2G053120||GRMZM2G059620||GRMZM2G353268||GRMZM2G353272||GRMZM2G489581||GRMZM2G514379||GRMZM2G514469||GRMZM2G514479||GRMZM2G514485||GRMZM2G518465||GRMZM2G545000||GRMZM2G586611	no synteny	too big a gap	too big a gap	chr11:22583954-23404386	chr4:13981643-14703223	http://genomevolution.org/r/26de	No Gene Identified by Maizesequence.org	NA
whp1	26	white pollen1	Y	http://www.maizegdb.org/cgi-bin/displaylocusrecord.cgi?id=12750	X60204	chr2	-1	GRMZM2G151227	2	Good	http://genomevolution.org/r/25sd	GRMZM2G027130||GRMZM5G818346	too big a gap	too big a gap	too big a gap	Os11g32540	Bradi4g17230	http://genomevolution.org/r/26ah	No Gene Identified by Maizesequence.org	NA
d3	25	dwarf plant3	Y	http://www.maizegdb.org/cgi-bin/displaylocusrecord.cgi?id=12141	U32579	chr9	1	GRMZM2G093195	1	Good	http://genomevolution.org/r/25mw		chr6:57352079-57627496	Sb10g000920	chr10:125337-554559	Os06g02019	Bradi1g51780	http://genomevolution.org/r/26gs	No Gene Identified by Maizesequence.org	NA
mn1	25	miniature seed1	Y	http://www.maizegdb.org/cgi-bin/displaylocusrecord.cgi?id=12429	AF050631	chr2	1	GRMZM2G119689	1	Good|probably	http://genomevolution.org/r/25py		GRMZM2G095725	too big a gap	PAC:18205174	Os04g33740	Bradi5g09440	http://genomevolution.org/r/25pz	No Gene Identified by Maizesequence.org	NA
hm1	24	Helminthosporium carbonum susceptibility1		http://www.maizegdb.org/cgi-bin/displaylocusrecord.cgi?id=12327	L02540	chr1	1	GRMZM5G881887	1	Good	http://genomevolution.org/r/260w		too big a gap	Sb07g023130	too big a gap	too big a gap	too big a gap	http://genomevolution.org/r/26j9	GRMZM5G881887	Identical Assignment
mdh4	24	malate dehydrogenase4		http://www.maizegdb.org/cgi-bin/displaylocusrecord.cgi?id=12416	AA051891	chr1	-1	GRMZM2G415359	1	Can't proof	http://genomevolution.org/r/25yj		chr5:28284550-29105210	Sb01g019280	PAC:18196158	Os10g33800	Bradi3g28820	http://genomevolution.org/r/25yk	No Gene Identified by Maizesequence.org	NA
hrg1	23	hydroxyproline rich glycoprotein1		http://www.maizegdb.org/cgi-bin/displaylocusrecord.cgi?id=12329	X63134	chr2	-1	GRMZM2G168651	1	Good	http://genomevolution.org/r/25ul		chr10:115098059-115489530	Sb06g016310	chr6:19404984-19923515	Os04g34170	Bradi5g09790	http://genomevolution.org/r/26i5	No Gene Identified by Maizesequence.org	NA
ts6	23	tasselseed6	Y	http://www.maizegdb.org/cgi-bin/displaylocusrecord.cgi?id=12694	AF048900	chr1	1	GRMZM5G862109	1	Good	http://genomevolution.org/r/260q	GRMZM5G880027	chr5:2489170-2634044	Sb01g003400	PAC:18194463	Os03g60430	Bradi1g03880	http://genomevolution.org/r/26j8	No Gene Identified by Maizesequence.org	NA
dhn1	22	dehydrin1		http://www.maizegdb.org/cgi-bin/displaylocusrecord.cgi?id=12580	X15290	chr6	-1	GRMZM2G079440	1	Good	http://genomevolution.org/r/25kk		too big a gap	Sb09g018420	chr9:13429273-14363327	chr5:17019836-17955366	chr2:26011100-27060633	http://genomevolution.org/r/26g9	GRMZM2G079440	Identical Assignment
lg2	22	liguleless2	Y	http://www.maizegdb.org/cgi-bin/displaylocusrecord.cgi?id=12387	AY180106	chr3	1	GRMZM2G060216	1	Good	http://genomevolution.org/r/25iy		AC232238.2_FG004	Sb03g040530	PAC:18176817	Os01g64020	Bradi2g55570	http://genomevolution.org/r/25iz	GRMZM2G060216	Identical Assignment
zag1	22	Zea AGAMOUS homolog1		http://www.maizegdb.org/cgi-bin/displaylocusrecord.cgi?id=51346	L18924	chr6	-1	GRMZM2G052890	1	Good	http://genomevolution.org/r/25i4	GRMZM2G052937	too big a gap	Sb09g006360	PAC:18169585	Os05g11414	Bradi2g32910	http://genomevolution.org/r/25i5	GRMZM2G052890	Identical Assignment
gl8	21	glossy8	Y	http://www.maizegdb.org/cgi-bin/displaylocusrecord.cgi?id=12263	U89509	chr5	-1	AC205703.4_FG006	1	Good	http://genomevolution.org/r/25by		GRMZM2G087323	Sb04g025020	PAC:18171373	Os02g38440	Bradi3g47840	http://genomevolution.org/r/25bz	No Gene Identified by Maizesequence.org	NA
gpc1	21	glyceraldehyde-3-phosphate dehydrogenase1		http://www.maizegdb.org/cgi-bin/displaylocusrecord.cgi?id=12273	X15596	chr4	-1	GRMZM2G046804	2	Good	http://genomevolution.org/r/25hq		GRMZM2G309356	Sb07g002220	PAC:18185953	Os08g03290	Bradi3g14120	http://genomevolution.org/r/25hr	No Gene Identified by Maizesequence.org	NA
hcf106	21	high chlorophyll fluorescence106		http://www.maizegdb.org/cgi-bin/displaylocusrecord.cgi?id=12290	AF027808	chr2	1	GRMZM5G898735	1	Good	http://genomevolution.org/r/2610		GRMZM2G151529	Sb06g014410	no synteny	chr4:19032798-19318750	chr5:11499220-11629016	http://genomevolution.org/r/26ja	GRMZM5G898735	Identical Assignment
cr4	20	crinkly4	Y	http://www.maizegdb.org/cgi-bin/displaylocusrecord.cgi?id=25017	U67422	chr10	1	GRMZM2G051637	1	Good	http://genomevolution.org/r/25i0		chr3:231425129-231653501	Sb08g003290	no synteny	chr12:2558011-3036894	Bradi4g41920	http://genomevolution.org/r/26fw	GRMZM2G051637	Identical Assignment
gst1	20	glutathione-S-transferase1		http://www.maizegdb.org/cgi-bin/displaylocusrecord.cgi?id=65345	X06754	chr8	1	GRMZM2G116273	2	Good	http://genomevolution.org/r/25pe		GRMZM2G156877	Sb03g035420	PAC:18175642	Os01g55830	Bradi2g50760	http://genomevolution.org/r/25pf	GRMZM2G116273	Identical Assignment
id1	20	indeterminate growth1	Y	http://www.maizegdb.org/cgi-bin/displaylocusrecord.cgi?id=12337	AF058757	chr1	-1	GRMZM2G011357	1	Good	http://genomevolution.org/r/25dy		chr5:33236505-33343850	Sb01g021480	PAC:18191878	Os10g28330	Bradi3g26910	http://genomevolution.org/r/26f7	No Gene Identified by Maizesequence.org	NA
mdh2	20	malate dehydrogenase2		http://www.maizegdb.org/cgi-bin/displaylocusrecord.cgi?id=12414	AY103861	chr6	-1	GRMZM2G154595	1	Good	http://genomevolution.org/r/25st		chr8:72698131-72983403	Sb09g029240	PAC:18167991	Os05g49880	Bradi2g15740	http://genomevolution.org/r/25su	No Gene Identified by Maizesequence.org	NA
ra1	20	ramosa1	Y	http://www.maizegdb.org/cgi-bin/displaylocusrecord.cgi?id=12577	AY957396	chr7	1	GRMZM2G003927	1	Good	http://genomevolution.org/r/25d4		chr2:179695452-179860237	Sb02g024400	PAC:18181127	chr9:14417584-14918349	chr4:35561970-36022395	http://genomevolution.org/r/26f3	No Gene Identified by Maizesequence.org	NA
te1	20	terminal ear1	Y	http://www.maizegdb.org/cgi-bin/displaylocusrecord.cgi?id=12673	AF047852	chr3	-1	GRMZM2G085113	1	Good	http://genomevolution.org/r/25le		chr8:163425671-163563084	Sb03g043230	PAC:18179083	Os01g68000	Bradi2g58100	http://genomevolution.org/r/26gh	GRMZM2G085113	Identical Assignment
nnr1	19	nitrate reductase(NADH)1		http://www.maizegdb.org/cgi-bin/displaylocusrecord.cgi?id=25900	M77792	chr4	1	GRMZM2G568636	2	Good	http://genomevolution.org/r/25zl		GRMZM2G076723	Sb07g022750	PAC:18187549	Os08g36480	Bradi3g37940	http://genomevolution.org/r/25zm	No Gene Identified by Maizesequence.org	NA
ns1	19	narrow sheath1	Y	http://www.maizegdb.org/cgi-bin/displaylocusrecord.cgi?id=61077	AJ536578	chr2	1	GRMZM2G069028	2	Good	http://genomevolution.org/r/25jo		chr4:190002890-190313390	Sb05g003490	no synteny	no synteny	no synteny	http://genomevolution.org/r/25jp	No Gene Identified by Maizesequence.org	NA
sn1	19	scutellar node color1		http://www.maizegdb.org/cgi-bin/displaylocusrecord.cgi?id=12643	X60706	chr10	1	GRMZM5G822829	2	Good|lc1	http://genomevolution.org/r/25zx		GRMZM2G172795	Sb06g025060	PAC:18202973	Os04g47059	chr5:20758637-21209681	http://genomevolution.org/r/26j2	No Gene Identified by Maizesequence.org	NA
afd1	18	absence of first division1		http://www.maizegdb.org/cgi-bin/displaylocusrecord.cgi?id=12029	AY788900	chr6	1	GRMZM2G059037	1	Good	http://genomevolution.org/r/25iu		too big a gap	Sb09g029640	PAC:18169550	Os05g50410	Bradi2g15000	http://genomevolution.org/r/25iv	No Gene Identified by Maizesequence.org	NA
chi1	18	chalcone flavanone isomerase1		http://www.maizegdb.org/cgi-bin/displaylocusrecord.cgi?id=56908	Z22760	chr1	-1	GRMZM2G155329	1	Good	http://genomevolution.org/r/25t5		GRMZM2G119186	Sb01g003330	PAC:18191923	Os03g60509	Bradi1g03840	http://genomevolution.org/r/25t6	No Gene Identified by Maizesequence.org	NA
ssu1	18	ribulose bisphosphate carboxylase small subunit1		http://www.maizegdb.org/cgi-bin/displaylocusrecord.cgi?id=12660	X06535	chr4	-1	GRMZM2G098520	1	Good	http://genomevolution.org/r/25ne		GRMZM2G113033	Sb05g003480	too big a gap	too big a gap	no synteny	http://genomevolution.org/r/25nf	GRMZM2G098520	Identical Assignment
tan1	18	tangled1	Y	http://www.maizegdb.org/cgi-bin/displaylocusrecord.cgi?id=12573	AF305892	chr6	-1	GRMZM2G039113	1	Good	http://genomevolution.org/r/25ha		chr8:113583954-115283766	Sb09g018850	chr9:15243100-16118097	chr5:18275913-19077686	chr2:25065226-25832415	http://genomevolution.org/r/2654	GRMZM2G039113	Identical Assignment
ts4	18	tasselseed4	Y	http://www.maizegdb.org/cgi-bin/displaylocusrecord.cgi?id=12692	GQ905588	chr3	1	GRMZM5G803935	1	why does a microRNA have a CDS?	http://genomevolution.org/r/261d		chr8:156584896-157320339	chr3:73688749-74313024	chr3:45544758-45931421	chr1:42689358-43324564	chr2:58526614-58975721	http://genomevolution.org/r/26es	No Gene Identified by Maizesequence.org	NA
g2	17	golden plant2	Y	http://www.maizegdb.org/cgi-bin/displaylocusrecord.cgi?id=12229	AF298118	chr3	1	GRMZM2G087804	1	Good	http://genomevolution.org/r/25m0	GRMZM2G087961	chr8:29564530-29765690	Sb03g000400	PAC:18177229	Os01g13740	Bradi2g08290	http://genomevolution.org/r/25m1	No Gene Identified by Maizesequence.org	NA
gpa1	17	glyceraldehyde-3-phosphate dehydrogenase1		http://www.maizegdb.org/cgi-bin/displaylocusrecord.cgi?id=12272	X07157	chr2	-1	GRMZM2G337113	1	Good	http://genomevolution.org/r/25wp	GRMZM2G337196	GRMZM2G337196	Sb06g018880	PAC:18205245	Os04g38600	Bradi5g12330	http://genomevolution.org/r/25wq	GRMZM2G337113	Identical Assignment
orp1	17	orange pericarp1	Y	http://www.maizegdb.org/cgi-bin/displaylocusrecord.cgi?id=12512	M76684	chr4	-1	GRMZM2G169593	2	Good	http://genomevolution.org/r/25ur	GRMZM5G896346	GRMZM2G005024	Sb07g002770	PAC:18186811	Os08g04180	Bradi3g14490	http://genomevolution.org/r/25us	No Gene Identified by Maizesequence.org	NA
sod4	17	superoxide dismutase4		http://www.maizegdb.org/cgi-bin/displaylocusrecord.cgi?id=12648	X17565	chr1	1	GRMZM2G169890	1	Good	http://genomevolution.org/r/25ut		GRMZM2G058522	Sb01g035350	PAC:18195462	Os03g22810	chr1:61177186-61692813	http://genomevolution.org/r/26i7	No Gene Identified by Maizesequence.org	NA
tua1	17	alpha tubulin1		http://www.maizegdb.org/cgi-bin/displaylocusrecord.cgi?id=12697	X63176	chr5	-1	AC195340.3_FG001	2	Good	http://genomevolution.org/r/25bo		chr1:282357761-282457761	Sb01g006710	PAC:18194413	Os03g56810	Bradi1g07200	http://genomevolution.org/r/26ew	No Gene Identified by Maizesequence.org	NA
acc1	16	acetyl-coenzyme A carboxylase1		http://www.maizegdb.org/cgi-bin/displaylocusrecord.cgi?id=12011	Z24449	chr2	1	GRMZM5G858094	NA	Good	http://genomevolution.org/r/260m		too big a gap	no synteny	no synteny	no synteny	no synteny	http://genomevolution.org/r/260n	GRMZM5G858094	Identical Assignment
ald1	16	aldolase1		http://www.maizegdb.org/cgi-bin/displaylocusrecord.cgi?id=25011	X12872	chr3	1	GRMZM2G057823	1	Good	http://genomevolution.org/r/25ii		GRMZM2G066024	Sb03g043140	PAC:18178636	Os01g67860	Bradi2g58050	http://genomevolution.org/r/25ij	GRMZM2G057823	Identical Assignment
bm1	16	brown midrib1	Y	http://www.maizegdb.org/cgi-bin/displaylocusrecord.cgi?id=12079	AJ005702	chr5	-1	GRMZM5G844562	1	Good	http://genomevolution.org/r/260e	GRMZM5G868202	chr4:234516765-234621179	Sb04g005950	PAC:18174304	Os02g09490	Bradi3g06480	http://genomevolution.org/r/260f	No Gene Identified by Maizesequence.org	NA
gl15	16	glossy15	Y	http://www.maizegdb.org/cgi-bin/displaylocusrecord.cgi?id=12247	U41466	chr9	1	GRMZM2G160730	1	Good|neither transcript completely accurate	http://genomevolution.org/r/25tv		chr6:97182227-97322477	Sb10g025053	PAC:18197224	Os06g43220	Bradi1g30340	http://genomevolution.org/r/26hz	No Gene Identified by Maizesequence.org	NA
gl2	16	glossy2	Y	http://www.maizegdb.org/cgi-bin/displaylocusrecord.cgi?id=12252	AY109951	chr2	-1	GRMZM2G098239	1	Good	http://genomevolution.org/r/25n6	GRMZM5G867147	chr10:141866441-141991403	Sb06g028160	PAC:18204529	Os04g52164	Bradi5g21350	http://genomevolution.org/r/26gt	No Gene Identified by Maizesequence.org	NA
rld1	16	rolled leaf1	Y	http://www.maizegdb.org/cgi-bin/displaylocusrecord.cgi?id=30011	AY501430	chr9	-1	GRMZM2G109987	2	Good	http://genomevolution.org/r/25om		GRMZM2G042250	Sb01g050000	too big a gap	Os03g01890	no synteny	http://genomevolution.org/r/26h4	GRMZM2G109987	Identical Assignment
ubi2	16	ubiquitin2		http://www.maizegdb.org/cgi-bin/displaylocusrecord.cgi?id=26025	S94466	chr4	1	GRMZM2G419891	2	Good	http://genomevolution.org/r/25yn	GRMZM2G118637||GRMZM2G419844	GRMZM2G118637	Sb04g004260	PAC:18174495	Os02g06640	Bradi3g04730	http://genomevolution.org/r/25yo	No Gene Identified by Maizesequence.org	NA
zmm2	16	Zea mays MADS2		http://www.maizegdb.org/cgi-bin/displaylocusrecord.cgi?id=41345	X81200	chr8	-1	GRMZM2G359952	2	Good	http://genomevolution.org/r/25xb		GRMZM2G471089	Sb03g002525	PAC:18176984	Os01g10504	Bradi2g06330	http://genomevolution.org/r/25xc	No Gene Identified by Maizesequence.org	NA
zp27	16	27-kDa zein protein		http://www.maizegdb.org/cgi-bin/displaylocusrecord.cgi?id=58113	M16218	chr7	1	GRMZM2G138727	1	Good	http://genomevolution.org/r/25re	GRMZM2G438538	GRMZM2G060429	Sb02g025510	PAC:18180925	chr9:15882395-16462627	chr4:36700872-37221819	http://genomevolution.org/r/26hk	No Gene Identified by Maizesequence.org	NA
am1	15	ameiotic1		http://www.maizegdb.org/cgi-bin/displaylocusrecord.cgi?id=12041	DQ663482	chr5	1	GRMZM5G883855	2	Good	http://genomevolution.org/r/260y		chr1:260098992-260389679	Sb01g013215	PAC:18195042	Os03g44760	Bradi1g13530	http://genomevolution.org/r/260z	No Gene Identified by Maizesequence.org	NA
bx1	15	benzoxazinless1		http://www.maizegdb.org/cgi-bin/displaylocusrecord.cgi?id=12097	X76713	chr4	1	GRMZM2G085381	1	Good	http://genomevolution.org/r/25lg		no synteny	chr5:58868109-59571565	chr5:36542777-37504728	chr11:25708564-25959495	chr4:10814041-11688511	http://genomevolution.org/r/2673	GRMZM2G085381	Identical Assignment
eno1	15	enolase1		http://www.maizegdb.org/cgi-bin/displaylocusrecord.cgi?id=25430	X55981	chr9	1	GRMZM2G064302	1	Good	http://genomevolution.org/r/25j8		GRMZM2G446253	Sb10g002460	PAC:18199696	Os06g04510	Bradi1g51540	http://genomevolution.org/r/25j9	GRMZM2G064302	Identical Assignment
gst4	15	glutathione S-transferase4		http://www.maizegdb.org/cgi-bin/displaylocusrecord.cgi?id=69159	W49853	chr3	-1	GRMZM2G146246	1	Good	http://genomevolution.org/r/25s3	GRMZM5G849767	chr8:159649795-159755381	Sb03g044980	PAC:18178334	Os01g70770	Bradi2g59860	http://genomevolution.org/r/26ac	GRMZM2G146246	Identical Assignment
ij1	15	iojap striping1		http://www.maizegdb.org/cgi-bin/displaylocusrecord.cgi?id=12341	Z15063	chr7	-1	GRMZM2G004583	1	Good	http://genomevolution.org/r/25d6		chr2:190454718-190725264	Sb02g028720	PAC:18183086	Os09g32030	chr4:39634982-40329070	http://genomevolution.org/r/26f4	No Gene Identified by Maizesequence.org	NA
mgs1	15	male-gametophyte specific1		http://www.maizegdb.org/cgi-bin/displaylocusrecord.cgi?id=12425	S44171	chr10	-1	GRMZM2G317406	2	weird	http://genomevolution.org/r/25w9		GRMZM2G022347	Sb06g014740	PAC:18203031	Os04g32680	Bradi5g08410	http://genomevolution.org/r/25wa	GRMZM2G317406	Identical Assignment
pep4	15	phosphoenolpyruvate carboxylase4		http://www.maizegdb.org/cgi-bin/displaylocusrecord.cgi?id=30069	X61489	chr7	-1	GRMZM2G473001	1	Good	http://genomevolution.org/r/25zd		chr2:174901978-175030726	Sb02g021090	PAC:18181187	Os09g14670	Bradi4g27910	http://genomevolution.org/r/26iz	GRMZM2G473001	Identical Assignment
pex1	15	pollen extensin-like1		http://www.maizegdb.org/cgi-bin/displaylocusrecord.cgi?id=105329	Z34465	chr2	-1	GRMZM5G841015	2	Good	http://genomevolution.org/r/260a	GRMZM2G453012	GRMZM2G478920	too big a gap	too big a gap	no synteny	no synteny	http://genomevolution.org/r/26ea	No Gene Identified by Maizesequence.org	NA
ts1	15	tassel seed1	Y	http://www.maizegdb.org/cgi-bin/displaylocusrecord.cgi?id=12690	FJ360855	chr2	-1	GRMZM2G104843	1	Good	http://genomevolution.org/r/25o8		GRMZM2G070092	Sb06g018040	PAC:18205149	Os04g37430	Bradi5g11590	http://genomevolution.org/r/26h0	No Gene Identified by Maizesequence.org	NA
vp8	15	viviparous8	Y	http://www.maizegdb.org/cgi-bin/displaylocusrecord.cgi?id=12735	EU401893	chr1	1	GRMZM2G010353	1	Good	http://genomevolution.org/r/25ds		chr5:4540653-4656574	Sb01g005710	PAC:18190510	Os03g57660	Bradi1g06230	http://genomevolution.org/r/26f6	No Gene Identified by Maizesequence.org	NA
ivr2	14	invertase2		http://www.maizegdb.org/cgi-bin/displaylocusrecord.cgi?id=97587	AJ563384	chr5	1	GRMZM2G089836	1	Good	http://genomevolution.org/r/25ma	GRMZM5G863665||GRMZM5G890000	GRMZM2G463871	Sb04g000620	PAC:18170956	Os02g01590	Bradi3g00910	http://genomevolution.org/r/25mb	No Gene Identified by Maizesequence.org	NA
pal1	14	phenylalanine ammonia lyase homolog1		http://www.maizegdb.org/cgi-bin/displaylocusrecord.cgi?id=24853	M95077	chr5	-1	GRMZM2G074604	1	Can't proof	http://genomevolution.org/r/25ka	GRMZM2G029048||GRMZM2G170692||GRMZM2G334655||GRMZM2G334660	GRMZM2G063917	Sb04g026530	PAC:18172878	Os02g41680	Bradi3g49280	http://genomevolution.org/r/266k	No Gene Identified by Maizesequence.org	NA
pgd2	14	6-phosphogluconate dehydrogenase2		http://www.maizegdb.org/cgi-bin/displaylocusrecord.cgi?id=12541	AF061837	chr3	-1	GRMZM2G145715	1	Good	http://genomevolution.org/r/25s1		chr8:159364527-159539471	Sb03g045216	PAC:18175594	chr1:41194784-41479544	chr2:57291361-57599656	http://genomevolution.org/r/26ho	GRMZM2G127798	Different Assignment	http://genomevolution.org/r/26jx	Two independent GenBank records show greater sequence similarity to the gene we identified than the one identified by maizesequence.org. Our gene is located on the correct chromosome according to maizegdb.
ra2	14	ramosa2	Y	http://www.maizegdb.org/cgi-bin/displaylocusrecord.cgi?id=12578	BT035538	chr3	1	AC233943.1_FG002	1	UTR exon skipped my maizesequence.org	http://genomevolution.org/r/25cc		chr8:16720630-16902749	Sb03g004590	PAC:18177818	Os01g07480	Bradi2g04270	http://genomevolution.org/r/26f0	AC233943.1_FG002	Identical Assignment
sod3	14	superoxide dismutase3		http://www.maizegdb.org/cgi-bin/displaylocusrecord.cgi?id=12647	M33119	chr6	1	GRMZM2G059991	1	Good	http://genomevolution.org/r/25iw		chr8:111951684-113683954	too big a gap	PAC:18168219	Os05g25850	no synteny	http://genomevolution.org/r/25ix	No Gene Identified by Maizesequence.org	NA
tga1	14	teosinte glume architecture1	Y	http://www.maizegdb.org/cgi-bin/displaylocusrecord.cgi?id=30019	AY883559	chr4	1	GRMZM2G101511	2	Good	http://genomevolution.org/r/25ns	AC233751.1_FG002	chr1:193887423-194264951	Sb07g026220	PAC:18187658	Os08g41940	Bradi3g41250	http://genomevolution.org/r/2687	No Gene Identified by Maizesequence.org	NA
tpi4	14	triose phosphate isomerase4		http://www.maizegdb.org/cgi-bin/displaylocusrecord.cgi?id=12683	L00371	chr8	-1	GRMZM2G018177	2	Good	http://genomevolution.org/r/25f2		GRMZM2G030784	Sb03g006130	PAC:18178187	Os01g05490	Bradi2g03170	http://genomevolution.org/r/26fg	No Gene Identified by Maizesequence.org	NA
ys1	14	yellow stripe1	Y	http://www.maizegdb.org/cgi-bin/displaylocusrecord.cgi?id=12782	AF186234	chr5	-1	GRMZM2G156599	1	Good	http://genomevolution.org/r/25tb		chr4:150523936-150867960	Sb04g033345	PAC:18173965	Os02g43370	Bradi3g50260	http://genomevolution.org/r/26ax	GRMZM2G156599	Identical Assignment
zp1	14	zein alpha protein1		http://www.maizegdb.org/cgi-bin/displaylocusrecord.cgi?id=114061	X58700	chr4	1	GRMZM2G008913	2	Good|inversion in nongene sequence downstream of gene	http://genomevolution.org/r/25dk		too big a gap	too big a gap	chr7:4199018-5195813	too big a gap	chr3:13774253-14654833	http://genomevolution.org/r/263b	No Gene Identified by Maizesequence.org	NA
emp2	13	empty pericarp 2	Y	http://www.maizegdb.org/cgi-bin/displaylocusrecord.cgi?id=25913	AF494285	chr2	-1	GRMZM2G039155	2	Good	http://genomevolution.org/r/25hc		AC194174.3_FG003	Sb02g023500	PAC:18183966	Os09g20830	Bradi4g29260	http://genomevolution.org/r/25hd	GRMZM2G039155	Identical Assignment
gn1	13	gnarley1	Y	http://www.maizegdb.org/cgi-bin/displaylocusrecord.cgi?id=64424	AY312168	chr2	1	GRMZM2G452178	2	Good	http://genomevolution.org/r/25z3		GRMZM2G028041	Sb02g002200	PAC:18182870	Os03g56110	chr1:57050313-57583241	http://genomevolution.org/r/25z4	No Gene Identified by Maizesequence.org	NA
gpc3	13	glyceraldehyde-3-phosphate dehydrogenase3		http://www.maizegdb.org/cgi-bin/displaylocusrecord.cgi?id=12275	L13431	chr4	1	GRMZM2G071630	2	Good	http://genomevolution.org/r/25js	GRMZM2G072119	GRMZM2G176307	Sb04g025120	PAC:18171250	Os02g38920	chr3:49435893-49751745	http://genomevolution.org/r/25jt	No Gene Identified by Maizesequence.org	NA
hsp18f	13	heat shock protein18f		http://www.maizegdb.org/cgi-bin/displaylocusrecord.cgi?id=66502	X54076	chr3	-1	GRMZM2G083810	1	Good	http://genomevolution.org/r/25l2		GRMZM2G034157	Sb03g003530	PAC:18175500	Os01g08860	Bradi2g05380	http://genomevolution.org/r/26ge	GRMZM2G083810	Identical Assignment
ig1	13	indeterminate gametophyte1		http://www.maizegdb.org/cgi-bin/displaylocusrecord.cgi?id=12340	EF081454	chr3	-1	GRMZM2G118250	1	Good	http://genomevolution.org/r/25pu	GRMZM2G419929	GRMZM2G133806	Sb03g042310	PAC:18179844	Os01g66590	Bradi2g57380	http://genomevolution.org/r/26hb	No Gene Identified by Maizesequence.org	NA
lhcb1	13	light harvesting chlorophyll a/b binding protein1		http://www.maizegdb.org/cgi-bin/displaylocusrecord.cgi?id=25701	M87020	chr8	1	GRMZM2G351977	2	Can't proof	http://genomevolution.org/r/25x5		GRMZM2G406438	too big a gap	PAC:18176513	Os01g41710	chr2:43142710-43990546	http://genomevolution.org/r/26ct	No Gene Identified by Maizesequence.org	NA
orp2	13	orange pericarp2	Y	http://www.maizegdb.org/cgi-bin/displaylocusrecord.cgi?id=12513	M76685	chr10	-1	GRMZM2G005024	1	Split into two transcripts?	http://genomevolution.org/r/25d8		GRMZM2G169593	Sb07g002770	PAC:18186811	Os08g04180	Bradi3g14490	http://genomevolution.org/r/25d9	No Gene Identified by Maizesequence.org	NA
et1	12	etched1	Y	http://www.maizegdb.org/cgi-bin/displaylocusrecord.cgi?id=12218	AJ507104	chr3	-1	GRMZM2G157574	1	Good	http://genomevolution.org/r/25th	GRMZM5G887575	chr8:141862797-141979888	Sb03g027210	PAC:18179252	Os01g42050	Bradi2g42950	http://genomevolution.org/r/26hv	No Gene Identified by Maizesequence.org	NA
lls1	12	lethal leaf spot1	Y	http://www.maizegdb.org/cgi-bin/displaylocusrecord.cgi?id=12391	U77345	chr1	1	GRMZM2G339563	1	Good	http://genomevolution.org/r/25wx		chr9:152387084-152491999	Sb01g047120	PAC:18192897	Os03g05310	Bradi1g75270	http://genomevolution.org/r/26ii	GRMZM2G339563	Identical Assignment
sbe1	12	starch branching enzyme1		http://www.maizegdb.org/cgi-bin/displaylocusrecord.cgi?id=30166	D11081	chr5	-1	GRMZM2G088753	1	Good	http://genomevolution.org/r/25m6		GRMZM2G169073	Sb10g030776	PAC:18199001	Os06g51084	Bradi1g29850	http://genomevolution.org/r/25m7	GRMZM2G088753	Identical Assignment
sod2	12	superoxide dismutase2		http://www.maizegdb.org/cgi-bin/displaylocusrecord.cgi?id=25374	M54936	chr7	-1	GRMZM2G025992	1	Good	http://genomevolution.org/r/25fy	GRMZM2G027777	chr2:215465690-215570676	Sb02g042170	PAC:18183174	Os07g46990	Bradi1g18340	http://genomevolution.org/r/26fj	No Gene Identified by Maizesequence.org	NA
act1	11	actin1		http://www.maizegdb.org/cgi-bin/displaylocusrecord.cgi?id=12019	J01238	chr8	-1	GRMZM2G126010	2	Good	http://genomevolution.org/r/25qi	GRMZM2G126069	chr6:149075092-149213760	Sb09g021660	PAC:18170041	Os05g36290	Bradi2g24070	http://genomevolution.org/r/269k	No Gene Identified by Maizesequence.org	NA
gln1	11	glutamine synthetase1		http://www.maizegdb.org/cgi-bin/displaylocusrecord.cgi?id=61733	X65931	chr10	-1	GRMZM2G098290	2	Good	http://genomevolution.org/r/25n8		chr2:3921542-4024780	Sb06g031460	PAC:18203112	Os04g56400	Bradi5g24550	http://genomevolution.org/r/26gu	GRMZM2G098290	Identical Assignment
gln4	11	glutamine synthetase4		http://www.maizegdb.org/cgi-bin/displaylocusrecord.cgi?id=61724	X65928	chr5	-1	GRMZM5G872068	1	Good	http://genomevolution.org/r/260s		GRMZM2G036464	Sb04g028690	PAC:18171543	Os02g50240	Bradi3g59970	http://genomevolution.org/r/260t	No Gene Identified by Maizesequence.org	NA
gpc2	11	glyceraldehyde-3-phosphate dehydrogenase2		http://www.maizegdb.org/cgi-bin/displaylocusrecord.cgi?id=12274	U45858	chr6	-1	GRMZM2G180625	1	Good	http://genomevolution.org/r/25vr		GRMZM2G046804	Sb07g002220	PAC:18185953	Os08g03290	Bradi3g14120	http://genomevolution.org/r/26id	No Gene Identified by Maizesequence.org	NA
hmg1	11	high mobility group protein1		http://www.maizegdb.org/cgi-bin/displaylocusrecord.cgi?id=69146	X66077	chr5	-1	GRMZM5G834758	1	Good	http://genomevolution.org/r/2602		GRMZM2G150348	Sb10g030910	PAC:18197613	Os06g51220	Bradi1g29730	http://genomevolution.org/r/2603	No Gene Identified by Maizesequence.org	NA
phyA1	11	phytochromeA1		http://www.maizegdb.org/cgi-bin/displaylocusrecord.cgi?id=41144	AY234826	chr1	-1	GRMZM2G157727	1	Good	http://genomevolution.org/r/25tj	GRMZM5G895731	GRMZM2G181028	Sb01g009920	PAC:18192183	Os03g51030	Bradi1g10510	http://genomevolution.org/r/25tk	No Gene Identified by Maizesequence.org	NA
prp2	11	pathogenesis-related protein2		http://www.maizegdb.org/cgi-bin/displaylocusrecord.cgi?id=57239	T18697	chr2	-1	GRMZM2G102356	1	Good	http://genomevolution.org/r/25ny	GRMZM5G809105	chr10:123639807-123863085	Sb06g019320	PAC:18204567	Os04g39150	Bradi5g12740	http://genomevolution.org/r/268a	No Gene Identified by Maizesequence.org	NA
si1	11	silky1	Y	http://www.maizegdb.org/cgi-bin/displaylocusrecord.cgi?id=61653	AF181479	chr6	1	GRMZM2G139073	2	Good	http://genomevolution.org/r/25rh		chr5:60084734-60299771	Sb10g029810	PAC:18198773	Os06g49840	Bradi1g35000	http://genomevolution.org/r/26hl	GRMZM2G139073	Identical Assignment
tdy1	11	tie-dyed1	Y	http://www.maizegdb.org/cgi-bin/displaylocusrecord.cgi?id=9017733	FJ376984	chr6	1	GRMZM2G321778	1	Good	http://genomevolution.org/r/25wf		too big a gap	Sb09g029660	PAC:18169089	Os05g50470	Bradi2g15230	http://genomevolution.org/r/25wg	No Gene Identified by Maizesequence.org	NA
zp15	11	zein protein		http://www.maizegdb.org/cgi-bin/displaylocusrecord.cgi?id=40417	M12147	chr6	-1	GRMZM2G086294	1	Good	http://genomevolution.org/r/25lm		chr8:135041218-135189577	Sb09g000360	PAC:18169211	chr5:0-218039	chr2:39879964-40060324	http://genomevolution.org/r/26gi	No Gene Identified by Maizesequence.org	NA
cko1	10	cytokinin oxidase1		http://www.maizegdb.org/cgi-bin/displaylocusrecord.cgi?id=194080	Y18377	chr3		GRMZM2G146644	1	wrong exons in middle of transcript-real ones missing	http://genomevolution.org/r/25s5		GRMZM2G350818	Sb03g003300	PAC:18179912	Os01g09246	Bradi2g05210	http://genomevolution.org/r/26hp	No Gene Identified by Maizesequence.org	NA
crp1	10	chloroplast RNA processing1		http://www.maizegdb.org/cgi-bin/displaylocusrecord.cgi?id=25995	AF073522	chr7	-1	GRMZM2G083950	1	Good	http://genomevolution.org/r/25l6		chr2:204289880-204392064	Sb02g035800	PAC:18184391	Os07g36390	chr1:20107149-20625472	http://genomevolution.org/r/26gg	GRMZM2G083950	Identical Assignment
glu2	10	beta-glucosidase2		http://www.maizegdb.org/cgi-bin/displaylocusrecord.cgi?id=61768	U44087	chr10	1	GRMZM2G008247	1	Good	http://genomevolution.org/r/25di		no synteny	no synteny	no synteny	chr12:7256295-7525701	chr4:44193745-44372611	http://genomevolution.org/r/263a	GRMZM2G008247	Identical Assignment
got2	10	glutamate-oxaloacetate transaminase2		http://www.maizegdb.org/cgi-bin/displaylocusrecord.cgi?id=12270	AY105250	chr5	1	GRMZM5G836910	1	Good	http://genomevolution.org/r/2608		chr4:173578535-173764524	Sb04g036060	PAC:18170736	Os02g55420	Bradi3g54200	http://genomevolution.org/r/26j4	No Gene Identified by Maizesequence.org	NA
knox3	10	knotted related homeobox3		http://www.maizegdb.org/cgi-bin/displaylocusrecord.cgi?id=66089	DQ056238	chr1	-1	GRMZM2G000743	1	Can't proof	http://genomevolution.org/r/25cu		chr5:9139999-9295991	Sb01g009480	PAC:18190991	Os03g51710	Bradi1g10050	http://genomevolution.org/r/262y	No Gene Identified by Maizesequence.org	NA
lg4	10	liguleless4	Y	http://www.maizegdb.org/cgi-bin/displaylocusrecord.cgi?id=12389	AF457118	chr8	1	GRMZM2G094241	2	Good	http://genomevolution.org/r/25my		GRMZM5G832409	Sb09g002520	PAC:18167868	Os05g03884	Bradi2g38390	http://genomevolution.org/r/25mz	GRMZM2G094241	Identical Assignment
me3	10	NADP malic enzyme3		http://www.maizegdb.org/cgi-bin/displaylocusrecord.cgi?id=30034	J05130	chr3	1	GRMZM2G085019	1	Good	http://genomevolution.org/r/25lc		GRMZM5G886257	Sb03g003220	PAC:18175652	Os01g09320	Bradi2g05620	http://genomevolution.org/r/25ld	GRMZM2G085019	Identical Assignment
rrb1	10	related to retinoblastoma1		http://www.maizegdb.org/cgi-bin/displaylocusrecord.cgi?id=82119	AF007793	chr2	-1	GRMZM2G003043	2	Good	http://genomevolution.org/r/25d0		GRMZM2G153150	Sb05g020280	PAC:18200421	Os11g32900	Bradi4g17210	http://genomevolution.org/r/26f2	No Gene Identified by Maizesequence.org	NA
zag2	10	Zea AGAMOUS homolog2		http://www.maizegdb.org/cgi-bin/displaylocusrecord.cgi?id=51351	L18925	chr3	-1	GRMZM2G160687	2	Good	http://genomevolution.org/r/25tt		GRMZM2G010669	Sb08g006460	PAC:18188404	Os12g10540	Bradi4g40350	http://genomevolution.org/r/25tu	GRMZM2G160687	Identical Assignment
zap1	10	zea apetala homolog1		http://www.maizegdb.org/cgi-bin/displaylocusrecord.cgi?id=41316		chr2	1	GRMZM2G148693	2	Assignment corrected by maizesequence.org			GRMZM2G072582						GRMZM2G148693	Different Assignment	http://genomevolution.org/r/26k9	Our record was supported by two ESTs	maizesequence.orgs was supported by two other GenBank records. Their gene agrees with the genetic location of zap1	so I've switched our record
abph1	9	aberrant phyllotaxy1		http://www.maizegdb.org/cgi-bin/displaylocusrecord.cgi?id=111820	AB042260	chr2	-1	GRMZM2G035688	1	Good	http://genomevolution.org/r/25gs		chr10:131748094-131940204	Sb06g022960	PAC:18203774	Os04g44280	Bradi5g16130	http://genomevolution.org/r/26fn	No Gene Identified by Maizesequence.org	NA
amya3	9	alpha amylase3		http://www.maizegdb.org/cgi-bin/displaylocusrecord.cgi?id=61401	L25805	chr2	1	GRMZM2G138468	2	Good	http://genomevolution.org/r/25rc	GRMZM2G566151	GRMZM2G070172	Sb02g026610	PAC:18182014	Os09g28400	Bradi4g32140	http://genomevolution.org/r/25rd	No Gene Identified by Maizesequence.org	NA
bap2	9	basal layer antifungal protein2		http://www.maizegdb.org/cgi-bin/displaylocusrecord.cgi?id=105964	AJ133529	chr4	1	GRMZM2G152655	2	Good	http://genomevolution.org/r/25sj	GRMZM2G027472	GRMZM2G008403	Sb07g003420	too big a gap	too big a gap	too big a gap	http://genomevolution.org/r/26hr	No Gene Identified by Maizesequence.org	NA
bd1	9	branched silkless1	Y	http://www.maizegdb.org/cgi-bin/displaylocusrecord.cgi?id=12070	AY196003	chr7	-1	GRMZM2G307119	1	Good	http://genomevolution.org/r/25vz		GRMZM2G458437	Sb02g042400	PAC:18182907	Os07g47330	Bradi1g18580	http://genomevolution.org/r/25w0	GRMZM2G307119	Identical Assignment
bif2	9	barren inflorescence2	Y	http://www.maizegdb.org/cgi-bin/displaylocusrecord.cgi?id=60438	EF532402	chr1	1	GRMZM2G171822	1	deletion within first exon	http://genomevolution.org/r/25uz		too big a gap	Sb08g021520	PAC:18189421	Os12g42050	Bradi4g01680	http://genomevolution.org/r/25v0	No Gene Identified by Maizesequence.org	NA
bsd2	9	bundle sheath defective2	Y	http://www.maizegdb.org/cgi-bin/displaylocusrecord.cgi?id=112957	AF126742	chr1	1	GRMZM2G062788	1	Good	http://genomevolution.org/r/25j4		no synteny	chr8:49843172-50129204	chr8:17214801-17370828	chr12:23768068-24054915	chr4:2828991-3040444	http://genomevolution.org/r/2660	No Gene Identified by Maizesequence.org	NA
fer1	9	ferritin1		http://www.maizegdb.org/cgi-bin/displaylocusrecord.cgi?id=25281	X61391	chr4	-1	GRMZM2G325575	1	Good	http://genomevolution.org/r/25wh		GRMZM2G325479	Sb05g000530	PAC:18200503	Os11g01530	no synteny	http://genomevolution.org/r/25wi	GRMZM2G325575	Identical Assignment
glb2	9	globulin2		http://www.maizegdb.org/cgi-bin/displaylocusrecord.cgi?id=12266	X53715	chr1	-1	GRMZM2G026703	1	Good	http://genomevolution.org/r/25g4		chr5:4380408-4520862	Sb01g005440	PAC:18190926	Os03g57960	Bradi1g05910	http://genomevolution.org/r/26fk	No Gene Identified by Maizesequence.org	NA
gln2	9	glutamine synthetase2		http://www.maizegdb.org/cgi-bin/displaylocusrecord.cgi?id=40408	X65927	chr1	-1	GRMZM2G024104	1	Good	http://genomevolution.org/r/25fm		chr5:10749047-10908704	Sb01g010270	PAC:18193601	Os03g50490	Bradi1g11450	http://genomevolution.org/r/26fi	No Gene Identified by Maizesequence.org	NA
gln5	9	glutamine synthetase5		http://www.maizegdb.org/cgi-bin/displaylocusrecord.cgi?id=61726	X65929	chr4	-1	GRMZM2G036464	2	Good	http://genomevolution.org/r/25gy		GRMZM5G872068	Sb04g028690	PAC:18171543	Os02g50240	Bradi3g59970	http://genomevolution.org/r/25gz	No Gene Identified by Maizesequence.org	NA
gln6	9	glutamine synthetase6		http://www.maizegdb.org/cgi-bin/displaylocusrecord.cgi?id=116219	X65926	chr1	-1	GRMZM2G050514	1	Good	http://genomevolution.org/r/25hw		GRMZM5G887009	Sb01g042450	PAC:18195278	Os03g12290	Bradi1g69530	http://genomevolution.org/r/25hx	No Gene Identified by Maizesequence.org	NA
hsp18c	9	heat shock protein18c		http://www.maizegdb.org/cgi-bin/displaylocusrecord.cgi?id=66500	X54075	chr8	1	GRMZM2G034157	2	Upstream UTR missing	http://genomevolution.org/r/25gm		too big a gap	too big a gap	too big a gap	too big a gap	Bradi2g05380	http://genomevolution.org/r/264s	No Gene Identified by Maizesequence.org	NA
im30p1	9	IM30 protein homolog1		http://www.maizegdb.org/cgi-bin/displaylocusrecord.cgi?id=40659	T12745	chr3	-1	GRMZM2G017077	1	Can't proof	http://genomevolution.org/r/25ew		GRMZM2G024607	Sb03g042550	PAC:18175954	Os01g67000	Bradi2g56880	http://genomevolution.org/r/26fd	No Gene Identified by Maizesequence.org	NA
ivr1	9	invertase1		http://www.maizegdb.org/cgi-bin/displaylocusrecord.cgi?id=86038	U16123	chr2	-1	GRMZM2G394450	1	Good	http://genomevolution.org/r/25xz		chr10:132925396-133160604	Sb06g023760	PAC:18205389	Os04g45290	Bradi5g16900	http://genomevolution.org/r/26io	No Gene Identified by Maizesequence.org	NA
ole3	9	oleosin3		http://www.maizegdb.org/cgi-bin/displaylocusrecord.cgi?id=65605	J05212	chr5	-1	AC206941.2_FG002	2	3' UTR split into separate gene model	http://genomevolution.org/r/25c0		GRMZM2G480951	Sb01g011120	chr1:8025081-8911585	Os03g49190	Bradi1g11750	http://genomevolution.org/r/262m	No Gene Identified by Maizesequence.org	NA
rab15	9	responsive to abscisic acid15		http://www.maizegdb.org/cgi-bin/displaylocusrecord.cgi?id=69263	X12564	chr5	-1	GRMZM2G165901	2	Good	http://genomevolution.org/r/25ub	GRMZM2G166026	chr1:257760112-258744975	Sb01g012300	chr1:9250183-9757772	Os03g46770	Bradi1g12790	http://genomevolution.org/r/26i4	No Gene Identified by Maizesequence.org	NA
rgd1	9	ragged seedling1	Y	http://www.maizegdb.org/cgi-bin/displaylocusrecord.cgi?id=12602	DQ832257	chr6	1	GRMZM2G020187		Good	http://genomevolution.org/r/25fg		no synteny	no synteny	no synteny	no synteny	no synteny	http://genomevolution.org/r/25fh	No Gene Identified by Maizesequence.org	NA
rs2	9	rough sheath2	Y	http://www.maizegdb.org/cgi-bin/displaylocusrecord.cgi?id=12617	AF143447	chr1	-1	GRMZM2G403620	1	Good	http://genomevolution.org/r/25y9		chr3:125695993-125944270	Sb08g018840	too big a gap	Os12g38400	Bradi4g03970	http://genomevolution.org/r/26ir	GRMZM2G403620	Identical Assignment
ssu2	9	ribulose bisphosphate carboxylase small subunit2		http://www.maizegdb.org/cgi-bin/displaylocusrecord.cgi?id=12661	Y09214	chr2	1	GRMZM2G113033	2	Good	http://genomevolution.org/r/25p2		GRMZM2G098520	Sb05g003480	no synteny	no synteny	no synteny	http://genomevolution.org/r/25p3	No Gene Identified by Maizesequence.org	NA
tub1	9	beta tubulin1		http://www.maizegdb.org/cgi-bin/displaylocusrecord.cgi?id=24942	X52878	chr1	1	GRMZM2G164696	1	Good	http://genomevolution.org/r/25u5		chr9:155132417-155330142	Sb01g050310	chr1:54908633-55495596	Os03g01530	Bradi1g78210	http://genomevolution.org/r/26i2	No Gene Identified by Maizesequence.org	NA
ba1	8	barren stalk1	Y	http://www.maizegdb.org/cgi-bin/displaylocusrecord.cgi?id=12066	AY753892	chr3	1	GRMZM2G397518	1	Good	http://genomevolution.org/r/25y1		chr8:169643060-169829550	Sb03g038820	PAC:18178496	Os01g61480	Bradi2g54030	http://genomevolution.org/r/26ip	No Gene Identified by Maizesequence.org	NA
bde1	8	bearded-ear1	Y	http://www.maizegdb.org/cgi-bin/displaylocusrecord.cgi?id=41343	L46397	chr5	1	GRMZM2G160565	1	Good	http://genomevolution.org/r/25tr		GRMZM2G003514	Sb04g031750	PAC:18173988	Os02g45770	Bradi3g51800	http://genomevolution.org/r/26hy	No Gene Identified by Maizesequence.org	NA
dof2	8	DNA binding with one finger2		http://www.maizegdb.org/cgi-bin/displaylocusrecord.cgi?id=56915	X79934	chr2	-1	GRMZM2G009406	2	Good	http://genomevolution.org/r/25dm		GRMZM2G089850	Sb02g027480	PAC:18180704	Os09g29960	Bradi4g33000	http://genomevolution.org/r/25dn	No Gene Identified by Maizesequence.org	NA
hm2	8	Helminthosporium carbonum susceptibility2		http://www.maizegdb.org/cgi-bin/displaylocusrecord.cgi?id=12328	AF041047	chr9	1	GRMZM2G086773	1	Good	http://genomevolution.org/r/25lo		chr6:95592074-95763223	Sb10g025770	PAC:18197365	Os06g44180	no synteny	http://genomevolution.org/r/25lp	No Gene Identified by Maizesequence.org	NA
incw1	8	cell wall invertase1		http://www.maizegdb.org/cgi-bin/displaylocusrecord.cgi?id=113958	U17695	chr5	1	GRMZM2G139300	1	Good	http://genomevolution.org/r/25rj		chr4:108029805-108599329	Sb04g021810	PAC:18170654	Os02g33110	Bradi3g44990	http://genomevolution.org/r/25rk	No Gene Identified by Maizesequence.org	NA
mop1	8	mediator of paramutation1	Y	http://www.maizegdb.org/cgi-bin/displaylocusrecord.cgi?id=133880	DQ417755	chr2	-1	GRMZM2G042443	1	Can't proof	http://genomevolution.org/r/25hi	GRMZM2G042532	chr10:123639807-123863085	Sb06g019330	PAC:18204806	Os04g39160	Bradi5g12760	http://genomevolution.org/r/26fr	GRMZM2G042443	Identical Assignment
plt1	8	phospholipid transfer protein homolog1		http://www.maizegdb.org/cgi-bin/displaylocusrecord.cgi?id=65601	J04176	chr10	-1	GRMZM2G101958	1	Good	http://genomevolution.org/r/25nu		GRMZM2G010868	Sb08g002670	PAC:18201750	no synteny	too big a gap	http://genomevolution.org/r/2688	GRMZM2G101958	Identical Assignment
prh1	8	ser/thr protein phosphatase1		http://www.maizegdb.org/cgi-bin/displaylocusrecord.cgi?id=30112	M60215	chr4	1	GRMZM2G112240	2	Good	http://genomevolution.org/r/25oy		GRMZM2G390076	Sb04g037500	PAC:18172172	Os02g57450	Bradi3g55620	http://genomevolution.org/r/25oz	GRMZM2G112240	Identical Assignment
prp1	8	pathogenesis-related protein1		http://www.maizegdb.org/cgi-bin/displaylocusrecord.cgi?id=30225	X54325	chr8	-1	AC205274.3_FG001		UTRs unannotated	http://genomevolution.org/r/25bw		too big a gap	no synteny	no synteny	no synteny	no synteny	http://genomevolution.org/r/25bx	No Gene Identified by Maizesequence.org	NA
sxd1	8	sucrose export defective1		http://www.maizegdb.org/cgi-bin/displaylocusrecord.cgi?id=60529	AF302187	chr5	1	GRMZM2G009785	1	Good	http://genomevolution.org/r/25dq		too big a gap	Sb04g010660	PAC:18171241	Os02g17650	Bradi3g10250	http://genomevolution.org/r/25dr	GRMZM2G009785	Identical Assignment
tbp2	8	TATA-binding protein2		http://www.maizegdb.org/cgi-bin/displaylocusrecord.cgi?id=40430	L13302	chr5	-1	GRMZM2G161418	2	Good	http://genomevolution.org/r/25tx		GRMZM2G149238	Sb01g012880	PAC:18191074	Os03g45410	Bradi1g13220	http://genomevolution.org/r/25ty	No Gene Identified by Maizesequence.org	NA
tua4	8	alpha tubulin4		http://www.maizegdb.org/cgi-bin/displaylocusrecord.cgi?id=25555	X73980	chr5	-1	GRMZM2G152466	2	Good	http://genomevolution.org/r/25sh		GRMZM2G153292	Sb01g009560	PAC:18190271	Os03g51600	Bradi1g10150	http://genomevolution.org/r/25si	No Gene Identified by Maizesequence.org	NA
vp10	8	viviparous10	Y	http://www.maizegdb.org/cgi-bin/displaylocusrecord.cgi?id=30023	DQ231522	chr10	1	GRMZM2G067176	2	Good	http://genomevolution.org/r/25je		GRMZM2G324669	Sb06g031680	PAC:18202644	Os04g56620	Bradi5g24930	http://genomevolution.org/r/25jf	No Gene Identified by Maizesequence.org	NA
zmm31	8	Zea mays MADS31		http://www.maizegdb.org/cgi-bin/displaylocusrecord.cgi?id=59807	AJ430640	chr5	1	GRMZM2G071620	2	Good	http://genomevolution.org/r/25jq	GRMZM2G553379	GRMZM2G087095	Sb01g007790	PAC:18191766	Os03g54160	Bradi1g08340	http://genomevolution.org/r/266a	No Gene Identified by Maizesequence.org	NA
bip1	7	Binding protein homolog1		http://www.maizegdb.org/cgi-bin/displaylocusrecord.cgi?id=66082	U58208	chr5	-1	GRMZM2G114793	1	Good	http://genomevolution.org/r/25pa		GRMZM2G415007	Sb04g001140	PAC:18173984	Os02g02410	Bradi3g01480	http://genomevolution.org/r/25pb	No Gene Identified by Maizesequence.org	NA
bx5	7	benzoxazinone synthesis5		http://www.maizegdb.org/cgi-bin/displaylocusrecord.cgi?id=40806	X81830	chr4	1	GRMZM2G063756	1	Good	http://genomevolution.org/r/25j6	GRMZM2G167549||GRMZM2G172491||GRMZM2G473480||GRMZM5G855537||GRMZM5G899181	no synteny	Sb05g026080	chr5:36758330-37504728	chr11:25708564-25959495	chr4:10814041-11469570	http://genomevolution.org/r/2661	No Gene Identified by Maizesequence.org	NA
d9	7	dwarf plant9	Y	http://www.maizegdb.org/cgi-bin/displaylocusrecord.cgi?id=12144	DQ903073	chr5	-1	GRMZM2G024973	2	Good	http://genomevolution.org/r/25fo		GRMZM2G144744	Sb01g010660	PAC:18190750	Os03g49990	Bradi1g11090	http://genomevolution.org/r/25fp	No Gene Identified by Maizesequence.org	NA
dsc1	7	discolored kernel1	Y	http://www.maizegdb.org/cgi-bin/displaylocusrecord.cgi?id=25058	AF006498	chr4		chr4:47715993		Not gene model	http://genomevolution.org/r/25cs							http://genomevolution.org/r/25ct	No Gene Identified by Maizesequence.org	NA
dzs18	7	delta zein structural18		http://www.maizegdb.org/cgi-bin/displaylocusrecord.cgi?id=66567	U31541	chr6	1	GRMZM2G100018	2	Good	http://genomevolution.org/r/25nm		chr9:45799986-46116362	Sb10g013050	PAC:18198383	no synteny	too big a gap	http://genomevolution.org/r/26gx	No Gene Identified by Maizesequence.org	NA
gdh1	7	glutamic dehydrogenase1		http://www.maizegdb.org/cgi-bin/displaylocusrecord.cgi?id=12238	AY106054	chr1	-1	GRMZM2G178415	1	Good	http://genomevolution.org/r/25vj		GRMZM2G130542	Sb01g005370	PAC:18193575	Os03g58040	Bradi1g05680	http://genomevolution.org/r/26ib	GRMZM2G178415	Identical Assignment
gln3	7	glutamine synthetase3		http://www.maizegdb.org/cgi-bin/displaylocusrecord.cgi?id=61717	X65930	chr9	1	GRMZM2G046601	2	Good	http://genomevolution.org/r/25ho	GRMZM5G887009	GRMZM2G050514	Sb01g042450	PAC:18195278	Os03g12290	Bradi1g69530	http://genomevolution.org/r/265a	No Gene Identified by Maizesequence.org	NA
grf1	7	general regulatory factor1		http://www.maizegdb.org/cgi-bin/displaylocusrecord.cgi?id=25987	AY110485	chr2	-1	GRMZM2G102499	1	Good	http://genomevolution.org/r/25o0		GRMZM5G872368	Sb06g019100	PAC:18204934	Os04g38870	Bradi5g12510	http://genomevolution.org/r/25o1	GRMZM2G034876	Different Assignment	http://genomevolution.org/r/26jt	Two independent GenBank records match the gene we identified as grf1 and not the gene identified by maizesequence.org. Our gene is on the correct chromosome according the maizegdb	the maizesequence.org gene is not.
in1	7	intensifier1	Y	http://www.maizegdb.org/cgi-bin/displaylocusrecord.cgi?id=12343	U57899	chr7	1	GRMZM2G042733	1	Good	http://genomevolution.org/r/25hk		chr2:160677513-160835765	Sb02g006390	PAC:18184572	Os07g11020	Bradi1g54070	http://genomevolution.org/r/26fs	No Gene Identified by Maizesequence.org	NA
lhcb3	7	light harvesting chlorophyll a/b binding protein3		http://www.maizegdb.org/cgi-bin/displaylocusrecord.cgi?id=12106	X55892	chr8	-1	GRMZM2G155216	2	Good	http://genomevolution.org/r/25t1		GRMZM2G402936	Sb09g028720	PAC:18169383	chr5:28058352-28684191	Bradi2g16290	http://genomevolution.org/r/26ht	No Gene Identified by Maizesequence.org	NA
ms45	7	male sterile45	Y	http://www.maizegdb.org/cgi-bin/displaylocusrecord.cgi?id=104485	AF360356	chr9		GRMZM2G307906	2	CDS wrong	http://genomevolution.org/r/25w1		GRMZM2G100620	Sb01g040250	PAC:18194605	Os03g15700	Bradi1g67320	http://genomevolution.org/r/25w2	No Gene Identified by Maizesequence.org	NA
ole1	7	oleosin1		http://www.maizegdb.org/cgi-bin/displaylocusrecord.cgi?id=65609	U13701	chr2	1	GRMZM2G337229	1	Good	http://genomevolution.org/r/25wr		too big a gap	Sb06g024350	PAC:18205041	Os04g46200	Bradi5g17470	http://genomevolution.org/r/25ws	No Gene Identified by Maizesequence.org	NA
psei1	7	cystatin1		http://www.maizegdb.org/cgi-bin/displaylocusrecord.cgi?id=30122	AM055630	chr3	-1	GRMZM2G438551	1	Good	http://genomevolution.org/r/25yv	GRMZM5G858738	GRMZM2G012160	Sb03g037370	PAC:18175081	Os01g58890	Bradi2g52670	http://genomevolution.org/r/26dn	No Gene Identified by Maizesequence.org	NA
rtcs1	7	rootless concerning crown and seminal roots1	Y	http://www.maizegdb.org/cgi-bin/displaylocusrecord.cgi?id=114025	EF051732	chr1	-1	GRMZM2G092542	1	Good	http://genomevolution.org/r/25mu	GRMZM2G092483	GRMZM2G092483	Sb01g046990	PAC:18195454	Os03g05510	Bradi1g75110	http://genomevolution.org/r/25mv	No Gene Identified by Maizesequence.org	NA
rth1	7	roothair defective1	Y	http://www.maizegdb.org/cgi-bin/displaylocusrecord.cgi?id=60513	AY265854	chr1	1	GRMZM2G099056	1	Good	http://genomevolution.org/r/25ni		chr5:17177936-18066810	Sb01g014290	PAC:18195388	Os03g42750	Bradi1g14450	http://genomevolution.org/r/25nj	No Gene Identified by Maizesequence.org	NA
sod9	7	superoxide dismutase9		http://www.maizegdb.org/cgi-bin/displaylocusrecord.cgi?id=56998	X17564	chr9	-1	GRMZM2G058522	2	Good	http://genomevolution.org/r/25iq		GRMZM2G169890	Sb01g035350	PAC:18195462	Os03g22810	chr1:61573209-62431857	http://genomevolution.org/r/26g1	No Gene Identified by Maizesequence.org	NA
tha1	7	thylakoid assembly1		http://www.maizegdb.org/cgi-bin/displaylocusrecord.cgi?id=26005	U71123	chr3		chr3:58008644		No gene model	http://genomevolution.org/r/25cq							http://genomevolution.org/r/25cr	No Gene Identified by Maizesequence.org	NA
tlk1	7	tousled-like protein kinase1		http://www.maizegdb.org/cgi-bin/displaylocusrecord.cgi?id=64598	AY644701	chr1	-1	GRMZM2G016671	1	Good	http://genomevolution.org/r/25es		GRMZM2G172132	Sb01g008020	PAC:18191278	Os03g53880	Bradi1g08540	http://genomevolution.org/r/25et	No Gene Identified by Maizesequence.org	NA
tub2	7	beta tubulin2		http://www.maizegdb.org/cgi-bin/displaylocusrecord.cgi?id=24944	X52879	chr8	-1	GRMZM2G334899	2	Good	http://genomevolution.org/r/25wn		chr6:146975550-147183781	Sb09g020360	PAC:18170502	Os05g34170	Bradi2g25370	http://genomevolution.org/r/26ig	No Gene Identified by Maizesequence.org	NA
tub4	7	beta tubulin4		http://www.maizegdb.org/cgi-bin/displaylocusrecord.cgi?id=56925	X74655	chr5	-1	GRMZM2G066191	2	Good	http://genomevolution.org/r/25jc		GRMZM2G108766	Sb01g012740	PAC:18191607	Os03g45920	Bradi1g13090	http://genomevolution.org/r/25jd	No Gene Identified by Maizesequence.org	NA
arpp2a	6	acidic ribosomal protein P2a		http://www.maizegdb.org/cgi-bin/displaylocusrecord.cgi?id=82408	X86553	chr8	1	GRMZM2G119809	2	Good	http://genomevolution.org/r/25q0	GRMZM2G102891||GRMZM2G105712	too big a gap	Sb09g029390	chr9:28549175-29341996	chr5:28584191-29087363	chr2:13738715-13934375	http://genomevolution.org/r/269b	No Gene Identified by Maizesequence.org	NA
bx2	6	benzoxazinone synthesis2		http://www.maizegdb.org/cgi-bin/displaylocusrecord.cgi?id=40807	X81831	chr4	1	GRMZM2G085661	1	Good	http://genomevolution.org/r/25li		chr2:229933265-230991271	Sb05g026080	chr5:36473532-37504728	Os11g41710	chr4:10814041-11688511	http://genomevolution.org/r/2674	No Gene Identified by Maizesequence.org	NA
bx3	6	benzoxazinone synthesis3		http://www.maizegdb.org/cgi-bin/displaylocusrecord.cgi?id=40805	X81829	chr4	-1	GRMZM2G167549	1	Good	http://genomevolution.org/r/25uf	GRMZM2G172491||GRMZM2G473480||GRMZM5G855537||GRMZM5G899181	chr2:229933265-230991271	Sb05g026065	chr5:36758330-37504728	chr11:25708564-25959495	chr4:10814041-11469570	http://genomevolution.org/r/26bh	No Gene Identified by Maizesequence.org	NA
elfa1	6	elongation factor alpha1		http://www.maizegdb.org/cgi-bin/displaylocusrecord.cgi?id=62148	M95072	chr6	-1	AC233866.1_FG006	1	Can't proof	http://genomevolution.org/r/25ca	GRMZM5G859846||GRMZM5G896006	no synteny	too big a gap	too big a gap	chr5:16888752-17955366	chr2:26261030-27198490	http://genomevolution.org/r/262r	No Gene Identified by Maizesequence.org	NA
fgs1	6	ferredoxin-dependent glutamate synthase1		http://www.maizegdb.org/cgi-bin/displaylocusrecord.cgi?id=65574	M59190	chr7	-1	GRMZM2G036609	1	Good	http://genomevolution.org/r/25h2		chr2:214961586-215069376	Sb02g041740	PAC:18181877	Os07g46460	Bradi1g19080	http://genomevolution.org/r/26fo	GRMZM2G036609	Identical Assignment
fie2	6	fertilization independent endosperm2		http://www.maizegdb.org/cgi-bin/displaylocusrecord.cgi?id=754920	AY061965	chr10	-1	GRMZM2G148924	1	Good	http://genomevolution.org/r/25s9		GRMZM2G118205	Sb07g002820	PAC:18187686	Os08g04290	Bradi3g14510	http://genomevolution.org/r/25sa	GRMZM2G148924	Identical Assignment
grp1	6	glycine-rich protein1		http://www.maizegdb.org/cgi-bin/displaylocusrecord.cgi?id=25827	X61121	chr1	-1	GRMZM2G080603	1	Good	http://genomevolution.org/r/25km	GRMZM5G836166	no synteny	too big a gap	no synteny	no synteny	no synteny	http://genomevolution.org/r/25kn	No Gene Identified by Maizesequence.org	NA
hyp1	6	hybrid proline-rich protein1		http://www.maizegdb.org/cgi-bin/displaylocusrecord.cgi?id=25970	X60432	chr9	1	GRMZM2G304378	1	Good	http://genomevolution.org/r/25vv	GRMZM2G304385	too big a gap	Sb10g004790	chr10:4284199-4850277	Os06g07220	Bradi1g48160	http://genomevolution.org/r/26ie	GRMZM2G304378	Identical Assignment
lhcb2	6	light harvesting chlorophyll a/b binding protein2		http://www.maizegdb.org/cgi-bin/displaylocusrecord.cgi?id=25702	X14794	chr7	-1	AC207722.2_FG009	1	Good	http://genomevolution.org/r/25c2	GRMZM2G353753	chr2:197477178-197648432	Sb02g032040	PAC:18183417	no synteny	Bradi4g37210	http://genomevolution.org/r/26ey	No Gene Identified by Maizesequence.org	NA
lox3	6	lipoxygenase3		http://www.maizegdb.org/cgi-bin/displaylocusrecord.cgi?id=1160713	AF465643	chr1	1	GRMZM2G109130	1	Good	http://genomevolution.org/r/25oi		GRMZM2G102760	Sb01g011040	PAC:18195057	Os03g49260	Bradi1g11680	http://genomevolution.org/r/268k	No Gene Identified by Maizesequence.org	NA
mha2	6	plasma-membrane H+ATPase2		http://www.maizegdb.org/cgi-bin/displaylocusrecord.cgi?id=104276	X85805	chr2	-1	GRMZM2G019404	1	Good	http://genomevolution.org/r/25fe	GRMZM2G314079	GRMZM2G314079	Sb06g031240	PAC:18204901	Os04g56160	Bradi5g24690	http://genomevolution.org/r/25ff	GRMZM2G019404	Identical Assignment
mlg3	6	lea protein group3		http://www.maizegdb.org/cgi-bin/displaylocusrecord.cgi?id=78911	U05226	chr6	1	GRMZM2G096475	1	Good	http://genomevolution.org/r/25n2		chr8:62956186-63192617	Sb09g027110	PAC:18168121	Os05g46480	Bradi2g18100	http://genomevolution.org/r/25n3	No Gene Identified by Maizesequence.org	NA
mrp1	6	Myb related protein1		http://www.maizegdb.org/cgi-bin/displaylocusrecord.cgi?id=175392	AJ318518	chr8	-1	GRMZM2G111306	2	Good	http://genomevolution.org/r/25oq		GRMZM2G030403	too big a gap	no synteny	chr5:1836622-2596437	too big a gap	http://genomevolution.org/r/26h5	No Gene Identified by Maizesequence.org	NA
nac1	6	NaCl stress protein1		http://www.maizegdb.org/cgi-bin/displaylocusrecord.cgi?id=64622	T14760	chr10	-1	GRMZM2G015605	1	Good	http://genomevolution.org/r/25em		chr8:129242079-129392484	Sb09g003060	PAC:18169177	Os05g04700	Bradi2g36770	http://genomevolution.org/r/26fb	No Gene Identified by Maizesequence.org	NA
sal1	6	supernumerary aleurone1	Y	http://www.maizegdb.org/cgi-bin/displaylocusrecord.cgi?id=886495	AY243475	chr9	-1	GRMZM2G117935	1	Good	http://genomevolution.org/r/25pq		GRMZM2G701024	Sb10g025200	PAC:18196712	Os06g43590	too big a gap	http://genomevolution.org/r/26ha	GRMZM2G117935	Identical Assignment
stc1	6	sesquiterpene cyclase1		http://www.maizegdb.org/cgi-bin/displaylocusrecord.cgi?id=484833	AF296122	chr9	1	GRMZM2G177098	1	Good	http://genomevolution.org/r/25vf	GRMZM2G177211	GRMZM2G030583	Sb10g006160	PAC:18198687	chr6:4114082-4703565	Bradi1g46840	http://genomevolution.org/r/26i9	No Gene Identified by Maizesequence.org	NA
tua5	6	alpha tubulin5		http://www.maizegdb.org/cgi-bin/displaylocusrecord.cgi?id=25557	X63177	chr2	1	GRMZM2G099167	2	Good	http://genomevolution.org/r/25nk	GRMZM2G333258	GRMZM2G333258	Sb02g037260	PAC:18181282	Os07g38730	Bradi1g23770	http://genomevolution.org/r/26gw	GRMZM2G099167	Identical Assignment
tua6	6	alpha tubulin6		http://www.maizegdb.org/cgi-bin/displaylocusrecord.cgi?id=25559	X63178	chr7	1	GRMZM2G083243	1	Good	http://genomevolution.org/r/25ky	GRMZM2G083590	GRMZM2G333258	Sb02g037260	PAC:18181282	Os07g38730	Bradi1g23770	http://genomevolution.org/r/26gd	GRMZM2G083243	Identical Assignment
tub6	6	beta tubulin6		http://www.maizegdb.org/cgi-bin/displaylocusrecord.cgi?id=9018109	L10633	chr3	-1	GRMZM2G071790	1	Good	http://genomevolution.org/r/25ju	GRMZM5G857152	GRMZM2G172932	Sb03g037490	PAC:18176615	Os01g59150	Bradi2g52790	http://genomevolution.org/r/25jv	No Gene Identified by Maizesequence.org	NA
zfl2	6	Zea floricaula leafy2		http://www.maizegdb.org/cgi-bin/displaylocusrecord.cgi?id=41310	AY179881	chr2	-1	GRMZM2G180190	1	Good	http://genomevolution.org/r/25vp		GRMZM2G098813	Sb06g027340	PAC:18205732	Os04g51000	Bradi5g20340	http://genomevolution.org/r/25vq	No Gene Identified by Maizesequence.org	NA
akh2	5	aspartate kinase homoserine dehydrogenase2		http://www.maizegdb.org/cgi-bin/displaylocusrecord.cgi?id=66611	L33913	chr2	-1	GRMZM2G104546	2	Good	http://genomevolution.org/r/25o6		GRMZM2G136712	Sb02g019450	PAC:18180944	no synteny	Bradi4g27450	http://genomevolution.org/r/25o7	No Gene Identified by Maizesequence.org	NA
ant2	5	adenine nucleotide translocator2		http://www.maizegdb.org/cgi-bin/displaylocusrecord.cgi?id=12051	X15712	chr4	1	GRMZM2G135186	2	Good	http://genomevolution.org/r/25r2		GRMZM5G837108	Sb04g029750	PAC:18173089	Os02g48720	chr3:56201835-56506183	http://genomevolution.org/r/25r3	No Gene Identified by Maizesequence.org	NA
atp1	5	ATPase1		http://www.maizegdb.org/cgi-bin/displaylocusrecord.cgi?id=24867	M95063	chr3	1	GRMZM2G101020	2	Good	http://genomevolution.org/r/25no		GRMZM2G028432	Sb08g004390	PAC:18189481	Os12g07140	Bradi4g41560	http://genomevolution.org/r/26gy	No Gene Identified by Maizesequence.org	NA
bx4	5	benzoxazinone synthesis4		http://www.maizegdb.org/cgi-bin/displaylocusrecord.cgi?id=114044	X81827	chr4	-1	GRMZM2G172491	1	Good	http://genomevolution.org/r/25v5	GRMZM2G473480||GRMZM5G855537||GRMZM5G899181	no synteny	Sb05g026065	chr5:36758330-37504728	chr11:25708564-25959495	chr4:10814041-11469570	http://genomevolution.org/r/26bu	No Gene Identified by Maizesequence.org	NA
caf2	5	crs2 associated factor2		http://www.maizegdb.org/cgi-bin/displaylocusrecord.cgi?id=886551	AY264369	chr3	1	AC199526.5_FG003	1	Good	http://genomevolution.org/r/25bs		chr8:38441683-39174736	Sb03g013160	too big a gap	Os01g21990	Bradi2g12140	http://genomevolution.org/r/262j	No Gene Identified by Maizesequence.org	NA
ccp2	5	cysteine protease2		http://www.maizegdb.org/cgi-bin/displaylocusrecord.cgi?id=112838	X99936	chr7	1	GRMZM2G038636	1	Good	http://genomevolution.org/r/25h6		GRMZM5G820822	Sb02g025920	PAC:18181690	Os09g27030	Bradi4g31440	http://genomevolution.org/r/26fp	No Gene Identified by Maizesequence.org	NA
crs2	5	chloroplast RNA splicing2		http://www.maizegdb.org/cgi-bin/displaylocusrecord.cgi?id=106358	AF225708	chr8	1	GRMZM2G132021	2	Good	http://genomevolution.org/r/25qu		GRMZM2G060887	Sb03g007130	PAC:18178350	Os01g04130	Bradi2g02200	http://genomevolution.org/r/26hg	No Gene Identified by Maizesequence.org	NA
cyc1	5	cyclin1		http://www.maizegdb.org/cgi-bin/displaylocusrecord.cgi?id=86023	U10078	chr8	-1	GRMZM2G034647	2	Good	http://genomevolution.org/r/25go	GRMZM5G804421	chr6:155582978-155687006	Sb09g024180	PAC:18168868	Os05g41390	Bradi2g21330	http://genomevolution.org/r/26fm	GRMZM2G034647	Identical Assignment
cyc4b	5	cyclin4		http://www.maizegdb.org/cgi-bin/displaylocusrecord.cgi?id=86025	U10079	chr8	1	GRMZM2G310115	2	Good	http://genomevolution.org/r/25w3		GRMZM2G072853	Sb03g037470	PAC:18179550	Os01g59130	Bradi2g52770	http://genomevolution.org/r/25w4	No Gene Identified by Maizesequence.org	NA
fer2	5	ferritin homolog2		http://www.maizegdb.org/cgi-bin/displaylocusrecord.cgi?id=25286	X61392			GRMZM2G147266	1	CDS wrong|real gene is annotated as only 3' UTR	http://genomevolution.org/r/25s7	GRMZM2G066165||GRMZM5G854762	no synteny	too big a gap	no synteny	no synteny	Bradi4g44860	http://genomevolution.org/r/26ae	No Gene Identified by Maizesequence.org	NA
fht1	5	flavanone 3-hydroxylase1		http://www.maizegdb.org/cgi-bin/displaylocusrecord.cgi?id=77928	U04434	chr2	1	GRMZM2G062396	1	Good	http://genomevolution.org/r/25j2		chr10:146892300-147019887	Sb06g031790	PAC:18204417	Os04g56700	Bradi5g25050	http://genomevolution.org/r/26g2	No Gene Identified by Maizesequence.org	NA
fie1	5	fertilization independent endosperm1		http://www.maizegdb.org/cgi-bin/displaylocusrecord.cgi?id=754919	AY061964	chr4	-1	GRMZM2G118205	2	Good	http://genomevolution.org/r/25ps		GRMZM2G148924	Sb07g002820	PAC:18187686	Os08g04290	Bradi3g14510	http://genomevolution.org/r/25pt	No Gene Identified by Maizesequence.org	NA
fps1	5	farnesyl pyrophosphate synthase1		http://www.maizegdb.org/cgi-bin/displaylocusrecord.cgi?id=99300	AF330036	chr8	-1	GRMZM2G168681	2	Good	http://genomevolution.org/r/25un		GRMZM2G079836	Sb09g027190	PAC:18168897	Os05g46580	Bradi2g17990	http://genomevolution.org/r/25uo	No Gene Identified by Maizesequence.org	NA
gsr1	5	glutathione reductase1		http://www.maizegdb.org/cgi-bin/displaylocusrecord.cgi?id=57211	T12723	chr1	1	GRMZM2G172322	1	Good	http://genomevolution.org/r/25v3		chr9:153144213-153318012	Sb01g046260	PAC:18191253	Os03g06740	Bradi1g74180	http://genomevolution.org/r/25v4	No Gene Identified by Maizesequence.org	NA
gzr1	5	gamma zein modifier1		http://www.maizegdb.org/cgi-bin/displaylocusrecord.cgi?id=113960	S78780	chr7	1	GRMZM2G138727	1	Good|identical to 27-kDa zein protein	http://genomevolution.org/r/25rg	GRMZM2G438538	GRMZM2G060429	Sb02g025510	PAC:18180925	chr9:15882395-16462627	chr4:36700872-37221819	http://genomevolution.org/r/26hk	No Gene Identified by Maizesequence.org	NA
hsp1	5	heat shock protein1		http://www.maizegdb.org/cgi-bin/displaylocusrecord.cgi?id=25207	X03697	chr8	-1	GRMZM2G310431	2	Good	http://genomevolution.org/r/25w5		AC209784.3_FG007	Sb03g039360	PAC:18175196	Os01g62290	Bradi2g54570	http://genomevolution.org/r/25w6	No Gene Identified by Maizesequence.org	NA
les22	5	lesion22		http://www.maizegdb.org/cgi-bin/displaylocusrecord.cgi?id=223331	AF058763	chr1	1	GRMZM2G044074	1	Good	http://genomevolution.org/r/25hm		chr9:130869498-130975930	Sb01g036030	PAC:18193031	Os03g22060	Bradi1g63090	http://genomevolution.org/r/26ft	GRMZM2G044074	Identical Assignment
lop1	5	lo1 pI allergen homolog1		http://www.maizegdb.org/cgi-bin/displaylocusrecord.cgi?id=40145	AY197352	chr9	-1	GRMZM2G072886	2	Good	http://genomevolution.org/r/25jy		GRMZM2G177391	Sb01g029880	PAC:18191409	Os10g40090	Bradi3g32810	http://genomevolution.org/r/25jz	No Gene Identified by Maizesequence.org	NA
mha1	5	membrane H(+)-ATPase1		http://www.maizegdb.org/cgi-bin/displaylocusrecord.cgi?id=78901	U08985	chr7	-1	GRMZM2G104325	1	Good	http://genomevolution.org/r/25o4		GRMZM2G144821	Sb02g005440	PAC:18183066	Os07g09340	Bradi1g54850	http://genomevolution.org/r/25o5	No Gene Identified by Maizesequence.org	NA
ndk1	5	nucleotide diphosphate kinase1		http://www.maizegdb.org/cgi-bin/displaylocusrecord.cgi?id=82035	T18831	chr7	-1	GRMZM2G134797	1	Can't proof	http://genomevolution.org/r/25r0		chr2:200684613-200794829	Sb02g033710	PAC:18182509	Os07g30970	Bradi1g27120	http://genomevolution.org/r/26hi	No Gene Identified by Maizesequence.org	NA
pip1b	5	plasma membrane intrinsic protein1		http://www.maizegdb.org/cgi-bin/displaylocusrecord.cgi?id=319246	AF131201	chr5	1	AC209208.3_FG002	1	maizesequence.org skips 3' UTR	http://genomevolution.org/r/25c4		GRMZM2G392975	Sb04g032430	PAC:18170819	Os02g44630	Bradi3g51390	http://genomevolution.org/r/25c5	AC209208.3_FG002	Identical Assignment
pip2a	5	plasma membrane intrinsic protein2		http://www.maizegdb.org/cgi-bin/displaylocusrecord.cgi?id=319249	AF130975	chr2	-1	GRMZM2G178693	1	Good	http://genomevolution.org/r/25vl		chr10:130910211-131094948	Sb06g023240	PAC:18204775	Os04g44570	Bradi5g16370	http://genomevolution.org/r/26c1	No Gene Identified by Maizesequence.org	NA
plt2	5	phospholipid transfer protein homolog2		http://www.maizegdb.org/cgi-bin/displaylocusrecord.cgi?id=120441	U66105	chr3	-1	GRMZM2G010868	2	Good	http://genomevolution.org/r/25du		GRMZM5G898444	Sb08g002670	PAC:18201392	Os11g02424	too big a gap	http://genomevolution.org/r/25dv	No Gene Identified by Maizesequence.org	NA
ppp1	5	pyrophosphate-energized proton pump1		http://www.maizegdb.org/cgi-bin/displaylocusrecord.cgi?id=64563	T18800	chr5	-1	GRMZM2G090718	1	3' end half of gene sequence missing	http://genomevolution.org/r/25mg		chr4:178194539-178436867	Sb04g034340	PAC:18171145	Os02g52940	Bradi3g57820	http://genomevolution.org/r/26go	No Gene Identified by Maizesequence.org	NA
psei2	5	cystatin2		http://www.maizegdb.org/cgi-bin/displaylocusrecord.cgi?id=111927	D63342	chr8	-1	GRMZM2G012160	2	Good	http://genomevolution.org/r/25e2		GRMZM5G858738	Sb03g037370	PAC:18175081	Os01g58890	Bradi2g52670	http://genomevolution.org/r/25e3	GRMZM2G012160	Identical Assignment
ptk1	5	protein kinase1		http://www.maizegdb.org/cgi-bin/displaylocusrecord.cgi?id=30143	X52384	chr6	1	GRMZM2G328785	1	Good	http://genomevolution.org/r/25wj	GRMZM2G328772	chr8:110326401-110528523	Sb09g008070	no synteny	no synteny	no synteny	http://genomevolution.org/r/25wk	GRMZM2G328785	Identical Assignment
rth3	5	roothair defective3	Y	http://www.maizegdb.org/cgi-bin/displaylocusrecord.cgi?id=60515	AY265855	chr1	1	GRMZM2G377215	1	Good	http://genomevolution.org/r/25xn		GRMZM2G006830	Sb01g037850	PAC:18192604	Os03g18910	Bradi1g64820	http://genomevolution.org/r/25xo	GRMZM2G377215	Identical Assignment
sam2	5	S-adenosyl methionine decarboxylase2		http://www.maizegdb.org/cgi-bin/displaylocusrecord.cgi?id=248576	W99255	chr2	-1	GRMZM2G154397	1	Can't proof	http://genomevolution.org/r/25sr		GRMZM2G125635	Sb06g021540	PAC:18202898	Os04g42090	Bradi5g14640	http://genomevolution.org/r/25ss	GRMZM2G154397	Identical Assignment
stk1	5	serine threonine kinase1		http://www.maizegdb.org/cgi-bin/displaylocusrecord.cgi?id=954142	EF523347	chr9	1	GRMZM2G165433	1	Good	http://genomevolution.org/r/25u9	GRMZM2G465296	chr6:107102688-107370412	Sb10g006130	PAC:18197068	Os06g09230	Bradi1g46860	http://genomevolution.org/r/26i3	GRMZM2G165433	Identical Assignment
tub3	5	beta tubulin3		http://www.maizegdb.org/cgi-bin/displaylocusrecord.cgi?id=56923	X74654	chr1	-1	GRMZM2G108766	1	Good	http://genomevolution.org/r/25og		GRMZM2G066191	Sb01g012740	PAC:18191607	Os03g45920	Bradi1g13090	http://genomevolution.org/r/25oh	No Gene Identified by Maizesequence.org	NA
vp14	5	viviparous14	Y	http://www.maizegdb.org/cgi-bin/displaylocusrecord.cgi?id=97589	U95953	chr1	-1	GRMZM2G014392	1	Good	http://genomevolution.org/r/25ea		GRMZM5G838285	Sb01g013520	PAC:18193097	Os03g44380	Bradi1g13760	http://genomevolution.org/r/26f9	No Gene Identified by Maizesequence.org	NA
wc1	5	white cap1	Y	http://www.maizegdb.org/cgi-bin/displaylocusrecord.cgi?id=12747	DQ100346	chr9	-1	GRMZM2G057243	2	Good	http://genomevolution.org/r/25ig		GRMZM2G070933	Sb01g047540	chr1:52476487-53490628	too big a gap	chr1:71575893-72588253	http://genomevolution.org/r/26fz	GRMZM2G057243	Identical Assignment
zag5	5	zea agamous5		http://www.maizegdb.org/cgi-bin/displaylocusrecord.cgi?id=41346	L46398	chr4	1	GRMZM2G003514	2	Good	http://genomevolution.org/r/25d2		GRMZM2G160565	Sb04g031750	PAC:18173988	Os02g45770	Bradi3g51800	http://genomevolution.org/r/25d3	No Gene Identified by Maizesequence.org	NA
zmm7	5	Zea mays MADS7		http://www.maizegdb.org/cgi-bin/displaylocusrecord.cgi?id=104403	Y09302	chr2	1	GRMZM2G129034	2	Good	http://genomevolution.org/r/25qm		GRMZM2G097059	Sb02g029310	PAC:18180686	Os09g32948	Bradi4g34680	http://genomevolution.org/r/25qn	No Gene Identified by Maizesequence.org	NA
zmm8	5	Zea mays MADS8		http://www.maizegdb.org/cgi-bin/displaylocusrecord.cgi?id=112354	Y09303	chr9	1	GRMZM2G102161	2	Good	http://genomevolution.org/r/25nw		GRMZM2G099522	Sb01g042840	PAC:18195007	Os03g11614	Bradi1g69890	http://genomevolution.org/r/25nx	GRMZM2G102161	Identical Assignment
abp4	4	auxin binding protein homolog4		http://www.maizegdb.org/cgi-bin/displaylocusrecord.cgi?id=65339	L08426	chr10	-1	GRMZM2G064371	1	Good	http://genomevolution.org/r/25ja	GRMZM2G078508	no synteny	Sb08g016760	PAC:18189661	Os12g34450	Bradi4g06030	http://genomevolution.org/r/2663	GRMZM2G064371	Identical Assignment
arpp1a	4	acidic ribosomal protein P1a		http://www.maizegdb.org/cgi-bin/displaylocusrecord.cgi?id=9018892	U62752	chr6	1	GRMZM2G032315	1	Good	http://genomevolution.org/r/25gi		GRMZM2G157443	Sb07g001570	PAC:18185470	Os08g02340	Bradi3g13750	http://genomevolution.org/r/25gj	GRMZM2G032315	Identical Assignment
betl3	4	basal endosperm transfer layer3		http://www.maizegdb.org/cgi-bin/displaylocusrecord.cgi?id=109818	AJ133530	chr3	1	GRMZM2G175976	2	Good	http://genomevolution.org/r/25vd		no synteny	too big a gap	no synteny	no synteny	no synteny	http://genomevolution.org/r/25ve	No Gene Identified by Maizesequence.org	NA
cal1	4	calmodulin1		http://www.maizegdb.org/cgi-bin/displaylocusrecord.cgi?id=61658	X74490	chr6	-1	GRMZM2G117582	1	Good	http://genomevolution.org/r/25pk		GRMZM5G895362	Sb09g024030	PAC:18168223	Os05g41270	Bradi2g21460	http://genomevolution.org/r/26h9	No Gene Identified by Maizesequence.org	NA
cap1	4	calcium pump1		http://www.maizegdb.org/cgi-bin/displaylocusrecord.cgi?id=112965	AF096871	chr8	1	GRMZM2G056014	2	Good	http://genomevolution.org/r/25ia		too big a gap	Sb09g001850	too big a gap	Os05g02940	too big a gap	http://genomevolution.org/r/26fy	No Gene Identified by Maizesequence.org	NA
ccp1	4	cysteine protease1		http://www.maizegdb.org/cgi-bin/displaylocusrecord.cgi?id=99058	D45402	chr5	1	GRMZM2G098298	1	Good	http://genomevolution.org/r/25na		no synteny	too big a gap	too big a gap	too big a gap	too big a gap	http://genomevolution.org/r/25nb	GRMZM2G098298	Identical Assignment
cf1	4	camouflage1	Y	http://www.maizegdb.org/cgi-bin/displaylocusrecord.cgi?id=9017732	BT042702	chr5	1	GRMZM2G026117	1	Good	http://genomevolution.org/r/25g0		GRMZM2G041159	Sb04g004630	PAC:18171710	Os02g07230	Bradi3g05160	http://genomevolution.org/r/25g1	No Gene Identified by Maizesequence.org	NA
chn2	4	chitinase2		http://www.maizegdb.org/cgi-bin/displaylocusrecord.cgi?id=25133	L00973		-1	GRMZM2G145461	2	Good	http://genomevolution.org/r/25rz	GRMZM2G145518||GRMZM2G447967	GRMZM2G145518	chr10:59525238-60462013	PAC:18196692	Os06g51050	too big a gap	http://genomevolution.org/r/26aa	No Gene Identified by Maizesequence.org	NA
cka1	4	CK2 protein kinase alpha 1		http://www.maizegdb.org/cgi-bin/displaylocusrecord.cgi?id=941059	X61387	chr2	-1	GRMZM2G143602	2	Good	http://genomevolution.org/r/25rr		GRMZM5G845755	Sb02g001110	PAC:18182960	Os07g02350	Bradi1g59010	http://genomevolution.org/r/25rs	No Gene Identified by Maizesequence.org	NA
cka2	4	CK2 protein kinase alpha 2		http://www.maizegdb.org/cgi-bin/displaylocusrecord.cgi?id=952192	Y11526	chr1	-1	GRMZM2G047855	1	Good	http://genomevolution.org/r/25hu		GRMZM2G141903	Sb01g007270	PAC:18191037	Os03g55389	Bradi1g07810	http://genomevolution.org/r/26fu	No Gene Identified by Maizesequence.org	NA
cpn1	4	chaperonin 1		http://www.maizegdb.org/cgi-bin/displaylocusrecord.cgi?id=65668	L21007	chr5		GRMZM2G458208-GRMZM2G111477	2	Gene split by maizesequence.org	http://genomevolution.org/r/25zb		no synteny	Sb01g020010	PAC:18191225	Os10g32550	Bradi3g28070	http://genomevolution.org/r/25zc	No Gene Identified by Maizesequence.org	NA
crs1	4	chloroplast RNA splicing1		http://www.maizegdb.org/cgi-bin/displaylocusrecord.cgi?id=106357	AY109620	chr1	-1	GRMZM2G078412	1	Good	http://genomevolution.org/r/25kg		chr4:23681994-24163075	no synteny	PAC:18186042	Os08g27150	too big a gap	http://genomevolution.org/r/26g8	GRMZM2G078412	Identical Assignment
cta1	4	chitinase A1		http://www.maizegdb.org/cgi-bin/displaylocusrecord.cgi?id=25946	M84164	chr2	1	GRMZM2G051943	1	Good	http://genomevolution.org/r/25i2	GRMZM2G051921||GRMZM2G052175||GRMZM2G122708	GRMZM2G051921	Sb06g021230	PAC:18204845	Os04g41680	Bradi5g14430	http://genomevolution.org/r/265h	No Gene Identified by Maizesequence.org	NA
cyc2	4	cyclin2		http://www.maizegdb.org/cgi-bin/displaylocusrecord.cgi?id=86021	U10077	chr3		chr3:41183262		No gene model	http://genomevolution.org/r/25co							http://genomevolution.org/r/25cp	No Gene Identified by Maizesequence.org	NA
cyc3	4	cyclin3		http://www.maizegdb.org/cgi-bin/displaylocusrecord.cgi?id=86019	U10076	chr6	-1	GRMZM2G073671	2	Good	http://genomevolution.org/r/25k2		chr5:63277604-63426448	Sb10g030790	PAC:18197914	Os06g51110	too big a gap	http://genomevolution.org/r/26g5	No Gene Identified by Maizesequence.org	NA
cyp1	4	cytochrome P450 homolog1		http://www.maizegdb.org/cgi-bin/displaylocusrecord.cgi?id=57310	T12664	chr3	1	GRMZM5G899349	2	Can't proof	http://genomevolution.org/r/2612		GRMZM2G068465	Sb08g002250	no synteny	no synteny	too big a gap	http://genomevolution.org/r/2613	No Gene Identified by Maizesequence.org	NA
dlf1	4	delayed flowering1	Y	http://www.maizegdb.org/cgi-bin/displaylocusrecord.cgi?id=60468	EF093789	chr7	7	GRMZM2G067921	NA	Good	http://genomevolution.org/r/2617	GRMZM5G858064	no synteny	no synteny	PAC:18182388	Os09g36910	no synteny	http://genomevolution.org/r/26jb	No Gene Identified by Maizesequence.org	NA
eif5	4	eucaryotic translation initiation factor5		http://www.maizegdb.org/cgi-bin/displaylocusrecord.cgi?id=136230	X99517	chr4	-1	GRMZM2G165917	2	Good	http://genomevolution.org/r/25ud	GRMZM5G899228	chr5:80142163-80247586	Sb04g003550	PAC:18174414	too big a gap	Bradi3g03850	http://genomevolution.org/r/25ue	GRMZM2G165917	Identical Assignment
eif5a	4	elongation initiation factor5A		http://www.maizegdb.org/cgi-bin/displaylocusrecord.cgi?id=105534	H35879	chr2	-1	GRMZM2G113696	2	Can't proof	http://genomevolution.org/r/25p6		GRMZM2G144030	Sb02g038290	PAC:18184870	Os07g40580	Bradi1g22670	http://genomevolution.org/r/25p7	No Gene Identified by Maizesequence.org	NA
elm1	4	elongated mesocotyl1		http://www.maizegdb.org/cgi-bin/displaylocusrecord.cgi?id=953886	AY560384	chr8	1	GRMZM5G861678	2	Good	http://genomevolution.org/r/260o		chr3:149389218-149602729	Sb03g045760	PAC:18180338	Os01g72090	Bradi2g60670	http://genomevolution.org/r/26j7	GRMZM5G861678	Identical Assignment
fdx3	4	ferredoxin3		http://www.maizegdb.org/cgi-bin/displaylocusrecord.cgi?id=40773	AB001387	chr1	1	GRMZM2G053458	1	Good	http://genomevolution.org/r/25i6		chr5:1534698-1660013	Sb01g002180	PAC:18194249	Os03g61960	Bradi1g02590	http://genomevolution.org/r/26fx	GRMZM2G053458	Identical Assignment
grp3	4	glycine-rich protein3		http://www.maizegdb.org/cgi-bin/displaylocusrecord.cgi?id=411251	Y07781	chr5	1	GRMZM2G154954	2	Good	http://genomevolution.org/r/25sz		GRMZM2G067315	too big a gap	PAC:18195983	too big a gap	Bradi3g27840	http://genomevolution.org/r/25t0	GRMZM2G154954	Identical Assignment
hsp70-4	4	heat shock protein70-4		http://www.maizegdb.org/cgi-bin/displaylocusrecord.cgi?id=78932	X78414	chr3	-1	GRMZM2G340251	2	Good	http://genomevolution.org/r/25wz	GRMZM5G817178	GRMZM2G056039	Sb08g018750	too big a gap	Os12g38180	Bradi4g04220	http://genomevolution.org/r/25x0	No Gene Identified by Maizesequence.org	NA
ibp2	4	initiator-binding protein2		http://www.maizegdb.org/cgi-bin/displaylocusrecord.cgi?id=77925	X79086	chr1	1	GRMZM2G110309	1	Good	http://genomevolution.org/r/25oo		GRMZM2G063151	Sb01g039650	PAC:18194473	Os03g16700	Bradi1g66680	http://genomevolution.org/r/25op	No Gene Identified by Maizesequence.org	NA
isr1	4	inhibitor of striate1	Y	http://www.maizegdb.org/cgi-bin/displaylocusrecord.cgi?id=12346	AF296824	chr10	-1	GRMZM5G803874	2	Good	http://genomevolution.org/r/25zr		chr2:18369638-18561987	Sb06g025010	PAC:18203058	Os04g47020	Bradi5g18060	http://genomevolution.org/r/25zs	No Gene Identified by Maizesequence.org	NA
lhcb7	4	light harvesting complex mesophyll7		http://www.maizegdb.org/cgi-bin/displaylocusrecord.cgi?id=25857	X53398	chr6	1	GRMZM2G402936	1	Good	http://genomevolution.org/r/25y7		GRMZM2G155216	Sb09g028720	PAC:18169383	chr5:28081764-28748003	Bradi2g16290	http://genomevolution.org/r/26iq	No Gene Identified by Maizesequence.org	NA
lhcb9	4	light harvesting chlorophyll binding protein9		http://www.maizegdb.org/cgi-bin/displaylocusrecord.cgi?id=65857	X68682	chr1		GRMZM2G018627	1	Good|near identical paralog: GRMZM2G414192	http://genomevolution.org/r/25f8	GRMZM2G321320||GRMZM2G414192||GRMZM2G414195	GRMZM2G414192	Sb01g015400	PAC:18194789	Os03g39610	Bradi1g15290	http://genomevolution.org/r/2645	No Gene Identified by Maizesequence.org	NA
lkrsdh1	4	lysine-ketoglutarate reductase/saccharopine dehydrogenase1		http://www.maizegdb.org/cgi-bin/displaylocusrecord.cgi?id=315260	AF271636	chr4	-1	GRMZM2G181362	2	Good	http://genomevolution.org/r/25vt		GRMZM2G110324	Sb04g035220	PAC:18172910	Os02g54254	too big a gap	http://genomevolution.org/r/25vu	No Gene Identified by Maizesequence.org	NA
lox1	4	lipoxygenase1		http://www.maizegdb.org/cgi-bin/displaylocusrecord.cgi?id=64911	DQ335760	chr3	1	GRMZM2G156861	1	Two tandem duplicates merged into one gene by maizesequence.org?	http://genomevolution.org/r/25tf	GRMZM2G458554	GRMZM2G117321	Sb03g042440	PAC:18178280	chr1:38780116-39263267	chr2:55371971-55698467	http://genomevolution.org/r/26hu	No Gene Identified by Maizesequence.org	NA
mbf1	4	multi-protein bridging factor homolog1		http://www.maizegdb.org/cgi-bin/displaylocusrecord.cgi?id=112655	T14752	chr4	-1	GRMZM2G101480	2	Good	http://genomevolution.org/r/25nq		GRMZM5G800112	Sb07g014940	PAC:18185874	no synteny	no synteny	http://genomevolution.org/r/25nr	No Gene Identified by Maizesequence.org	NA
mta1	4	ribosomal protein		http://www.maizegdb.org/cgi-bin/displaylocusrecord.cgi?id=64627	T14712	chr1	1	GRMZM2G090422	1	Can't proof	http://genomevolution.org/r/25mc		GRMZM2G072315	Sb01g007690	PAC:18194203	Os03g54860	Bradi1g08260	http://genomevolution.org/r/25md	No Gene Identified by Maizesequence.org	NA
nbp1	4	nucleic acid binding protein1		http://www.maizegdb.org/cgi-bin/displaylocusrecord.cgi?id=25813	M74566	chr7	1	GRMZM2G011129	1	Good	http://genomevolution.org/r/25dw		chr2:166294756-166398296	Sb02g011330	PAC:18184218	no synteny	Bradi4g38260	http://genomevolution.org/r/25dx	GRMZM2G011129	Identical Assignment
ocl4	4	outer cell layer4		http://www.maizegdb.org/cgi-bin/displaylocusrecord.cgi?id=314447	AJ250986	chr1	-1	GRMZM2G123140	1	Good	http://genomevolution.org/r/25qa	GRMZM5G875327	no synteny	Sb01g028160	PAC:18193087	Os10g42490	Bradi3g34410	http://genomevolution.org/r/26hc	No Gene Identified by Maizesequence.org	NA
ohp1	4	opaque2 heterodimerizing protein1		http://www.maizegdb.org/cgi-bin/displaylocusrecord.cgi?id=25163	L00623	chr1	-1	GRMZM2G016150	1	Good	http://genomevolution.org/r/25eo	GRMZM2G019446	GRMZM2G019446	Sb01g005170	PAC:18191498	Os03g58250	Bradi1g05480	http://genomevolution.org/r/25ep	No Gene Identified by Maizesequence.org	NA
ohp2	4	opaque2 heterodimerizing protein2		http://www.maizegdb.org/cgi-bin/displaylocusrecord.cgi?id=30200	L06478	chr5	1	GRMZM2G007063	2	Good	http://genomevolution.org/r/25dg		GRMZM2G019446	Sb01g005170	PAC:18183040	Os03g58250	Bradi1g05480	http://genomevolution.org/r/25dh	GRMZM2G007063	Identical Assignment
pgl2	4	polygalacturonase2		http://www.maizegdb.org/cgi-bin/displaylocusrecord.cgi?id=47536	X57628	chr6	-1	GRMZM2G320175	2	Good	http://genomevolution.org/r/25wb	GRMZM2G058033||GRMZM2G153666||GRMZM2G160526||GRMZM2G160626||GRMZM2G162384||GRMZM2G306693||GRMZM5G880653	no synteny	Sb10g024010	too big a gap	Os06g40890	Bradi1g36100	http://genomevolution.org/r/26ce	No Gene Identified by Maizesequence.org	NA
pip1c	4	plasma membrane intrinsic protein1		http://www.maizegdb.org/cgi-bin/displaylocusrecord.cgi?id=403337	AF326487	chr4	1	GRMZM2G392975	2	Good	http://genomevolution.org/r/25xv		AC209208.3_FG002	Sb04g032430	PAC:18170819	Os02g44630	Bradi3g51390	http://genomevolution.org/r/25xw	No Gene Identified by Maizesequence.org	NA
ppr5	4	pentatricopeptide repeat 5		http://www.maizegdb.org/cgi-bin/displaylocusrecord.cgi?id=1232899	EU037901	chr4	-1	GRMZM2G025409	2	Good	http://genomevolution.org/r/25fw		GRMZM2G313326	Sb04g027800	PAC:18174466	Os02g51480	Bradi3g59120	http://genomevolution.org/r/25fx	No Gene Identified by Maizesequence.org	NA
prc1	4	proteasome C9 1		http://www.maizegdb.org/cgi-bin/displaylocusrecord.cgi?id=64585	T14766	chr6	-1	GRMZM2G120047	2	Can't proof	http://genomevolution.org/r/25q2		GRMZM2G005080	Sb10g004740	too big a gap	Os06g07140	Bradi1g48220	http://genomevolution.org/r/25q3	No Gene Identified by Maizesequence.org	NA
ra3	4	ramosa3	Y	http://www.maizegdb.org/cgi-bin/displaylocusrecord.cgi?id=12579	DQ436920	chr7	-1	GRMZM2G014729	1	Good	http://genomevolution.org/r/25ec		GRMZM2G117564	Sb02g039820	PAC:18182587	Os07g43160	Bradi1g21420	http://genomevolution.org/r/25ed	GRMZM2G014729	Identical Assignment
rnc1	4	ribonuclease III domain protein1		http://www.maizegdb.org/cgi-bin/displaylocusrecord.cgi?id=941309	EU971053	chr3	1	GRMZM2G035820	1	Good	http://genomevolution.org/r/25gu		GRMZM2G121783	Sb03g037610	PAC:18178895	Os01g59510	Bradi2g52920	http://genomevolution.org/r/25gv	GRMZM2G035820	Identical Assignment
rop2	4	Rho-related protein from plants2		http://www.maizegdb.org/cgi-bin/displaylocusrecord.cgi?id=231132	AY163379	chr4	-1	GRMZM5G846811	2	Good	http://genomevolution.org/r/260i		GRMZM5G803949	Sb04g001690	PAC:18174712	Os02g02840	Bradi3g01930	http://genomevolution.org/r/260j	GRMZM5G846811	Identical Assignment
rtp1	4	Zea root preferential4		http://www.maizegdb.org/cgi-bin/displaylocusrecord.cgi?id=65331	L14063	chr4	-1	GRMZM2G017557	1	Good	http://genomevolution.org/r/25f0		chr2:219679953-219956761	Sb05g006910	too big a gap	too big a gap	too big a gap	http://genomevolution.org/r/26ff	No Gene Identified by Maizesequence.org	NA
sbe3	4	starch branching enzyme3		http://www.maizegdb.org/cgi-bin/displaylocusrecord.cgi?id=415181	U65948	chr2	1	GRMZM2G073054	1	Good	http://genomevolution.org/r/25k0		GRMZM2G032628	Sb06g015360	PAC:18204584	Os04g33460	Bradi5g09170	http://genomevolution.org/r/25k1	No Gene Identified by Maizesequence.org	NA
sci1	4	subtilisin-chymotrypsin inhibitor homolog1		http://www.maizegdb.org/cgi-bin/displaylocusrecord.cgi?id=65019	X69972	chr8	1	GRMZM2G028393	2	Good	http://genomevolution.org/r/25gc	GRMZM2G028656||GRMZM2G042789	GRMZM2G042789	too big a gap	too big a gap	too big a gap	Bradi2g39280	http://genomevolution.org/r/264n	GRMZM2G028393	Identical Assignment
sdh1	4	sorbitol dehydrogenase homolog1		http://www.maizegdb.org/cgi-bin/displaylocusrecord.cgi?id=63957	DQ191049	chr1	1	GRMZM2G175423	1	Good	http://genomevolution.org/r/25v9		too big a gap	Sb07g025220	PAC:18187738	Os08g43190	Bradi3g42030	http://genomevolution.org/r/25va	GRMZM2G175423	Identical Assignment
stp1	4	sugar transport1		http://www.maizegdb.org/cgi-bin/displaylocusrecord.cgi?id=57402	T12737	chr8	-1	GRMZM2G097768	2	Can't proof	http://genomevolution.org/r/25n4		GRMZM2G030274	Sb09g029520	PAC:18169482	Os05g50280	Bradi2g14900	http://genomevolution.org/r/25n5	No Gene Identified by Maizesequence.org	NA
tif5A	4	eukaryotic translation initiation factor 5A		http://www.maizegdb.org/cgi-bin/displaylocusrecord.cgi?id=9018895	AF034943	chr7	-1	GRMZM2G144030	1	Good	http://genomevolution.org/r/25rt		GRMZM2G113696	Sb02g038290	PAC:18184870	Os07g40580	Bradi1g22670	http://genomevolution.org/r/25ru	GRMZM2G113696	Different Assignment	http://genomevolution.org/r/26jv	Two independent GenBank records for tif5A match against both genes	but both show greater sequence identity to the one identified by us than the one identified by maizesequence.org. The location of the gene we identified agrees with the genetic location of tif5A	the location of the gene identifed by maizesequence.org does not.
tm20	4	transmembrane protein20		http://www.maizegdb.org/cgi-bin/displaylocusrecord.cgi?id=293069	X97570	chr6	-1	GRMZM2G036564	2	Good	http://genomevolution.org/r/25h0	GRMZM2G313761	GRMZM2G056826	Sb10g010780	PAC:18198129	no synteny	Bradi1g43270	http://genomevolution.org/r/25h1	No Gene Identified by Maizesequence.org	NA
tsh1	4	tasselsheath1	Y	http://www.maizegdb.org/cgi-bin/displaylocusrecord.cgi?id=60537		chr6	-1	GRMZM2G325850	1	No GenBank Record|gene name in publication	http://genomevolution.org/r/261b		GRMZM2G397616	Sb09g029510	PAC:18169249	Os05g50270	Bradi2g14890	http://genomevolution.org/r/261c	No Gene Identified by Maizesequence.org	NA
ugp1	4	UDP-glucose pyrophosphorylase1		http://www.maizegdb.org/cgi-bin/displaylocusrecord.cgi?id=64409	T14797	chr7	-1	GRMZM2G032003	1	Can't proof	http://genomevolution.org/r/25gg		AC233910.1_FG005	Sb02g032250	PAC:18181652	Os09g38030	Bradi4g37350	http://genomevolution.org/r/25gh	No Gene Identified by Maizesequence.org	NA
vpp1	4	vacuolar proton pump homolog1		http://www.maizegdb.org/cgi-bin/displaylocusrecord.cgi?id=118875	AY103622	chr9	-1	GRMZM2G014240	1	Good	http://genomevolution.org/r/25e8		GRMZM2G148200	Sb10g005250	PAC:18197356	Os06g08080	Bradi1g47770	http://genomevolution.org/r/25e9	GRMZM2G069095	Different Assignment		Neither gene maps to correct chromosome	different GenBank records match different genes
wip1	4	wound induced protein1		http://www.maizegdb.org/cgi-bin/displaylocusrecord.cgi?id=46003	X71396	chr8	-1	GRMZM2G156632	2	Good	http://genomevolution.org/r/25td		chr3:22296626-22438596	Sb03g007180	PAC:18178587	Os01g04050	Bradi2g02150	http://genomevolution.org/r/26ay	No Gene Identified by Maizesequence.org	NA
zag4	4	zea agamous4		http://www.maizegdb.org/cgi-bin/displaylocusrecord.cgi?id=41327	L46399	chr9	-1	GRMZM2G531231	1	weird gene model	http://genomevolution.org/r/25zh		AC195587.4_FG005	Sb10g004390	PAC:18199200	Os06g06750	Bradi1g48520	http://genomevolution.org/r/25zi	No Gene Identified by Maizesequence.org	NA
zmm6	4	Zea mays MADS6		http://www.maizegdb.org/cgi-bin/displaylocusrecord.cgi?id=105274	AJ430692	chr1	1	GRMZM2G159397	1	Good	http://genomevolution.org/r/25tp	GRMZM2G098986	chr4:44135640-44910547	Sb07g026180	PAC:18187519	Os08g41950	Bradi3g41260	http://genomevolution.org/r/26hx	No Gene Identified by Maizesequence.org	NA
a4	3	anthocyaninless4	Y	http://www.maizegdb.org/cgi-bin/displaylocusrecord.cgi?id=402641	Y16040	chr8	1	GRMZM2G013726	2	Good|inverted repeats surround gene	http://genomevolution.org/r/25e6		GRMZM2G026930	Sb03g028890	PAC:18178383	Os01g44260	Bradi2g44480	http://genomevolution.org/r/25e7	No Gene Identified by Maizesequence.org	NA
adf1	3	actin depolymerizing factor1		http://www.maizegdb.org/cgi-bin/displaylocusrecord.cgi?id=113739	X80820	chr7	1	GRMZM2G117603	1	Good	http://genomevolution.org/r/25pm		GRMZM2G097122	Sb02g033380	PAC:18182325	Os07g30090	Bradi1g27720	http://genomevolution.org/r/25pn	No Gene Identified by Maizesequence.org	NA
ahh1	3	adenosyl homocysteine hydrolase1		http://www.maizegdb.org/cgi-bin/displaylocusrecord.cgi?id=82085	AW424691	chr4	1	GRMZM2G015295	1	Can't proof	http://genomevolution.org/r/25ei	GRMZM2G494688	too big a gap	too big a gap	too big a gap	Os11g26850	Bradi4g19460	http://genomevolution.org/r/25ej	No Gene Identified by Maizesequence.org	NA
akh1	3	aspartate kinase-homoserine dehydrogenase1		http://www.maizegdb.org/cgi-bin/displaylocusrecord.cgi?id=66588	L33912	chr4		GRMZM2G365423-GRMZM2G389303-GRMZM2G437977	2	Gene split by maizesequence.org three genes	http://genomevolution.org/r/25xh		no synteny	too big a gap	too big a gap	no synteny	no synteny	http://genomevolution.org/r/26cz	No Gene Identified by Maizesequence.org	NA
amyb5	3	beta amylase5		http://www.maizegdb.org/cgi-bin/displaylocusrecord.cgi?id=850838	Z25871	chr7	1	GRMZM2G058310	1	Good	http://genomevolution.org/r/25io	GRMZM2G358467	GRMZM2G358467	Sb02g035600	PAC:18184782	Os07g35940	Bradi1g25440	http://genomevolution.org/r/25ip	GRMZM2G058310	Identical Assignment
ane1	3	androgenic embryo1	Y	http://www.maizegdb.org/cgi-bin/displaylocusrecord.cgi?id=918124	AJ011559	chr4	-1	GRMZM2G039942	NA	Good	http://genomevolution.org/r/25hg		no synteny	no synteny	no synteny	no synteny	no synteny	http://genomevolution.org/r/25hh	No Gene Identified by Maizesequence.org	NA
ane3	3	androgenic embryo3	Y	http://www.maizegdb.org/cgi-bin/displaylocusrecord.cgi?id=918125	AJ307880	chr10	1	GRMZM2G372553	1	Can't proof	http://genomevolution.org/r/25xj		chr4:33971692-34314394	Sb07g003415	PAC:18187702	chr8:2932877-3054776	chr3:15151970-15264370	http://genomevolution.org/r/26d0	GRMZM2G372553	Identical Assignment
cal2	3	calmodulin2		http://www.maizegdb.org/cgi-bin/displaylocusrecord.cgi?id=112129	X77397	chr3	1	GRMZM2G067511	1	Good	http://genomevolution.org/r/25jg		GRMZM2G044963	chr3:10895034-11088655	PAC:18178427	Os01g16240	Bradi2g10010	http://genomevolution.org/r/26g3	GRMZM2G067511	Identical Assignment
cal3	3	calmodulin3		http://www.maizegdb.org/cgi-bin/displaylocusrecord.cgi?id=112124	X77396	chr1	1	GRMZM2G152891	1	Good	http://genomevolution.org/r/25sn	GRMZM2G452760	GRMZM2G333354	Sb01g037010	PAC:18193248	Os03g20370	Bradi1g64020	http://genomevolution.org/r/26hs	No Gene Identified by Maizesequence.org	NA
cesa1	3	cellulose synthase1		http://www.maizegdb.org/cgi-bin/displaylocusrecord.cgi?id=309268	AF200525	chr8	1	GRMZM2G112336	2	Good	http://genomevolution.org/r/25p0		GRMZM2G027723	Sb09g005280	PAC:18169857	too big a gap	Bradi2g34240	http://genomevolution.org/r/25p1	No Gene Identified by Maizesequence.org	NA
cesa2	3	cellulose synthase2		http://www.maizegdb.org/cgi-bin/displaylocusrecord.cgi?id=309271	AF200526	chr6	1	GRMZM2G027723	1	Good	http://genomevolution.org/r/25g8		GRMZM2G112336	Sb09g005280	PAC:18169857	Os05g08370	Bradi2g34240	http://genomevolution.org/r/25g9	No Gene Identified by Maizesequence.org	NA
cesa3	3	cellulose synthase3		http://www.maizegdb.org/cgi-bin/displaylocusrecord.cgi?id=309274	AF200527	chr3	1	GRMZM2G039454	1	Good	http://genomevolution.org/r/25he		chr8:17374406-17713224	Sb03g004310	PAC:18179439	chr1:3437238-3858481	Bradi2g03380	http://genomevolution.org/r/26fq	No Gene Identified by Maizesequence.org	NA
cesa5	3	cellulose synthase5		http://www.maizegdb.org/cgi-bin/displaylocusrecord.cgi?id=309286	AF200529	chr1	-1	GRMZM2G111642	1	Good	http://genomevolution.org/r/25os	GRMZM2G111837	chr5:3376421-3478948	Sb01g004210	PAC:18190769	Os03g59340	Bradi1g04600	http://genomevolution.org/r/26h6	GRMZM2G111642	Identical Assignment
cesa6	3	cellulose synthase6		http://www.maizegdb.org/cgi-bin/displaylocusrecord.cgi?id=309305	AF200530	chr1	1	GRMZM2G113137	1	Good	http://genomevolution.org/r/25p4		chr5:1513673-1621374	Sb01g002050	PAC:18194540	Os03g62090	Bradi1g02510	http://genomevolution.org/r/26h7	GRMZM2G113137	Identical Assignment
cesa7	3	cellulose synthase7		http://www.maizegdb.org/cgi-bin/displaylocusrecord.cgi?id=309291	AF200531	chr7	-1	GRMZM2G025231	1	Good	http://genomevolution.org/r/25fu		GRMZM2G028353	Sb02g010110	PAC:18181460	Os07g24190	Bradi1g29060	http://genomevolution.org/r/25fv	GRMZM2G025231	Identical Assignment
cesa8	3	cellulose synthase8		http://www.maizegdb.org/cgi-bin/displaylocusrecord.cgi?id=309307	AF200532	chr7	1	GRMZM2G177631	1	Good	http://genomevolution.org/r/25vh		GRMZM2G082580	Sb02g007810	PAC:18182624	too big a gap	Bradi1g53210	http://genomevolution.org/r/26ia	GRMZM2G177631	Identical Assignment
cesa9	3	cellulose synthase9		http://www.maizegdb.org/cgi-bin/displaylocusrecord.cgi?id=309315	AF200533	chr2		GRMZM2G018241	2	partial identical duplicate:GRMZM2G150404 |assembly errors?	http://genomevolution.org/r/25f4	GRMZM2G150404||GRMZM2G319836||GRMZM2G452739	GRMZM2G424832	Sb02g006290	PAC:18183648	Os07g10770	Bradi1g54250	http://genomevolution.org/r/25f5	No Gene Identified by Maizesequence.org	NA
chn3	3	chitinase3		http://www.maizegdb.org/cgi-bin/displaylocusrecord.cgi?id=65643	L16798	chr5	1	GRMZM2G389582	1	Good	http://genomevolution.org/r/25xr	GRMZM2G064360	GRMZM2G064360	chr10:60362013-60952691	PAC:18196692	Os06g51050	Bradi1g29890	http://genomevolution.org/r/26d4	No Gene Identified by Maizesequence.org	NA
cip1	3	cytokinin inducible protease1		http://www.maizegdb.org/cgi-bin/displaylocusrecord.cgi?id=64584	T14785	chr10	1	GRMZM2G009443	1	Can't proof	http://genomevolution.org/r/25do		chr3:98149258-98563013	chr8:15672577-16127244	PAC:18188479	no synteny	Bradi4g39880	http://genomevolution.org/r/263d	No Gene Identified by Maizesequence.org	NA
crr2	3	cytokinin response regulator2		http://www.maizegdb.org/cgi-bin/displaylocusrecord.cgi?id=248630	AB031012	chr10	1	GRMZM2G392101	2	Good	http://genomevolution.org/r/25xt		GRMZM2G040736	Sb06g032600	PAC:18203897	Os04g57720	Bradi5g25860	http://genomevolution.org/r/25xu	No Gene Identified by Maizesequence.org	NA
crt2	3	calreticulin2		http://www.maizegdb.org/cgi-bin/displaylocusrecord.cgi?id=117679	X89813	chr7	-1	GRMZM2G358059	1	Good	http://genomevolution.org/r/25x9		GRMZM2G074687	Sb02g007480	chr2:9068052-9459326	Os07g14270	chr1:51525345-51829532	http://genomevolution.org/r/26ik	GRMZM2G358059	Identical Assignment
cyp8	3	cytochrome P-450 8		http://www.maizegdb.org/cgi-bin/displaylocusrecord.cgi?id=54682	L23209	chr1	1	GRMZM2G167986	1	Good	http://genomevolution.org/r/25uj	GRMZM5G825885	chr5:35250286-35467227	Sb01g022690	PAC:18193629	Os10g26340	no synteny	http://genomevolution.org/r/25uk	GRMZM2G167986	Identical Assignment
dbf3	3	DRE-binding protein3		http://www.maizegdb.org/cgi-bin/displaylocusrecord.cgi?id=952759	AY964718		-1	GRMZM2G124037	2	Good	http://genomevolution.org/r/25qe	GRMZM2G124011	GRMZM2G069082	Sb02g030320	PAC:18183469	Os09g35020	Bradi4g35650	http://genomevolution.org/r/26hd	No Gene Identified by Maizesequence.org	NA
dmt101	3	DNA methyl transferase1		http://www.maizegdb.org/cgi-bin/displaylocusrecord.cgi?id=306165	AF229183	chr7	-1	GRMZM2G333916	1	Good	http://genomevolution.org/r/25wl		chr2:233307394-233451043	Sb02g004680	PAC:18180811	Os07g08500	Bradi1g55290	http://genomevolution.org/r/25wm	No Gene Identified by Maizesequence.org	NA
elfg1	3	elongation factor gamma1		http://www.maizegdb.org/cgi-bin/displaylocusrecord.cgi?id=64574	T14690	chr6	1	GRMZM2G122871	2	Can't proof	http://genomevolution.org/r/25q8		too big a gap	Sb10g022570	PAC:18199136	too big a gap	Bradi1g37490	http://genomevolution.org/r/25q9	No Gene Identified by Maizesequence.org	NA
expa1	3	alpha expansin1		http://www.maizegdb.org/cgi-bin/displaylocusrecord.cgi?id=403647	AY104146	chr3	-1	GRMZM2G339122	1	Good	http://genomevolution.org/r/25wv		chr8:170230424-170337541	Sb03g038290	PAC:18177506	Os01g60770	Bradi2g53580	http://genomevolution.org/r/26ih	GRMZM2G339122	Identical Assignment
fea2	3	fasciated ear2	Y	http://www.maizegdb.org/cgi-bin/displaylocusrecord.cgi?id=308904	AY055124	chr4	-1	GRMZM2G104925	2	Good	http://genomevolution.org/r/25oa		chr5:181982875-182138256	Sb04g025240	PAC:18174128	Os02g39100	Bradi3g48060	http://genomevolution.org/r/26h1	No Gene Identified by Maizesequence.org	NA
hda108	3	histone deacetylase		http://www.maizegdb.org/cgi-bin/displaylocusrecord.cgi?id=887773	AF440226	chr4	-1	GRMZM2G136067	2	Good	http://genomevolution.org/r/25r6		no synteny	too big a gap	PAC:18186379	no synteny	no synteny	http://genomevolution.org/r/25r7	GRMZM2G136067	Identical Assignment
his2a1	3	histone2A1		http://www.maizegdb.org/cgi-bin/displaylocusrecord.cgi?id=77942	U08225	chr9	1	GRMZM2G305046	2	Good	http://genomevolution.org/r/25vx	GRMZM2G305035	chr1:41808424-42011815	Sb01g039240	PAC:18191957	Os03g17100	Bradi1g66360	http://genomevolution.org/r/25vy	No Gene Identified by Maizesequence.org	NA
his2b1	3	histone2b1		http://www.maizegdb.org/cgi-bin/displaylocusrecord.cgi?id=25942	X57312	chr7	1	GRMZM2G071959	1	Good	http://genomevolution.org/r/25jw		GRMZM2G057852	Sb02g025410	chr2:28772140-29369437	chr9:15818244-16396427	chr4:36651237-37160395	http://genomevolution.org/r/26g4	No Gene Identified by Maizesequence.org	NA
his2b2	3	histone2b2		http://www.maizegdb.org/cgi-bin/displaylocusrecord.cgi?id=65112	X57313	chr4	-1	GRMZM2G119071	2	Good	http://genomevolution.org/r/25pw	GRMZM2G553422	GRMZM2G401147	Sb07g022370	PAC:18187016	chr8:22231845-22466035	no synteny	http://genomevolution.org/r/25px	No Gene Identified by Maizesequence.org	NA
hsk1	3	high-sulfur keratin homolog1		http://www.maizegdb.org/cgi-bin/displaylocusrecord.cgi?id=64561	T14673	chr9	-1	GRMZM5G844723	2	Can't proof	http://genomevolution.org/r/260g		too big a gap	chr1:58795354-59707921	chr1:43070226-43850689	chr3:12522642-13228664	chr1:61561193-62320099	http://genomevolution.org/r/26ed	No Gene Identified by Maizesequence.org	NA
hsp101	3	heat-shock protein 101		http://www.maizegdb.org/cgi-bin/displaylocusrecord.cgi?id=652094	AF077337	chr6	1	GRMZM2G360681	1	Good	http://genomevolution.org/r/25xd		chr8:123801667-124274400	Sb09g025900	PAC:18168555	Os05g44340	Bradi2g19540	http://genomevolution.org/r/26il	GRMZM2G360681	Identical Assignment
igl1	3	indole-3-glycerol phosphate lyase1		http://www.maizegdb.org/cgi-bin/displaylocusrecord.cgi?id=934735	NM_001111532	chr1	-1	GRMZM2G046191	1	Assignment corrected by maizesequence.org									GRMZM2G046191	Different Assignment	http://genomevolution.org/r/26k0	The original GenBank record we used (U82201) was incorrect. Using NM_001111532	our identification now agrees with maizesequence.orgs
kch2	3	potassium channel2		http://www.maizegdb.org/cgi-bin/displaylocusrecord.cgi?id=958832	AJ132686	chr8	1	AC234152.1_FG007-AC234152.1_FG002	2	Gene split by maizesequence.org	http://genomevolution.org/r/25cg		too big a gap	Sb09g021210	too big a gap	chr5:20322584-21033855	Bradi2g24450	http://genomevolution.org/r/262u	No Gene Identified by Maizesequence.org	NA
kch3	3	potassium channel3		http://www.maizegdb.org/cgi-bin/displaylocusrecord.cgi?id=975928	AY461584	chr4	1	GRMZM2G081666	2	Good	http://genomevolution.org/r/25ks		GRMZM2G178356	Sb04g008780	PAC:18172433	Os02g14840	Bradi3g09290	http://genomevolution.org/r/26gb	GRMZM2G081666	Identical Assignment
lpa1	3	low phytic acid1		http://www.maizegdb.org/cgi-bin/displaylocusrecord.cgi?id=242403	AF323175	chr1	1	GRMZM2G155242	1	Good	http://genomevolution.org/r/25t3		GRMZM2G004528	Sb01g044290	PAC:18192344	Os03g09250	Bradi1g71670	http://genomevolution.org/r/25t4	GRMZM2G155242	Identical Assignment
lpa2	3	low phytic acid2		http://www.maizegdb.org/cgi-bin/displaylocusrecord.cgi?id=301214	AY172635	chr1	-1	GRMZM2G456626	1	Good	http://genomevolution.org/r/25z7		chr5:44106687-44456229	Sb01g028090	PAC:18195322	Os10g42550	Bradi3g34350	http://genomevolution.org/r/26dt	GRMZM2G456626	Identical Assignment
mads1	3	MADS1		http://www.maizegdb.org/cgi-bin/displaylocusrecord.cgi?id=617663	AF112148	chr9	1	GRMZM2G171365	2	Good	http://genomevolution.org/r/25ux		GRMZM2G026223	Sb01g049020	PAC:18195918	Os03g03100	Bradi1g77020	http://genomevolution.org/r/25uy	GRMZM2G171365	Identical Assignment
meg1	3	maternally expressed gene1		http://www.maizegdb.org/cgi-bin/displaylocusrecord.cgi?id=894726	AY536120	chr7	1	GRMZM2G354335	1	Maizesequence.org adds to extra exons	http://genomevolution.org/r/25x7	GRMZM2G116212||GRMZM2G137959||GRMZM2G145466||GRMZM2G175896||GRMZM2G175912||GRMZM2G181051||GRMZM2G573952||GRMZM2G573956	no synteny	too big a gap	chr2:5621305-6247358	chr7:4506584-4989949	chr1:53134436-53575698	http://genomevolution.org/r/26cu	No Gene Identified by Maizesequence.org	NA
mir1	3	maize insect resistance1		http://www.maizegdb.org/cgi-bin/displaylocusrecord.cgi?id=116182	AF019145	chr6	-1	GRMZM2G150276	2	Good	http://genomevolution.org/r/25sb	GRMZM2G150256	too big a gap	Sb10g027980	too big a gap	chr6:28229592-28756822	chr1:28110523-29020642	http://genomevolution.org/r/26ag	No Gene Identified by Maizesequence.org	NA
mrpa3	3	multidrug resistance-associated protein3		http://www.maizegdb.org/cgi-bin/displaylocusrecord.cgi?id=9019766	AY609318	chr9	1	GRMZM2G111903	1	Good	http://genomevolution.org/r/25ou		chr6:76633488-76863259	Sb10g004070	PAC:18196968	Os06g06440	Bradi1g48700	http://genomevolution.org/r/25ov	No Gene Identified by Maizesequence.org	NA
myb2	3	myb2		http://www.maizegdb.org/cgi-bin/displaylocusrecord.cgi?id=115996	AF458962	chr3	1	AC203535.4_FG001	1	Good	http://genomevolution.org/r/25bu	GRMZM5G826686||GRMZM5G882384	too big a gap	Sb03g044450	chr3:43681517-44108333	chr1:40516492-40965296	chr2:56751927-57123741	http://genomevolution.org/r/26ex	GRMZM2G081557	Different Assignment	http://genomevolution.org/r/26jd	Two independent GenBank Records for myb2 hit the gene we identified as myb. Neither shows any similarity to gene identified by maizesequence.org. The maizesequence.org gene is located on chr10 but myb2 is located on chr3 according to maizegdb locus page.
ocl1	3	outer cell layer1		http://www.maizegdb.org/cgi-bin/displaylocusrecord.cgi?id=223027	Y17898	chr3	1	GRMZM2G026643	1	Good	http://genomevolution.org/r/25g2		chr8:8809046-9953073	Sb03g008090	PAC:18176511	no synteny	no synteny	http://genomevolution.org/r/25g3	No Gene Identified by Maizesequence.org	NA
p2	3	pericarp color2	Y	http://www.maizegdb.org/cgi-bin/displaylocusrecord.cgi?id=484812	AF210617	chr1	1	GRMZM2G057027	1	duplicate of P1	http://genomevolution.org/r/25la		GRMZM2G022686	Sb01g037690	PAC:18191887	Os03g19120	Bradi1g64140	http://genomevolution.org/r/2670	No Gene Identified by Maizesequence.org	NA
pcna1	3	proliferating cell nuclear antigen1		http://www.maizegdb.org/cgi-bin/displaylocusrecord.cgi?id=113517	X79065	chr5	1	GRMZM2G030523	1	Good	http://genomevolution.org/r/25ge		GRMZM2G108712	Sb04g036440	PAC:18174009	Os02g56130	Bradi3g54630	http://genomevolution.org/r/25gf	GRMZM2G030523	Identical Assignment
pdc2	3	pyruvate decarboxylase2		http://www.maizegdb.org/cgi-bin/displaylocusrecord.cgi?id=25424	D14456	chr8	-1	GRMZM2G038821	2	Good	http://genomevolution.org/r/25h8		chr3:14813273-14979702	Sb03g005240	PAC:18179749	Os01g06660	Bradi2g03840	http://genomevolution.org/r/25h9	GRMZM2G038821	Identical Assignment
pdc3	3	pyruvate decarboxylase3		http://www.maizegdb.org/cgi-bin/displaylocusrecord.cgi?id=25425	D14457	chr1	-1	GRMZM2G087186	1	Good	http://genomevolution.org/r/25lu	GRMZM5G841025	chr9:137362417-137474944	Sb01g038360	PAC:18193994	Os03g18220	Bradi1g65440	http://genomevolution.org/r/26gk	GRMZM2G087186	Identical Assignment
pdi1	3	protein disulfide isomerase1		http://www.maizegdb.org/cgi-bin/displaylocusrecord.cgi?id=82183	AY739284	chr4	-1	GRMZM2G091481	1	Good	http://genomevolution.org/r/25mi	GRMZM2G393320	GRMZM2G163421	Sb05g006150	PAC:18201635	Os11g09280	too big a gap	http://genomevolution.org/r/26gp	No Gene Identified by Maizesequence.org	NA
pgl8	3	exopolygalacturonase8		http://www.maizegdb.org/cgi-bin/displaylocusrecord.cgi?id=66201	X64408	chr6	-1	GRMZM2G394259	2	Good	http://genomevolution.org/r/25xx		chr9:101722909-102205276	Sb10g024010	too big a gap	Os06g40890	Bradi1g36100	http://genomevolution.org/r/26d7	No Gene Identified by Maizesequence.org	NA
phot1	3	blue-light receptor phototropin 1		http://www.maizegdb.org/cgi-bin/displaylocusrecord.cgi?id=199156	AF033263	chr3	1	GRMZM2G001457	2	Good	http://genomevolution.org/r/25cw		no synteny	Sb08g000260	PAC:18189258	Os11g01140	Bradi4g45310	http://genomevolution.org/r/25cx	No Gene Identified by Maizesequence.org	NA
phyB1	3	phytochromeB1		http://www.maizegdb.org/cgi-bin/displaylocusrecord.cgi?id=30051	DQ307579	chr1	1	GRMZM2G124532	1	maizesequence.org CDS starts too late (insertion into B73 exon?)	http://genomevolution.org/r/25qg		GRMZM2G092174	Sb01g037340	PAC:18193872	Os03g19590	Bradi1g64360	http://genomevolution.org/r/25qh	No Gene Identified by Maizesequence.org	NA
piip1	3	physical impedance induced protein1		http://www.maizegdb.org/cgi-bin/displaylocusrecord.cgi?id=411266	AF001634	chr9	1	AC234161.1_FG001	2	Good	http://genomevolution.org/r/25ck	AC234161.1_FG002	GRMZM2G094639	Sb01g029630	PAC:18194443	Os10g40420	Bradi3g32930	http://genomevolution.org/r/25cl	No Gene Identified by Maizesequence.org	NA
pip1e	3	plasma membrane intrinsic protein1		http://www.maizegdb.org/cgi-bin/displaylocusrecord.cgi?id=403369	AF326489	chr4	-1	GRMZM2G081843	2	Good	http://genomevolution.org/r/25ku		chr5:216261406-216432880	Sb04g037800	PAC:18174589	Os02g57720	Bradi3g56020	http://genomevolution.org/r/25kv	GRMZM2G081843	Identical Assignment
pip1f	3	plasma membrane intrinsic protein1		http://www.maizegdb.org/cgi-bin/displaylocusrecord.cgi?id=403372	AF326490	chr9	1	GRMZM2G136032	1	Good	http://genomevolution.org/r/25r4		chr6:111097042-111816952	Sb10g007610	PAC:18199627	chr6:5814961-6206831	chr1:43860799-44292265	http://genomevolution.org/r/26hj	GRMZM2G136032	Identical Assignment
pip2b	3	plasma membrane intrinsic protein2		http://www.maizegdb.org/cgi-bin/displaylocusrecord.cgi?id=403378	AF326492	chr2	1	GRMZM2G092125	2	Good	http://genomevolution.org/r/25mo		GRMZM2G014914	Sb02g010760	too big a gap	too big a gap	Bradi1g28760	http://genomevolution.org/r/25mp	GRMZM2G092125	Identical Assignment
pip2c	3	plasma membrane intrinsic protein2		http://www.maizegdb.org/cgi-bin/displaylocusrecord.cgi?id=403381	AF326493	chr4	1	GRMZM2G081192	2	Good	http://genomevolution.org/r/25ko	GRMZM2G081333	GRMZM2G178706	Sb04g026650	PAC:18173785	Os02g41860	Bradi3g49360	http://genomevolution.org/r/25kp	GRMZM2G081192	Identical Assignment
pip2d	3	plasma membrane intrinsic protein2		http://www.maizegdb.org/cgi-bin/displaylocusrecord.cgi?id=403384	AF326494	chr5	1	GRMZM2G154628	1	Good	http://genomevolution.org/r/25sv		chr4:154959920-155345379	Sb04g032430	PAC:18170819	Os02g44630	Bradi3g51390	http://genomevolution.org/r/26aq	GRMZM2G154628	Identical Assignment
pip2e	3	plasma membrane intrinsic protein2		http://www.maizegdb.org/cgi-bin/displaylocusrecord.cgi?id=403375	AF326491	chr7	-1	GRMZM2G014914	1	Good	http://genomevolution.org/r/25eg	GRMZM2G047368	GRMZM2G092125	Sb02g010760	PAC:18181054	too big a gap	Bradi1g28760	http://genomevolution.org/r/25eh	No Gene Identified by Maizesequence.org	NA
pip2f	3	plasma membrane intrinsic protein2		http://www.maizegdb.org/cgi-bin/displaylocusrecord.cgi?id=403387	AF326495	chr7	-1	GRMZM2G047368	1	Good	http://genomevolution.org/r/25hs		GRMZM2G014914	too big a gap	PAC:18181068	too big a gap	Bradi1g28760	http://genomevolution.org/r/265c	No Gene Identified by Maizesequence.org	NA
pk4	3	protein kinase4		http://www.maizegdb.org/cgi-bin/displaylocusrecord.cgi?id=306170	AF141378	chr3	1	GRMZM2G014833	1	Good	http://genomevolution.org/r/25ee		GRMZM2G136400	Sb03g035170	PAC:18179149	Os01g55450	Bradi2g50440	http://genomevolution.org/r/25ef	No Gene Identified by Maizesequence.org	NA
pki1	3	protein kinase inhibitor1		http://www.maizegdb.org/cgi-bin/displaylocusrecord.cgi?id=104301	Z29643	chr1	-1	GRMZM2G018728	1	Good	http://genomevolution.org/r/25fa		chr9:133645407-133748115	Sb01g036830	PAC:18195393	Os03g20630	Bradi1g63860	http://genomevolution.org/r/25fb	No Gene Identified by Maizesequence.org	NA
pmg1	3	phosphoglycerate mutase1		http://www.maizegdb.org/cgi-bin/displaylocusrecord.cgi?id=25939	Z33612	chr8	-1	GRMZM5G833389	2	Good	http://genomevolution.org/r/2600		GRMZM2G003385	Sb03g038020	PAC:18176072	Os01g60190	Bradi2g53340	http://genomevolution.org/r/2601	No Gene Identified by Maizesequence.org	NA
prf1	3	profilin homolog1		http://www.maizegdb.org/cgi-bin/displaylocusrecord.cgi?id=51449	X73279	chr6	1	GRMZM2G074361	1	Good	http://genomevolution.org/r/25k6		GRMZM2G109842	Sb09g026120	PAC:18168727	chr5:25962071-26565743	Bradi2g19360	http://genomevolution.org/r/26g7	GRMZM2G074361	Identical Assignment
qm1	3	QM1 homolog1		http://www.maizegdb.org/cgi-bin/displaylocusrecord.cgi?id=77936	U06108	chr5	-1	GRMZM2G087233	2	Good	http://genomevolution.org/r/25lw		GRMZM2G027451	Sb01g015470	chr1:12141774-13209266	no synteny	chr1:12210976-12768966	http://genomevolution.org/r/26gl	GRMZM2G087233	Identical Assignment
rbap1	3	WD-repeat protein RBAP1		http://www.maizegdb.org/cgi-bin/displaylocusrecord.cgi?id=452219	AF250047	chr8	1	GRMZM2G316113	2	Good	http://genomevolution.org/r/25w7		GRMZM2G137965	Sb03g032630	PAC:18179604	Os01g51300	Bradi2g47940	http://genomevolution.org/r/25w8	No Gene Identified by Maizesequence.org	NA
ris2	3	iron-sulfur protein2		http://www.maizegdb.org/cgi-bin/displaylocusrecord.cgi?id=66387	W49887		-1	GRMZM2G162748	1	Can't proof	http://genomevolution.org/r/25tz	GRMZM2G162805	GRMZM2G038365	chr4:10212873-10952629	PAC:18172396	Os02g15560	no synteny	http://genomevolution.org/r/26i0	No Gene Identified by Maizesequence.org	NA
rpl17	3	ribosomal protein L17		http://www.maizegdb.org/cgi-bin/displaylocusrecord.cgi?id=82182	AF034948	chr4	-1	GRMZM2G702426	2	Good	http://genomevolution.org/r/25zp		GRMZM2G148744	Sb07g026305	PAC:18186773	Os08g41810	Bradi3g41150	http://genomevolution.org/r/25zq	GRMZM2G702426	Identical Assignment
rpot1	3	RNA polymerase T phage-like 1		http://www.maizegdb.org/cgi-bin/displaylocusrecord.cgi?id=165004	AF127021	chr7	1	GRMZM2G381395	1	Good	http://genomevolution.org/r/25xp		chr2:211722035-211948803	Sb02g039520	chr2:43060846-43660824	chr7:25585675-26175382	chr1:16357976-17102850	http://genomevolution.org/r/26in	No Gene Identified by Maizesequence.org	NA
rps11	3	ribosomal protein S11		http://www.maizegdb.org/cgi-bin/displaylocusrecord.cgi?id=24949	X55967	chr10	1	GRMZM2G019325	2	Good	http://genomevolution.org/r/25fc		GRMZM2G044800	Sb06g028330	PAC:18205505	Os04g52354	Bradi5g21630	http://genomevolution.org/r/26fh	GRMZM2G044800	Different Assignment	http://genomevolution.org/r/26jj	Two independent GenBank records for rps11 both map better to the gene we identified than the gene identified by maizesequence.org. Our gene's chromosomal location agrees with genetic location of rps11 on the maizegdb locus page. The location of the maizesequence.org gene does not.
rps4	3	ribosomal protein S4		http://www.maizegdb.org/cgi-bin/displaylocusrecord.cgi?id=99754	AF015522	chr1	-1	GRMZM2G035017	1	Good	http://genomevolution.org/r/25gq		GRMZM2G125271	Sb01g001850	chr1:610224-1022695	chr3:35199453-35652824	chr1:1055737-1604152	http://genomevolution.org/r/264u	GRMZM2G035017	Identical Assignment
sar1	3	SAR homolog1		http://www.maizegdb.org/cgi-bin/displaylocusrecord.cgi?id=63952	T14655	chr3	1	GRMZM2G038356	1	Good	http://genomevolution.org/r/25h4		GRMZM2G086636	Sb03g013550	PAC:18178788	Os01g23620	Bradi2g12510	http://genomevolution.org/r/25h5	No Gene Identified by Maizesequence.org	NA
spp1	3	sucrose-phosphatase1		http://www.maizegdb.org/cgi-bin/displaylocusrecord.cgi?id=403254	AF283564	chr8	-1	GRMZM2G055489	2	Good	http://genomevolution.org/r/25i8		chr6:151506683-152515688	chr9:52109989-52638612	chr9:20398414-21095532	chr5:22388038-22888762	chr2:20216394-20993991	http://genomevolution.org/r/265k	GRMZM2G055489	Identical Assignment
sps1	3	sucrose phosphate synthase1		http://www.maizegdb.org/cgi-bin/displaylocusrecord.cgi?id=25299	M97550	chr8	1	GRMZM5G875238	2	Good	http://genomevolution.org/r/260u		GRMZM2G140107	Sb03g043900	PAC:18178909	Os01g69030	Bradi2g58860	http://genomevolution.org/r/260v	No Gene Identified by Maizesequence.org	NA
ss1	3	starch synthase I		http://www.maizegdb.org/cgi-bin/displaylocusrecord.cgi?id=935314	AF036891	chr9	1	GRMZM2G129451	1	Good	http://genomevolution.org/r/25qo		chr6:76952255-77196334	Sb10g004160	PAC:18197065	Os06g06560	Bradi1g48610	http://genomevolution.org/r/26hf	GRMZM2G129451	Identical Assignment
taf1	3	transcription associated factor1		http://www.maizegdb.org/cgi-bin/displaylocusrecord.cgi?id=64935	T12672	chr3	1	GRMZM2G002276	1	Can't proof	http://genomevolution.org/r/25cy		GRMZM2G149230	Sb03g039720	PAC:18177060	Os01g62820	Bradi2g54860	http://genomevolution.org/r/25cz	No Gene Identified by Maizesequence.org	NA
tif1	3	translation initiation factor1		http://www.maizegdb.org/cgi-bin/displaylocusrecord.cgi?id=81996	AF034944	chr7	-1	GRMZM5G835323	1	Good	http://genomevolution.org/r/2604		chr2:203725214-203894272	Sb02g035170	PAC:18181078	Os07g34589	Bradi1g25840	http://genomevolution.org/r/26j3	GRMZM5G835323	Identical Assignment
tlk2	3	tousled-like protein kinase2		http://www.maizegdb.org/cgi-bin/displaylocusrecord.cgi?id=113397	AF012889	chr5	1	GRMZM2G172132	2	Can't proof	http://genomevolution.org/r/25v1		GRMZM2G016671	Sb01g008020	PAC:18191278	Os03g53880	Bradi1g08540	http://genomevolution.org/r/25v2	GRMZM2G172132	Identical Assignment
trh1	3	thioredoxin h homolog1		http://www.maizegdb.org/cgi-bin/displaylocusrecord.cgi?id=82374	T15273	chr6	1	GRMZM2G424053	1	Good	http://genomevolution.org/r/25yr		chr8:122374111-122477585	Sb09g024960	PAC:18169992	chr5:25057494-25544351	Bradi2g20440	http://genomevolution.org/r/26iw	GRMZM2G079089	Different Assignment	http://genomevolution.org/r/26k3	Two independent GenBank records for trh1 both hit the gene we identified and not the gene identified by maizesequence.org. Our gene agrees with the genetic location recorded by maizegdb	maizesequence.org's does not.
uce1	3	ubiquitin conjugating enzyme1		http://www.maizegdb.org/cgi-bin/displaylocusrecord.cgi?id=64558	T18767	chr3	-1	GRMZM2G018447	2	Good	http://genomevolution.org/r/25f6		GRMZM2G007381	Sb08g022990	PAC:18189596	Os12g44000	Bradi4g00660	http://genomevolution.org/r/25f7	No Gene Identified by Maizesequence.org	NA
vacs1	3	vacuolar sorting receptor homolog1		http://www.maizegdb.org/cgi-bin/displaylocusrecord.cgi?id=82419	AY105262	chr9	-1	GRMZM2G067546	2	Good	http://genomevolution.org/r/25ji		GRMZM2G049211	Sb01g036170	PAC:18194385	Os03g21720	Bradi1g63210	http://genomevolution.org/r/25jj	No Gene Identified by Maizesequence.org	NA
yab10	3	yabby homolog10		http://www.maizegdb.org/cgi-bin/displaylocusrecord.cgi?id=9018046	AY313904	chr1	1	GRMZM2G167824	1	Good	http://genomevolution.org/r/25uh		GRMZM2G074543	Sb01g017560	PAC:18190942	Os10g36420	Bradi3g30410	http://genomevolution.org/r/25ui	No Gene Identified by Maizesequence.org	NA
ypt1	3	ypt homolog1		http://www.maizegdb.org/cgi-bin/displaylocusrecord.cgi?id=25949	X63277	chr2	-1	GRMZM2G086971	1	Good	http://genomevolution.org/r/25lq		chr10:118938037-119075100	Sb06g017640	PAC:18205317	chr4:21509416-21975014	Bradi5g11290	http://genomevolution.org/r/26gj	GRMZM2G086971	Identical Assignment
zfl1	3	zea floricaula/leafy1		http://www.maizegdb.org/cgi-bin/displaylocusrecord.cgi?id=41309	AY179882	chr10	1	GRMZM2G098813	2	Good	http://genomevolution.org/r/25ng		GRMZM2G180190	Sb06g027340	PAC:18205732	Os04g51000	Bradi5g20340	http://genomevolution.org/r/25nh	No Gene Identified by Maizesequence.org	NA
zmm24	3	Zea mays MADS24		http://www.maizegdb.org/cgi-bin/displaylocusrecord.cgi?id=897700	AJ430638	chr1	-1	GRMZM2G087095	1	Good	http://genomevolution.org/r/25ls	GRMZM2G032339	GRMZM2G032339	Sb01g007790	PAC:18191766	Os03g54160	Bradi1g08340	http://genomevolution.org/r/2678	No Gene Identified by Maizesequence.org	NA
znf1	3	zinc finger protein1		http://www.maizegdb.org/cgi-bin/displaylocusrecord.cgi?id=118874	W99253		-1	GRMZM5G836222	1	Good	http://genomevolution.org/r/2606	GRMZM5G803160	chr6:98575494-98877012	Sb10g024060	too big a gap	Os06g41010	Bradi1g36050	http://genomevolution.org/r/2607	No Gene Identified by Maizesequence.org	NA
brk1	2	brick1	Y	http://www.maizegdb.org/cgi-bin/displaylocusrecord.cgi?id=854977	AY093614	chr5	-1	GRMZM5G842058	1	Good	http://genomevolution.org/r/260c		chr4:168939015-169058991	Sb04g038300	PAC:18171162	Os02g58320	too big a gap	http://genomevolution.org/r/26j5	GRMZM5G842058	Identical Assignment
cdj2	2	chaperone DNA J2		http://www.maizegdb.org/cgi-bin/displaylocusrecord.cgi?id=57224	AF053468	chr1	-1	GRMZM2G364069	1	Good	http://genomevolution.org/r/25xf		GRMZM2G134980	Sb01g013390	PAC:18196410	Os03g44620	Bradi1g13640	http://genomevolution.org/r/25xg	No Gene Identified by Maizesequence.org	NA
csy1	2	chloroplast SecY-1		http://www.maizegdb.org/cgi-bin/displaylocusrecord.cgi?id=115188	AF039304	chr10	-1	GRMZM5G809546	NA	Good	http://genomevolution.org/r/25zt		too big a gap	no synteny	no synteny	no synteny	no synteny	http://genomevolution.org/r/25zu	GRMZM5G809546	Identical Assignment
dcd1	2	discordia1	Y	http://www.maizegdb.org/cgi-bin/displaylocusrecord.cgi?id=274903	FJ469780	chr10	1	GRMZM2G083459	1	Good	http://genomevolution.org/r/25l0		GRMZM2G120178	Sb09g003830	no synteny	Os05g05710	Bradi2g35810	http://genomevolution.org/r/25l1	No Gene Identified by Maizesequence.org	NA
ea1	2	egg apparatus1		http://www.maizegdb.org/cgi-bin/displaylocusrecord.cgi?id=936188	AY733074	chr7	-1	GRMZM2G456746	1	Good	http://genomevolution.org/r/25z9		chr2:210338833-210443725	Sb02g038820	PAC:18180767	Os07g41400	Bradi1g21940	http://genomevolution.org/r/26du	No Gene Identified by Maizesequence.org	NA
gol1	2	goliath1	Y	http://www.maizegdb.org/cgi-bin/displaylocusrecord.cgi?id=82001	T18797.1	chr4	-1	GRMZM2G080079	2	Can't proof	http://genomevolution.org/r/2615		GRMZM2G140651	Sb04g028130	PAC:18172421	Os02g50990	Bradi3g59500	http://genomevolution.org/r/2616	No Gene Identified by Maizesequence.org	NA
hir1	2	hypersensitive induced reaction1		http://www.maizegdb.org/cgi-bin/displaylocusrecord.cgi?id=309368	AF236373	chr4	1	GRMZM2G117755	2	Good	http://genomevolution.org/r/25po		chr1:216825131-217090405	Sb07g019760	PAC:18186665	Os08g30790	Bradi3g35370	http://genomevolution.org/r/25pp	GRMZM2G117755	Identical Assignment
hopi1	2	hopi r1/b1 family member1		http://www.maizegdb.org/cgi-bin/displaylocusrecord.cgi?id=275316	AJ251719	chr10	1	GRMZM5G822829	2	Good|lc1	http://genomevolution.org/r/25zz		GRMZM2G172795	Sb06g025060	PAC:18202973	Os04g47059	chr5:20758637-21209681	http://genomevolution.org/r/26j2	No Gene Identified by Maizesequence.org	NA
hsbp1	2	herbicide safener binding protein1		http://www.maizegdb.org/cgi-bin/displaylocusrecord.cgi?id=273025	AF033496	chr2	-1	GRMZM2G085924		Good	http://genomevolution.org/r/25lk	GRMZM2G385313||GRMZM2G506270	no synteny	no synteny	no synteny	no synteny	no synteny	http://genomevolution.org/r/25ll	No Gene Identified by Maizesequence.org	NA
incw3	2	invertase cell wall3		http://www.maizegdb.org/cgi-bin/displaylocusrecord.cgi?id=194081	AF043346	chr10	1	GRMZM2G123633	2	Good	http://genomevolution.org/r/25qc	GRMZM2G095725	GRMZM2G095725	too big a gap	PAC:18203366	Os04g33740	Bradi5g09450	http://genomevolution.org/r/269h	No Gene Identified by Maizesequence.org	NA
lem1	2	lethal embryo mutant1		http://www.maizegdb.org/cgi-bin/displaylocusrecord.cgi?id=917245	AF332374	chr1	-1	AC234157.1_FG002	1	Good	http://genomevolution.org/r/25ci		GRMZM2G137829	Sb01g006910	PAC:18192774	Os03g55930	Bradi1g07370	http://genomevolution.org/r/25cj	AC234157.1_FG002	Identical Assignment
lyce1	2	lycopene epsilon cyclase1		http://www.maizegdb.org/cgi-bin/displaylocusrecord.cgi?id=1219919	EU924262	chr8	1	GRMZM2G012966	2	Good	http://genomevolution.org/r/25e4		GRMZM2G070923	Sb03g026020	PAC:18176860	Os01g39960	Bradi2g41890	http://genomevolution.org/r/26f8	No Gene Identified by Maizesequence.org	NA
mez1	2	enhancer of zeste1		http://www.maizegdb.org/cgi-bin/displaylocusrecord.cgi?id=754841	AF443596	chr6	-1	GRMZM2G157820	2	Good	http://genomevolution.org/r/25tl		chr9:16202997-16340595	Sb10g004560	PAC:18199180	too big a gap	Bradi1g48340	http://genomevolution.org/r/26hw	No Gene Identified by Maizesequence.org	NA
ms26	2	male sterile26		http://www.maizegdb.org/cgi-bin/displaylocusrecord.cgi?id=113518	AF366297	chr1	-1	GRMZM2G091822	1	Good	http://genomevolution.org/r/25mk		too big a gap	Sb01g045960	PAC:18195337	Os03g07250	Bradi1g73800	http://genomevolution.org/r/26gq	No Gene Identified by Maizesequence.org	NA
mwp1	2	milkweed pod1	Y	http://www.maizegdb.org/cgi-bin/displaylocusrecord.cgi?id=969623	EU925398	chr7	-1	GRMZM2G082264	1	Good	http://genomevolution.org/r/25kw		chr2:178831468-179061219	Sb02g024110	PAC:18184148	Os09g23200	Bradi4g29700	http://genomevolution.org/r/26gc	GRMZM2G082264	Identical Assignment
ocl2	2	outer cell layer2		http://www.maizegdb.org/cgi-bin/displaylocusrecord.cgi?id=314435	AJ250984	chr10	1	AC235534.1_FG007	2	Good	http://genomevolution.org/r/25cm		chr2:16627802-16836331	Sb06g025750	PAC:18204432	Os04g48070	Bradi5g18720	http://genomevolution.org/r/25cn	No Gene Identified by Maizesequence.org	NA
ocl3	2	outer cell layer3		http://www.maizegdb.org/cgi-bin/displaylocusrecord.cgi?id=314444	AJ250985	chr7	1	GRMZM2G116658	1	Good	http://genomevolution.org/r/25pg		chr2:194750978-194957777	Sb02g030470	PAC:18184935	Os09g35760	Bradi4g35760	http://genomevolution.org/r/26h8	No Gene Identified by Maizesequence.org	NA
ocl5a	2	outer cell layer5a		http://www.maizegdb.org/cgi-bin/displaylocusrecord.cgi?id=314451	AJ250987	chr4	-1	GRMZM2G130442	2	Good	http://genomevolution.org/r/25qs		GRMZM2G118063	Sb07g005180	PAC:18186881	Os08g08820	Bradi3g15330	http://genomevolution.org/r/25qt	No Gene Identified by Maizesequence.org	NA
pac1	2	pale aleurone color1	Y	http://www.maizegdb.org/cgi-bin/displaylocusrecord.cgi?id=871231	AY115485	chr5	-1	GRMZM2G058292	1	Good|maizesequence.org includes more 5' UTR	http://genomevolution.org/r/25im	GRMZM5G872691	chr4:156037502-156392391	Sb04g031730	chr4:31805659-32250049	Os02g45810	Bradi3g51820	http://genomevolution.org/r/26g0	GRMZM2G058432	Different Assignment	http://genomevolution.org/r/26jr	Maizesequence.org identified the gene immediately upstream of the gene we identified as pac1. Annotated exons of the original GenBank sequence	as well as the sequence of a second independent record support our assignment over that of maizesequence.org
phyB2	2	phytochromeB2		http://www.maizegdb.org/cgi-bin/displaylocusrecord.cgi?id=41105	AY234828	chr9	-1	GRMZM2G092174	2	Good	http://genomevolution.org/r/25mq		GRMZM2G124532	Sb01g037340	PAC:18193872	Os03g19590	Bradi1g64360	http://genomevolution.org/r/25mr	No Gene Identified by Maizesequence.org	NA
rel2	2	ramosa1 enhancer locus2	Y	http://www.maizegdb.org/cgi-bin/displaylocusrecord.cgi?id=2365883	GQ927145	chr10	-1	GRMZM2G042992	1	Good	http://genomevolution.org/r/2619		GRMZM2G124115	Sb07g004180	PAC:18187322	Os08g06480	Bradi3g16250	http://genomevolution.org/r/261a	No Gene Identified by Maizesequence.org	NA
rmr1	2	required to maintain repression1	Y	http://www.maizegdb.org/cgi-bin/displaylocusrecord.cgi?id=175395	EU155001	chr6	1	GRMZM2G154946	1	Good	http://genomevolution.org/r/25sx	GRMZM2G453655	chr8:114358850-114478808	Sb09g019410	PAC:18167972	Os05g32610	Bradi2g26500	http://genomevolution.org/r/25sy	No Gene Identified by Maizesequence.org	NA
scm1	2	self-colored marbled1		http://www.maizegdb.org/cgi-bin/displaylocusrecord.cgi?id=250563	AF135458	chr10	1	GRMZM5G822829	2	can't proof|lc1	http://genomevolution.org/r/25zy		GRMZM2G172795	Sb06g025060	PAC:18202973	Os04g47059	chr5:20758637-21209681	http://genomevolution.org/r/26j2	No Gene Identified by Maizesequence.org	NA
sgo1	2	shugoshin centromeric cohesion1		http://www.maizegdb.org/cgi-bin/displaylocusrecord.cgi?id=870601	AY964185	chr7	-1	GRMZM2G074082	1	Good	http://genomevolution.org/r/25k4		chr2:161225247-161399041	Sb02g006220	PAC:18180893	too big a gap	chr1:52201553-52712348	http://genomevolution.org/r/26g6	GRMZM2G074082	Identical Assignment
vp15	2	viviparous15	Y	http://www.maizegdb.org/cgi-bin/displaylocusrecord.cgi?id=9018083	DQ273133	chr5	-1	GRMZM2G121468	1	Good	http://genomevolution.org/r/25q6	GRMZM2G421883	GRMZM5G835259	Sb04g022920	PAC:18173199	Os02g35200	Bradi3g45980	http://genomevolution.org/r/25q7	No Gene Identified by Maizesequence.org	NA
why1	2	whirly1	Y	http://www.maizegdb.org/cgi-bin/displaylocusrecord.cgi?id=1232893	EU595664	chr6	-1	GRMZM2G155662	2	Good	http://genomevolution.org/r/25t7		chr9:19882476-20163439	Sb10g003170	no synteny	no synteny	no synteny	http://genomevolution.org/r/25t8	No Gene Identified by Maizesequence.org	NA
wtf1	2	what's this factor?1		http://www.maizegdb.org/cgi-bin/displaylocusrecord.cgi?id=1232891	FJ264201	chr8	1	GRMZM2G403797	2	Good	http://genomevolution.org/r/25yb		chr6:165347972-165536514	Sb09g029040	PAC:18170064	Os05g49610	Bradi2g15890	http://genomevolution.org/r/26is	No Gene Identified by Maizesequence.org	NA
xyl1	2	xylanase1		http://www.maizegdb.org/cgi-bin/displaylocusrecord.cgi?id=403543	AF063865	chr1	1	GRMZM2G170839		Good	http://genomevolution.org/r/25uv		chr9:66508733-67593699	no synteny	no synteny	no synteny	no synteny	http://genomevolution.org/r/26bp	No Gene Identified by Maizesequence.org	NA
yab14	2	yabby14		http://www.maizegdb.org/cgi-bin/displaylocusrecord.cgi?id=9018047	AY313901	chr10	-1	GRMZM2G005353	2	Good	http://genomevolution.org/r/25dc		GRMZM2G054795	Sb06g023770	PAC:18203625	Os04g45330	Bradi5g16910	http://genomevolution.org/r/25dd	No Gene Identified by Maizesequence.org	NA
yab15	2	yabby15		http://www.maizegdb.org/cgi-bin/displaylocusrecord.cgi?id=904576	AY313902	chr5	1	GRMZM2G529859	1	Good	http://genomevolution.org/r/25zf		chr4:148375754-148648991	Sb04g033590	PAC:18172498	Os02g42950	Bradi3g50050	http://genomevolution.org/r/26j0	No Gene Identified by Maizesequence.org	NA
yab9	2	yabby9		http://www.maizegdb.org/cgi-bin/displaylocusrecord.cgi?id=9018048	AY313903	chr5	1	GRMZM2G074543	2	Good	http://genomevolution.org/r/25k8		GRMZM2G167824	Sb01g017560	PAC:18190942	Os10g36420	Bradi3g30410	http://genomevolution.org/r/25k9	No Gene Identified by Maizesequence.org	NA
zcn1	2	phosphatidylethanolamine-binding protein1		http://www.maizegdb.org/cgi-bin/displaylocusrecord.cgi?id=1203920	EU241917	chr3	-1	GRMZM2G092008	2	Good	http://genomevolution.org/r/25mm		GRMZM2G338454	Sb08g003210	PAC:18189088	Os12g05590	Bradi4g42400	http://genomevolution.org/r/25mn	No Gene Identified by Maizesequence.org	NA
zcn10	2	phosphatidylethanolamine-binding protein10		http://www.maizegdb.org/cgi-bin/displaylocusrecord.cgi?id=1203929	EU241926	chr3	-1	GRMZM2G152689	1	Good	http://genomevolution.org/r/25sl		GRMZM2G021614	Sb03g008270	PAC:18178661	Os01g02120	Bradi2g01020	http://genomevolution.org/r/25sm	No Gene Identified by Maizesequence.org	NA
zcn11	2	phosphatidylethanolamine-binding protein11		http://www.maizegdb.org/cgi-bin/displaylocusrecord.cgi?id=1203930	EU241927	chr6	1	GRMZM2G117057	2	Good	http://genomevolution.org/r/25pi		chr9:46016362-46437126	Sb10g013070	too big a gap	no synteny	Bradi1g42510	http://genomevolution.org/r/25pj	No Gene Identified by Maizesequence.org	NA
zcn12	2	phosphatidylethanolamine-binding protein12		http://www.maizegdb.org/cgi-bin/displaylocusrecord.cgi?id=1203931	EU241928	chr3	1	GRMZM2G103666	1	Good	http://genomevolution.org/r/25o2		chr8:174392704-174549773	Sb03g034580	PAC:18178710	Os01g54490	chr2:49523586-49858200	http://genomevolution.org/r/26gz	No Gene Identified by Maizesequence.org	NA
zcn13	2	phosphatidylethanolamine-binding protein13		http://www.maizegdb.org/cgi-bin/displaylocusrecord.cgi?id=1203932	EU241904	chr5	-1	GRMZM2G108016	1	Good	http://genomevolution.org/r/25oc		chr4:228399242-228975376	Sb04g008320	PAC:18171596	Os02g13830	Bradi3g08890	http://genomevolution.org/r/26h2	No Gene Identified by Maizesequence.org	NA
zcn14	2	phosphatidylethanolamine-binding protein14		http://www.maizegdb.org/cgi-bin/displaylocusrecord.cgi?id=1203933	EU241929	chr8	1	GRMZM2G373928	2	Maybe annotated as pseudogene?	http://genomevolution.org/r/25xl		chr3:3159974-3359907	Sb03g001700	too big a gap	Os01g11940	Bradi2g07070	http://genomevolution.org/r/26im	No Gene Identified by Maizesequence.org	NA
zcn15	2	phosphatidylethanolamine-binding protein15		http://www.maizegdb.org/cgi-bin/displaylocusrecord.cgi?id=1203934	EU241930	chr6	1	GRMZM2G051338	2	5' UTR unannotated by maizesequence.org	http://genomevolution.org/r/25hy		chr9:18268944-18380657	Sb10g003940	PAC:18197206	Os06g06320	Bradi1g48830	http://genomevolution.org/r/26fv	No Gene Identified by Maizesequence.org	NA
zcn16	2	phosphatidylethanolamine-binding protein16		http://www.maizegdb.org/cgi-bin/displaylocusrecord.cgi?id=1203935	EU241931	chr5	-1	GRMZM2G127121	1	Good	http://genomevolution.org/r/25qk		chr4:133272419-133506364	Sb04g025210	PAC:18171304	Os02g39064	chr3:49521145-50001099	http://genomevolution.org/r/26he	No Gene Identified by Maizesequence.org	NA
zcn17	2	phosphatidylethanolamine-binding protein17		http://www.maizegdb.org/cgi-bin/displaylocusrecord.cgi?id=1203936	EU241932	chr2	1	GRMZM2G075215	NA	Good	http://genomevolution.org/r/25ke		too big a gap	no synteny	no synteny	no synteny	no synteny	http://genomevolution.org/r/25kf	No Gene Identified by Maizesequence.org	NA
zcn18	2	phosphatidylethanolamine-binding protein18		http://www.maizegdb.org/cgi-bin/displaylocusrecord.cgi?id=1203937	EU241933	chr2	-1	GRMZM2G158809	2	Good	http://genomevolution.org/r/25tn		GRMZM2G440005	Sb02g029725	PAC:18183028	Os09g33850	Bradi4g35040	http://genomevolution.org/r/25to	No Gene Identified by Maizesequence.org	NA
zcn19	2	phosphatidylethanolamine-binding protein19		http://www.maizegdb.org/cgi-bin/displaylocusrecord.cgi?id=1203938	EU241934	chr10	1	GRMZM2G062052	2	Good	http://genomevolution.org/r/25j0		GRMZM2G021560	Sb06g020850	PAC:18205005	Os04g41130	Bradi5g14010	http://genomevolution.org/r/25j1	No Gene Identified by Maizesequence.org	NA
zcn2	2	phosphatidylethanolamine-binding protein2		http://www.maizegdb.org/cgi-bin/displaylocusrecord.cgi?id=1203921	EU241893	chr4	-1	GRMZM2G156079	2	Good	http://genomevolution.org/r/25t9		too big a gap	too big a gap	too big a gap	no synteny	too big a gap	http://genomevolution.org/r/25ta	No Gene Identified by Maizesequence.org	NA
zcn20	2	phosphatidylethanolamine-binding protein20		http://www.maizegdb.org/cgi-bin/displaylocusrecord.cgi?id=1203939	EU241935	chr10	-1	AC214791.2_FG002	1	3' UTR unannotated	http://genomevolution.org/r/25c6		chr3:98149258-98563013	Sb08g008180	PAC:18189902	no synteny	Bradi4g39730	http://genomevolution.org/r/26ez	No Gene Identified by Maizesequence.org	NA
zcn3	2	phosphatidylethanolamine-binding protein3		http://www.maizegdb.org/cgi-bin/displaylocusrecord.cgi?id=1203922	EU241919	chr10	-1	GRMZM2G338454	1	5' end of gene lost in a gap	http://genomevolution.org/r/25wt		GRMZM2G092008	Sb08g003210	PAC:18199896	Os12g05590	Bradi4g42400	http://genomevolution.org/r/25wu	No Gene Identified by Maizesequence.org	NA
zcn4	2	phosphatidylethanolamine-binding protein4		http://www.maizegdb.org/cgi-bin/displaylocusrecord.cgi?id=1203923	EU241920	chr2	1	GRMZM2G075081	1	Good	http://genomevolution.org/r/25kc		AC217051.3_FG006	Sb06g015490	PAC:18205441	Os04g33570	Bradi5g09270	http://genomevolution.org/r/25kd	No Gene Identified by Maizesequence.org	NA
zcn5	2	phosphatidylethanolamine-binding protein5		http://www.maizegdb.org/cgi-bin/displaylocusrecord.cgi?id=1203924	EU241921	chr10	-1	AC217051.3_FG006	2	Good	http://genomevolution.org/r/25c8		GRMZM2G075081	Sb06g015490	PAC:18205441	Os04g33570	Bradi5g09270	http://genomevolution.org/r/25c9	No Gene Identified by Maizesequence.org	NA
zcn6	2	phosphatidylethanolamine-binding protein6		http://www.maizegdb.org/cgi-bin/displaylocusrecord.cgi?id=1203925	EU241922	chr4	-1	GRMZM2G132880	1	Good	http://genomevolution.org/r/25qw		chr2:143622820-143831336	Sb05g003200	PAC:18199896	Os11g05470	no synteny	http://genomevolution.org/r/25qx	No Gene Identified by Maizesequence.org	NA
zcn7	2	phosphatidylethanolamine-binding protein7		http://www.maizegdb.org/cgi-bin/displaylocusrecord.cgi?id=1203926	EU241923	chr6	-1	GRMZM2G141756	1	Good	http://genomevolution.org/r/25rp		GRMZM2G179264	Sb09g025760	chr9:24878273-25379792	Os05g44180	Bradi2g19670	http://genomevolution.org/r/26hn	No Gene Identified by Maizesequence.org	NA
zcn8	2	phosphatidylethanolamine-binding protein8		http://www.maizegdb.org/cgi-bin/displaylocusrecord.cgi?id=1203927	EU241924	chr8	-1	GRMZM2G179264	2	Good	http://genomevolution.org/r/25vn		GRMZM2G141756	Sb09g025760	chr9:24868795-25552370	Os05g44180	Bradi2g19670	http://genomevolution.org/r/26ic	No Gene Identified by Maizesequence.org	NA
zcn9	2	phosphatidylethanolamine-binding protein9		http://www.maizegdb.org/cgi-bin/displaylocusrecord.cgi?id=1203928	EU241925	chr8	1	GRMZM2G021614	2	Good	http://genomevolution.org/r/25fi		GRMZM2G152689	Sb03g008270	PAC:18178661	Os01g02120	Bradi2g01020	http://genomevolution.org/r/25fj	No Gene Identified by Maizesequence.org	NA
add1	1	alternative discordia1	Y	http://www.maizegdb.org/cgi-bin/displaylocusrecord.cgi?id=910081	FJ469779			GRMZM2G120178-GRMZM2G050800	2	Gene split by maizesequence.org|exons completely lost	http://genomevolution.org/r/25q4		no synteny	Sb09g003830	no synteny	Os05g05710	Bradi2g35810	http://genomevolution.org/r/269d	No Gene Identified by Maizesequence.org	NA
apt1	1	aberrant pollen transmission1	Y	http://www.maizegdb.org/cgi-bin/displaylocusrecord.cgi?id=9018755	DQ020097	chr9	-1	GRMZM2G448687	2	Good	http://genomevolution.org/r/25z1		chr1:60350962-60857703	Sb01g035230	PAC:18195814	Os03g23030	Bradi1g62280	http://genomevolution.org/r/25z2	GRMZM2G448687	Identical Assignment
conz1	1	constans1		http://www.maizegdb.org/cgi-bin/displaylocusrecord.cgi?id=983648	EU098139	chr9	1	GRMZM2G405368	1	Good	http://genomevolution.org/r/25yf	GRMZM2G545607	chr6:118739516-118902996	Sb10g010050	PAC:18199176	Os06g16370	Bradi1g43670	http://genomevolution.org/r/26it	No Gene Identified by Maizesequence.org	NA
dgat1	1	diacyglycerol acyltransferase1		http://www.maizegdb.org/cgi-bin/displaylocusrecord.cgi?id=1204233	EU039830	chr6	-1	GRMZM2G169089	2	Good	http://genomevolution.org/r/25up		too big a gap	Sb10g022270	too big a gap	too big a gap	Bradi1g37750	http://genomevolution.org/r/26i6	No Gene Identified by Maizesequence.org	NA
dwf1	1	DWF1 like1		http://www.maizegdb.org/cgi-bin/displaylocusrecord.cgi?id=256276	AY523572	chr5	1	GRMZM2G057000	1	Good	http://genomevolution.org/r/25ie	GRMZM2G358007	chr6:81918960-82068734	Sb10g031090	PAC:18198324	no synteny	Bradi1g29520	http://genomevolution.org/r/25if	GRMZM2G057000	Identical Assignment
emp4	1	empty pericarp4	Y	http://www.maizegdb.org/cgi-bin/displaylocusrecord.cgi?id=1233612	DQ291135	chr1	1	GRMZM2G092198	1	Good	http://genomevolution.org/r/25ms		chr5:9135377-9239999	Sb01g009420	PAC:18192321	Os03g51840	Bradi1g09990	http://genomevolution.org/r/26gr	No Gene Identified by Maizesequence.org	NA
hcf106c	1	high chlorophyll fluorescence106c		http://www.maizegdb.org/cgi-bin/displaylocusrecord.cgi?id=124603	AF237945	chr10	-1	GRMZM2G151529	2	Good	http://genomevolution.org/r/25sf	GRMZM2G002911||GRMZM2G151566||GRMZM2G484851	GRMZM5G898735	Sb06g014410	chr6:18139155-18891551	chr4:19177617-19798474	chr5:11253670-11622178	http://genomevolution.org/r/26hq	No Gene Identified by Maizesequence.org	NA
kan1	1	KANADI1		http://www.maizegdb.org/cgi-bin/displaylocusrecord.cgi?id=1219915	EU935003	chr1	-1	GRMZM2G056400	1	Good	http://genomevolution.org/r/25ic		GRMZM2G175827	Sb07g020820	PAC:18186024	Os08g33050	Bradi3g36260	http://genomevolution.org/r/25id	GRMZM2G056400	Identical Assignment
kan3	1	kanadi3		http://www.maizegdb.org/cgi-bin/displaylocusrecord.cgi?id=1219917	EU925399	chr4	1	GRMZM2G175827	2	Good	http://genomevolution.org/r/25vb		GRMZM2G056400	Sb07g020820	PAC:18186024	Os08g33050	Bradi3g36260	http://genomevolution.org/r/25vc	GRMZM2G175827	Identical Assignment
kip1	1	knotted interacting protein1		http://www.maizegdb.org/cgi-bin/displaylocusrecord.cgi?id=1167526	AY082396	chr1	1	GRMZM2G163761	1	Good	http://genomevolution.org/r/25u3	GRMZM2G011588	GRMZM2G011588	Sb01g011970	PAC:18191569	Os03g47730	Bradi1g12510	http://genomevolution.org/r/26bb	GRMZM2G163761	Identical Assignment
lec1	1	leafy cotyledon	Y	http://www.maizegdb.org/cgi-bin/displaylocusrecord.cgi?id=854841	AF410176	chr5	-1	GRMZM2G011789	1	Good	http://genomevolution.org/r/25e0		GRMZM2G124663	Sb04g029350	PAC:18170907	Os02g49370	Bradi3g56400	http://genomevolution.org/r/25e1	No Gene Identified by Maizesequence.org	NA
phyC1	1	phytochromeC1		http://www.maizegdb.org/cgi-bin/displaylocusrecord.cgi?id=978953	AY234829	chr1	-1	GRMZM2G057935	1	Good	http://genomevolution.org/r/25ik	GRMZM2G357074	GRMZM2G129889	Sb01g007850	PAC:18193188	Os03g54084	Bradi1g08400	http://genomevolution.org/r/25il	No Gene Identified by Maizesequence.org	NA
phyC2	1	phytochromeC2		http://www.maizegdb.org/cgi-bin/displaylocusrecord.cgi?id=978954	AY234830	chr5	-1	GRMZM2G129889	2	Good	http://genomevolution.org/r/25qq		GRMZM2G057935	Sb01g007850	PAC:18193188	Os03g54084	Bradi1g08400	http://genomevolution.org/r/25qr	No Gene Identified by Maizesequence.org	NA
Smh1	1	Single Myb Histone1		http://www.maizegdb.org/cgi-bin/displaylocusrecord.cgi?id=894447	AY271659	chr8	1	GRMZM2G136887	2	Good	http://genomevolution.org/r/25r8		GRMZM2G087817	Sb03g026470	PAC:18176862	Os01g40670	Bradi2g42240	http://genomevolution.org/r/25r9	No Gene Identified by Maizesequence.org	NA
Smh3	1	Single Myb Histone3		http://www.maizegdb.org/cgi-bin/displaylocusrecord.cgi?id=894670	AY280629	chr8	1	GRMZM2G023667	2	Good	http://genomevolution.org/r/25fk		GRMZM2G108318	Sb03g032540	PAC:18175080	Os01g51170	Bradi2g47830	http://genomevolution.org/r/25fl	No Gene Identified by Maizesequence.org	NA
Smh4	1	Single Myb Histone4		http://www.maizegdb.org/cgi-bin/displaylocusrecord.cgi?id=887785	AY280631	chr3	-1	GRMZM2G108424	1	Good	http://genomevolution.org/r/25oe		GRMZM2G023667	Sb03g032530	PAC:18175376	Os01g51154	Bradi2g47820	http://genomevolution.org/r/25of	GRMZM2G108424	Identical Assignment
Smh5	1	Single Myb Histone5		http://www.maizegdb.org/cgi-bin/displaylocusrecord.cgi?id=894672	AY280630	chr3	-1	GRMZM2G163291	1	Good	http://genomevolution.org/r/25u1		chr8:15552984-15838810	Sb03g005080	PAC:18177262	chr1:2844116-3337953	too big a gap	http://genomevolution.org/r/26i1	No Gene Identified by Maizesequence.org	NA
Smh6	1	Single Myb Histone6		http://www.maizegdb.org/cgi-bin/displaylocusrecord.cgi?id=894673	AY280632	chr5	1	GRMZM2G095239	2	Good	http://genomevolution.org/r/25n0		chr1:251113046-251435664	Sb01g013670	PAC:18192353	no synteny	Bradi1g13880	http://genomevolution.org/r/25n1	GRMZM2G095239	Identical Assignment
spi1	1	sparse inflorescence1	Y	http://www.maizegdb.org/cgi-bin/displaylocusrecord.cgi?id=1219936	EU910940	chr3	-1	GRMZM2G025222	NA	5' end of CDS lost in gap	http://genomevolution.org/r/25fs		no synteny	no synteny	no synteny	no synteny	no synteny	http://genomevolution.org/r/25ft	No Gene Identified by Maizesequence.org	NA
tacs1	1	Terminal Acidic SANT 1		http://www.maizegdb.org/cgi-bin/displaylocusrecord.cgi?id=936039	AY738116	chr6	1	GRMZM2G111906	2	Good	http://genomevolution.org/r/25ow		too big a gap	chr10:59803993-60610533	chr10:39483926-40026657	chr6:30308446-31043218	too big a gap	http://genomevolution.org/r/268r	No Gene Identified by Maizesequence.org	NA
yy1	1	yin-yang1		http://www.maizegdb.org/cgi-bin/displaylocusrecord.cgi?id=904876	AF142322	chr4	1	GRMZM2G140016	2	Good	http://genomevolution.org/r/25rl		GRMZM5G885700	Sb04g022470	PAC:18171413	Os02g34680	Bradi3g45590	http://genomevolution.org/r/25rm	No Gene Identified by Maizesequence.org	NA
Smh2	1	Single Myb Histone2				chr3	1	GRMZM2G087817	1	No GenBank Record|personal communication	http://genomevolution.org/r/25m2		GRMZM2G136887	Sb03g026470	PAC:18176862	Os01g40670	Bradi2g42240	http://genomevolution.org/r/25m3	No Gene Identified by Maizesequence.org	NA
Sun1	1	sad1-unc84-like 1 CCSD type			EU964563	chr5	-1	GRMZM2G109818	1	personal communication	http://genomevolution.org/r/25ok		chr4:235274541-235384107	Sb04g005160	PAC:18172790	chr2:4152195-4473675	chr3:3981702-4275327	http://genomevolution.org/r/26h3	No Gene Identified by Maizesequence.org	NA
Sun2	1	sad1-unc84-like 2 CCSD type			BT055722	chr3	1	GRMZM2G440614	1	personal communication	http://genomevolution.org/r/25yx		chr8:3612446-3846039	Sb03g010590	PAC:18176774	Os01g16220	Bradi2g09990	http://genomevolution.org/r/25yy	No Gene Identified by Maizesequence.org	NA
Sun4	1	sad1-unc84-like 4 PM3 type			GU453173	chr8	1	GRMZM2G005483	2	personal communication	http://genomevolution.org/r/25de		GRMZM2G120262	Sb03g041510	PAC:18180035	Os01g65520	Bradi2g56660	http://genomevolution.org/r/25df	No Gene Identified by Maizesequence.org	NA
Sun4	1	sad1-unc84-like 5 PM3 type			EU953247	chr8	1	AC194341.4_FG003	2	personal communication	http://genomevolution.org/r/25bm		chr3:223040226-223147269	Sb03g026980	too big a gap	Os01g41600	Bradi2g42670	http://genomevolution.org/r/26ev	No Gene Identified by Maizesequence.org	NA
